# Supplementary material for: Effectiveness of Iodophor vs Chlorhexidine Solutions for Surgical Site Infections and Unplanned Reoperations for Patients Who Underwent Fracture Repair: The PREP-IT Master Protocol
Source: PubMed Central journal article supplement (PMC7139274; doi:10.1001/jamanetworkopen.2020.2215), 2020-04-07
Supplement: jamanetwopen-3-e202215-s001.pdf [file jamanetwopen-3-e202215-s001.pdf]

1  
2  
3  
4  
5  
6  
7  
8  
9  
10  
11  
12  
13  
14  
15  
16  
17  
18  
19  
20  
21  
22  
23  
24  
25  
26  
27

**PREP-IT**  
**A Program of Randomized trials to Evaluate Pre-operative antiseptic skin solutions In orthopaedic Trauma**

**Aqueous-PREP: A Pragmatic Randomized trial Evaluating Pre-operative aqueous antiseptic skin solutions in open fractures**

**Aqueous-PREP PROTOCOL**

**Version: 2.1**

**Date: 04-Nov-2019**

This study is funded by the US Department of Defense, Physician Services Incorporated, and McMaster University Surgical Associates.

The Aqueous-PREP trial is part of the PREP-IT research program. The protocol is the confidential intellectual property of the Principal Investigators and PREP-IT Steering Committee, and the protocol cannot be used in any form without the expressed written permission of the Principal Investigators.

|                                                          |                                                                                                                  |                                 |
|----------------------------------------------------------|------------------------------------------------------------------------------------------------------------------|---------------------------------|
| <b><i>Reviewed and Approved by:</i></b>                  |                                                                                                                  |                                 |
| <i>Dr. Gerard Slobogean<br/>(Principal Investigator)</i> | <b><i>Signature:</i></b><br>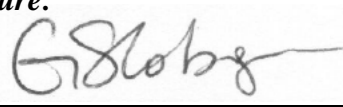 | <b><i>Date:</i></b> 04-Nov-2019 |
| <i>Dr. Sheila Sprague<br/>(Principal Investigator)</i>   | <b><i>Signature:</i></b><br>  | <b><i>Date:</i></b> 04-Nov-2019 |
| <i>Dr. Mohit Bhandari<br/>(Principal Investigator)</i>   | <b><i>Signature:</i></b><br> | <b><i>Date:</i></b> 04-Nov-2019 |

28  
29  
30  
31

|    |                                                                                   |           |
|----|-----------------------------------------------------------------------------------|-----------|
| 32 | <b>TABLE OF CONTENTS</b>                                                          |           |
| 33 |                                                                                   |           |
| 34 | <b>LIST OF ABBREVIATIONS .....</b>                                                | <b>4</b>  |
| 35 | <b>STUDY SUMMARY.....</b>                                                         | <b>5</b>  |
| 36 | <b>1.0 INTRODUCTION.....</b>                                                      | <b>7</b>  |
| 37 | 1.1 Open Fractures .....                                                          | 7         |
| 38 | 1.2 Prevention of Infection .....                                                 | 7         |
| 39 | 1.3 Rationale for Pre-Operative Antiseptic Skin Solution Prophylaxis.....         | 7         |
| 40 | 1.4 Extrapolating Evidence from Other Surgical Disciplines to Fracture Surgery is |           |
| 41 | Problematic .....                                                                 | 8         |
| 42 | 1.5 Why Iodophor Skin Preparations May Reduce Open Fracture SSI.....              | 9         |
| 43 | 1.6 Why Iodophor Skin Preparations May Reduce Open Fracture Reoperations .....    | 9         |
| 44 | 1.7 Lack of Surgeon Consensus.....                                                | 10        |
| 45 | <b>2.0 STUDY OBJECTIVES AND HYPOTHESES.....</b>                                   | <b>10</b> |
| 46 | 2.1 Study Objectives and Hypotheses.....                                          | 10        |
| 47 | 2.2 Subgroup Objectives.....                                                      | 11        |
| 48 | <b>3.0 TRIAL DESIGN.....</b>                                                      | <b>11</b> |
| 49 | 3.1 Summary .....                                                                 | 11        |
| 50 | 3.2 Pragmatic-Explanatory Continuum .....                                         | 12        |
| 51 | <b>4.0 METHODS .....</b>                                                          | <b>13</b> |
| 52 | 4.1 Study Setting, Cluster Eligibility, and Selection of Clusters .....           | 13        |
| 53 | 4.2 Eligibility Criteria .....                                                    | 14        |
| 54 | 4.3 Recruitment Strategy .....                                                    | 15        |
| 55 | 4.3.1 Patient Screening and Consent.....                                          | 15        |
| 56 | 4.3.2 Enrollment Sampling Plan .....                                              | 16        |
| 57 | 4.4 Randomization Methods .....                                                   | 16        |
| 58 | 4.5 Blinding.....                                                                 | 17        |
| 59 | 4.6 Description of the Interventions.....                                         | 17        |
| 60 | 4.6.1 Initial Run-In Phase .....                                                  | 17        |
| 61 | 4.6.2 First Intervention Phase .....                                              | 17        |
| 62 | 4.6.3 Second Intervention Phase.....                                              | 18        |
| 63 | 4.6.4 Special Considerations for Ongoing Treatment Crossovers.....                | 18        |
| 64 | 4.6.5 Evaluation of Site Performance and Removal of Clinical Sites .....          | 18        |
| 65 | 4.6.6 Application of Pre-Operative Antiseptic Skin Solutions .....                | 19        |
| 66 | 4.6.7 Povidone-Iodine Treatment .....                                             | 19        |
| 67 | 4.6.8 Chlorhexidine Gluconate Treatment.....                                      | 20        |
| 68 | 4.7 Perioperative Co-Interventions .....                                          | 20        |
| 69 | 4.8 Outcome Measures.....                                                         | 20        |
| 70 | 4.8.1 Primary Outcome .....                                                       | 20        |
| 71 | 4.8.2 Secondary Outcome .....                                                     | 23        |
| 72 | 4.8.3 Exploratory Outcomes .....                                                  | 23        |
| 73 | 4.8.4 Data Collection and Participant Follow-up.....                              | 24        |
| 74 | <b>5.0 STATISTICAL PLAN.....</b>                                                  | <b>25</b> |

|     |                                                                              |           |
|-----|------------------------------------------------------------------------------|-----------|
| 75  | 5.1 Sample Size Determination.....                                           | 25        |
| 76  | 5.2 Statistical Methods.....                                                 | 26        |
| 77  | 5.2.1 Analysis Plan Overview.....                                            | 26        |
| 78  | 5.2.2 Analysis of the Study Outcomes.....                                    | 27        |
| 79  | 5.2.3 Subgroup Analyses.....                                                 | 27        |
| 80  | 5.2.4 Sensitivity Analyses.....                                              | 28        |
| 81  | 5.2.5 Interim Analysis.....                                                  | 30        |
| 82  | <b>6.0 DATA MANAGEMENT.....</b>                                              | <b>30</b> |
| 83  | 6.1 Case Report Forms and Data Transmission.....                             | 30        |
| 84  | 6.2 Data Integrity.....                                                      | 30        |
| 85  | <b>7.0 ETHICS AND DISSEMINATION.....</b>                                     | <b>30</b> |
| 86  | 7.1 Research Ethics Approval.....                                            | 30        |
| 87  | 7.2 Consent.....                                                             | 30        |
| 88  | 7.3 Confidentiality.....                                                     | 32        |
| 89  | 7.4 Protocol Amendments.....                                                 | 32        |
| 90  | 7.5 Adverse Event Reporting and Definitions.....                             | 32        |
| 91  | 7.5.1 Serious Adverse Event (SAE).....                                       | 32        |
| 92  | 7.5.2 Unanticipated Problems Resulting in Risk to Participant or Others..... | 33        |
| 93  | 7.5.3 Clinical Site Reporting: Notifying the Methods Center.....             | 33        |
| 94  | 7.5.4 Clinical Site Reporting – IRB and REB.....                             | 33        |
| 95  | 7.5.5 Safety Monitoring.....                                                 | 33        |
| 96  | 7.6 Dissemination Policy.....                                                | 33        |
| 97  | <b>8.0 DEPARTMENT OF DEFENSE REPORTING REQUIREMENTS.....</b>                 | <b>34</b> |
| 98  | <b>9.0 SUB-STUDY: PATIENT EXPERIENCES IN THE AQUEOUS-PREP AND</b>            |           |
| 99  | <b>PREPARE TRIALS.....</b>                                                   | <b>34</b> |
| 100 | 9.1 Introduction.....                                                        | 34        |
| 101 | 9.2 Rationale and Objectives.....                                            | 35        |
| 102 | 9.3 Sub-Study Design.....                                                    | 35        |
| 103 | 9.4 Survey Participants and Distribution.....                                | 36        |
| 104 | 9.5 Data Entry.....                                                          | 36        |
| 105 | 9.6 Sample Size.....                                                         | 36        |
| 106 | 9.7 Data Analysis.....                                                       | 36        |
| 107 | 9.8 Anticipated Implications of Results.....                                 | 36        |
| 108 | <b>10.0 REFERENCES.....</b>                                                  | <b>38</b> |
| 109 |                                                                              |           |
| 110 |                                                                              |           |
| 111 |                                                                              |           |
| 112 |                                                                              |           |
| 113 |                                                                              |           |
| 114 |                                                                              |           |
| 115 |                                                                              |           |
| 116 |                                                                              |           |
| 117 |                                                                              |           |
| 118 |                                                                              |           |

## LIST OF ABBREVIATIONS

| <b>Abbreviation</b> | <b>Explanation</b>                                                                                                                        |
|---------------------|-------------------------------------------------------------------------------------------------------------------------------------------|
| Aqueous-PREP        | A <u>P</u> ragmatic <u>R</u> andomized trial <u>E</u> valuating <u>P</u> re-operative aqueous antiseptic skin solutions in open fractures |
| CDC                 | Centers for Disease Control and Prevention                                                                                                |
| CEO                 | Center for Evidence-Based Orthopaedics                                                                                                    |
| CHG                 | Chlorhexidine gluconate                                                                                                                   |
| CI                  | Confidence interval                                                                                                                       |
| CRF                 | Case report form                                                                                                                          |
| EDC                 | Electronic data capture                                                                                                                   |
| FDA                 | Food and Drug Administration                                                                                                              |
| FLOW                | Fluid Lavage of Open Wounds trial                                                                                                         |
| FRI                 | Fracture-related infection                                                                                                                |
| GEE                 | Generalized estimating equations                                                                                                          |
| HRPO                | Human Research Protection Office                                                                                                          |
| ITT                 | Intention-to-treat                                                                                                                        |
| IRB                 | Institutional Review Board                                                                                                                |
| ORP                 | Office of Research Protections                                                                                                            |
| REB                 | Research Ethics Board                                                                                                                     |
| SAE                 | Serious adverse event                                                                                                                     |
| SSI                 | Surgical site infection                                                                                                                   |
| USAMRMC             | United States Army Medical Research and Materiel Command                                                                                  |

|                                              |                                                                                                                                                                                                                                                                                                                                                                                                                                                                                                                                                                                                                                                                                           |
|----------------------------------------------|-------------------------------------------------------------------------------------------------------------------------------------------------------------------------------------------------------------------------------------------------------------------------------------------------------------------------------------------------------------------------------------------------------------------------------------------------------------------------------------------------------------------------------------------------------------------------------------------------------------------------------------------------------------------------------------------|
| <b>Methodology</b>                           | Cluster randomized crossover design.                                                                                                                                                                                                                                                                                                                                                                                                                                                                                                                                                                                                                                                      |
| <b>Coordinating Center</b>                   | This study will be centrally coordinated by the Methods Center at the Center for Evidence-Based Orthopaedics (CEO), McMaster University, Hamilton, Ontario and by the Administrative Center within the Department of Orthopaedics at the University of Maryland, R Adams Cowley Shock Trauma Center, Baltimore, Maryland.                                                                                                                                                                                                                                                                                                                                                                 |
| <b>Clinical Sites</b>                        | At least 12 clinical sites. Additional clinical sites will be included or removed as needed.                                                                                                                                                                                                                                                                                                                                                                                                                                                                                                                                                                                              |
| <b>Background</b>                            | The prevention of infection is the single most important goal influencing peri-operative care of patients with open fractures. Standard practice in the management of open fractures includes sterile technique and pre-operative skin preparation with an antiseptic solution. The available solutions kill bacteria and decrease the quantity of native skin flora, thereby decreasing surgical site infection (SSI). <sup>1-4</sup> While there is extensive guidance on specific procedures for prophylactic antibiotic use and standards for sterile technique, the evidence regarding the choice of antiseptic skin preparation solution is very limited for open fracture surgery. |
| <b>Objectives</b>                            | The overall objective is to compare the effectiveness of aqueous pre-operative antiseptic skin preparation with 10% povidone-iodine versus 4% chlorhexidine gluconate (CHG) for the management of open fractures. A ranked order for assessing effectiveness will be used with <i>surgical site infection (SSI)</i> as the primary comparison and <i>unplanned fracture-related reoperations</i> as the secondary comparison.                                                                                                                                                                                                                                                             |
| <b>Subgroup Objectives</b>                   | We will explore if the pre-operative antiseptic skin solutions have different magnitudes of effect on SSI within three clinically important open fracture subgroups: severity of open fracture, location of fracture, and severity of wound contamination.                                                                                                                                                                                                                                                                                                                                                                                                                                |
| <b>Diagnosis and Main Inclusion Criteria</b> | All patients 18 years of age or older who present to a recruiting hospital for treatment of an open fracture(s) of the appendicular skeleton will be screened for participation within 3 weeks of their fracture. Eligible patients must receive surgical debridement of their open fracture wound(s) within 72 hours of their injury and the open fracture(s) must be managed definitively with a surgical implant (e.g., internal fixation, external fixation, joint prosthesis, etc.).                                                                                                                                                                                                 |

|                         |                                                                                                                                                                                                                                                                                                                                                                                                                                                                                                                                                                                                                                                                                                                                                                              |
|-------------------------|------------------------------------------------------------------------------------------------------------------------------------------------------------------------------------------------------------------------------------------------------------------------------------------------------------------------------------------------------------------------------------------------------------------------------------------------------------------------------------------------------------------------------------------------------------------------------------------------------------------------------------------------------------------------------------------------------------------------------------------------------------------------------|
| <b>Treatment Groups</b> | The Aqueous-PREP trial will compare two common iodophor and chlorhexidine based pre-operative antiseptic skin solutions used during open fracture surgery: 1) <i>Povidone-iodine</i> : 10% povidone-iodine (1% free iodine) in purified water and 2) <i>CHG</i> : 4% chlorhexidine gluconate in purified water.                                                                                                                                                                                                                                                                                                                                                                                                                                                              |
| <b>Randomization</b>    | Treatment allocation will be determined using a cluster-randomized crossover trial design. The order of treatment allocation for each orthopaedic practice will be randomly assigned using a computer-generated randomization table. Each site will start with the initially allocated study solution and eventually crossover to the other solution for their second recruitment period. This process of alternating treatments will repeat approximately every 2 months as dictated by the initial randomization.                                                                                                                                                                                                                                                          |
| <b>Study Outcomes</b>   | The primary outcome is SSI, guided by the Centers for Disease Control and Prevention's (CDC) National Healthcare Safety Network reporting criteria, <sup>5</sup> which includes superficial incisional SSI within 30 days and deep incisional or organ/space SSI within 90 days of definitive fracture management surgery. The secondary outcome is the occurrence of an unplanned fracture-related reoperation within 12 months of the fracture. Alternative definitions of SSI, including the confirmatory criteria for Fracture-Related Infection (FRI) and the CDC criteria within 1 year of injury will be used for sensitivity analyses of the primary comparison. All study outcomes will be adjudicated by a blinded committee using clinical notes and radiographs. |
| <b>Follow-Up</b>        | Study participants will be followed at 6 weeks, 3 months, 6 months, 9 months, and 12 months from their fracture.                                                                                                                                                                                                                                                                                                                                                                                                                                                                                                                                                                                                                                                             |
| <b>Sample Size</b>      | A minimum of 1,540 participants with open fractures.                                                                                                                                                                                                                                                                                                                                                                                                                                                                                                                                                                                                                                                                                                                         |
| <b>Significance</b>     | SSIs are often devastating complications for open fracture patients because of the resultant reoperations, adverse events from antibiotic courses, and fracture healing difficulties. Given the severity of open fractures, maximizing the effectiveness of current prophylactic procedures is essential. The Aqueous-PREP trial will provide necessary evidence to guide the prevention of SSIs in open fractures, and the trial is poised to have a significant impact on the care and outcomes of open extremity fracture patients.                                                                                                                                                                                                                                       |

121  
122

123 **1.0 INTRODUCTION**

124

125 1.1 Open Fractures

126 Open fractures represent some of the most severe musculoskeletal injuries.<sup>6</sup> Due to their high-  
127 energy mechanisms, these extremity fractures are accompanied by soft-tissue injuries that  
128 contribute to unacceptably poor outcomes. The Fluid Lavage of Open Wounds (FLOW) trial of  
129 2,447 open fracture patients reported a 13.2% incidence of open fracture-related reoperations;<sup>7</sup>  
130 however, these study events were even more common in open wounds with severe contamination  
131 (29.8%, 95% confidence interval (CI): 22.6–38.1%) and in patients with higher grades of injury  
132 (Gustilo-Anderson Type III: 18.0%, 95% CI: 15.6–20.7%). Ultimately, complications from open  
133 fractures lead to prolonged morbidity, loss of function, and potential limb loss.<sup>8</sup>

134

135 1.2 Prevention of Infection

136 The prevention of infection is the single most important goal influencing peri-operative care of  
137 patients with open fractures. Standard practice in the management of open fractures includes  
138 sterile technique and pre-operative skin cleaning with an antiseptic solution. The available  
139 solutions kill bacteria and decrease the quantity of native skin flora, thereby decreasing surgical  
140 site infection (SSI).<sup>1–4</sup> While there is extensive guidance on specific procedures for prophylactic  
141 antibiotic use and standards for sterile technique, the evidence regarding the choice of antiseptic  
142 skin preparation solution is very limited for open fracture surgery.

143

144 1.3 Rationale for Pre-Operative Antiseptic Skin Solution Prophylaxis

145 The most common skin preparation solutions include either an iodophor or chlorhexidine-based  
146 active ingredient, and are delivered in an alcohol or aqueous-based solution. Iodophors achieve  
147 effective antisepsis by penetrating the cell wall of microorganisms and disrupting critical protein  
148 and nucleic acid structures.<sup>9</sup> Iodophors are effective against most bacteria, but also may have  
149 broader-spectrum coverage of mycobacteria, viruses, and some spores compared to  
150 chlorhexidine gluconate (CHG).<sup>9</sup> CHG similarly achieves antimicrobial effects by penetrating  
151 the cell wall of microorganisms. This antimicrobial action allows CHG to be effective against  
152 most bacteria.<sup>9</sup>

153

154 The evidence guiding pre-operative antiseptic skin solution choice in fracture surgery is largely  
155 extrapolated from other surgical disciplines. In a randomized controlled trial involving 849  
156 patients undergoing clean-contaminated abdominal, gynecologic, or urologic surgery, the use of  
157 2% CHG in 70% isopropyl alcohol was compared to aqueous 10% povidone-iodine. The overall  
158 rate of 30-day SSI was significantly lower in the CHG-alcohol group than the povidone-iodine  
159 group (9.5% vs. 16.1%; P=0.004; relative risk, 0.59; 95% CI: 0.41–0.85). While this study  
160 demonstrated superior efficacy of CHG-alcohol compared to povidone-iodine, comparing an  
161 alcohol based solution to an aqueous solution creates uncertainty about whether the result  
162 observed occurred from the superiority of CHG over iodine, isopropyl alcohol over water, or a  
163 synergistic combination of CHG with alcohol.<sup>1</sup> In an effort to overcome the controversies  
164 associated with comparing CHG and iodine in different solutions, a more recent randomized  
165 controlled trial of 1,147 caesarean section patients allocated patients to 2% CHG with 70%  
166 isopropyl alcohol versus 8.3% povidone-iodine with 72.5% isopropyl alcohol. Similar to the  
167 previous randomized controlled trial, CHG proved more efficacious for reducing 30-day SSI

168 (4.0% in the CHG-alcohol group and 7.3% in the iodine-alcohol group; relative risk, 0.55; 95%  
169 CI: 0.34–0.90; P=0.02).<sup>2</sup>

170  
171 While the evidence from the above two randomized controlled trials demonstrate decreased SSI  
172 from CHG solutions in clean-contaminated abdominal and genito-urinary surgery, a larger non-  
173 randomized trial reported opposite effectiveness results. Swenson *et al.*, completed a larger 3,209  
174 patient pragmatic sequential implementation study, in which the use of the preoperative skin  
175 antiseptic solution was changed after six-month periods.<sup>4</sup> In this study, there were three  
176 treatment periods, each with approximately 1,000 general surgery patients undergoing elective  
177 and emergent cases. In the first period, patients received 7.5% povidone-iodine scrub, 70%  
178 isopropyl alcohol scrub, and 10% povidone-iodine skin paint. The second group received 2%  
179 CHG with 70% isopropyl alcohol (CHG group), and the third group received 0.7% iodine  
180 povacrylex in 74% isopropyl alcohol. Adjusted comparisons were performed using the intention  
181 to treat principle and an as-treated analysis. Lower SSI rates were seen in the povidone-iodine  
182 skin paint group (4.8%) and the iodine povacrylex in isopropyl alcohol group (4.8%), compared  
183 with the SSI rates in the 2% chlorhexidine and 70% isopropyl alcohol group (8.2%) (P< 0.05;  
184 povidone-iodine skin paint odds ratio: 0.56, 95% CI: 0.40–0.79).<sup>4</sup> While the results of the  
185 Swenson study contradict those of the smaller randomized controlled trials, this large pragmatic  
186 study further highlights that the choice of antiseptic skin solution affects SSIs, and data to select  
187 the best solution remains conflicting.

188  
189 Considering the conflicting data, the most recent Cochrane systematic review comparing the  
190 efficacy of pre-operative antiseptic skin solutions for clean surgery concluded, “investment in at  
191 least one large trial (in terms of participants) is warranted to add definitive and hopefully  
192 conclusive data to the current evidence base. Ideally any future trial would evaluate the iodine-  
193 containing and chlorhexidine-containing solutions relevant to current practice...”<sup>10</sup> The  
194 Cochrane recommendation is a direct response to the limitations of the current available  
195 literature comparing antiseptic skin solutions. For orthopaedic fracture surgery, the impact of the  
196 treatment uncertainty is further magnified when considering the higher rates of SSIs among open  
197 fracture patients.

198  
199 1.4 Extrapolating Evidence from Other Surgical Disciplines to Fracture Surgery is Problematic  
200 With regards to orthopaedic patients, the inconsistent results leave the optimal antiseptic solution  
201 in doubt; in addition, results may differ across surgical settings. The risk of SSI is substantially  
202 greater in open fracture patients due to both the nature of the injury and the required surgery to  
203 fix broken bones. Furthermore, the emergent nature of fracture surgery means that patients are  
204 unable to undergo other prophylactic skin care, such as CHG bathing, which is rendered to  
205 elective cases to reduce SSI.

206  
207 Most important, the contamination from the injury is a critical difference from elective  
208 abdominal or gynecologic surgery. Other differences include substantial soft tissue damage  
209 during the injury, the use of a tourniquet that decreases the blood flow to the limb (potentially  
210 increasing the risk of infection), and the additional risk of implanting metal fixation that can  
211 harbor bacteria. Swenson *et al.*, directly acknowledged that the studies performed in general  
212 surgery patients may not apply to other specialties, particularly orthopaedic surgery.<sup>4</sup> Even if one



213 wanted to directly apply the conflicting results outlined above to the care of open fractures, there  
214 are critical limitations in the sparse general surgery and obstetrical literature available.

215  
216 The most significant limitation in the existing literature is the use of a 30-day endpoint for SSI in  
217 all three studies described above.<sup>1,2,4</sup> While this may be acceptable for identifying most SSIs that  
218 involve only the skin (superficial SSI), infections that occur deep to the muscle and around the  
219 bone (deep SSI and organ/space SSI) often present beyond 30-days post-injury and have  
220 significantly more morbidity and mortality than superficial SSI. This is a major limitation to the  
221 external validity of the previous studies' ability to guide fracture fixation practice. In the FLOW  
222 open fracture trial, nearly half the infection-related complications were identified between 30 and  
223 90 days from injury.<sup>7</sup> Not only does the existing literature not extend follow-up during this  
224 period, it is plausible that the treatment effects of the antiseptic solutions behave differently for  
225 preventing deep or organ/space infections that often present between 30 and 90 days post-  
226 surgery. The need for longer follow-up is supported by a mandatory 90-day surveillance period  
227 for deep and organ/space SSIs according to the Centers for Disease Control and Prevention  
228 (CDC).<sup>5</sup> Therefore, the lack of directly applicable evidence, an overall paucity of good clinical  
229 evidence, and the inadequate duration of outcome follow-up mandate the need for a large,  
230 rigorous clinical trial in surgical preparation solutions in open fracture care.

231  
232 1.5 Why Iodophor Skin Preparations May Reduce Open Fracture SSI  
233 The only surgical skin preparation effectiveness data available for open fracture management  
234 come from the FLOW trial.<sup>7</sup> Secondary multivariable analyses of 2,447 patients with open  
235 fractures found that when compared to chlorhexidine solutions, iodophor-based skin antiseptic  
236 preparation solutions could be protective against complications (Adjusted Hazard Ratio 0.88,  
237 95% CI: 0.69–1.12).<sup>7</sup> However, the wide CI suggests iodophor solutions may reduce the odds of  
238 infection by as much as 31% or increase it by as much as 12%, leaving its superiority as a  
239 fracture care surgical preparation solution unresolved.<sup>7</sup>

240  
241 There are several chemical properties to suggest povidone-iodine may be more effective than  
242 CHG at preventing open fracture SSI.<sup>9</sup> Firstly, povidone-iodine has a broader spectrum of  
243 antimicrobial activity.<sup>9</sup> Secondly, many open fracture patients require repeat surgical  
244 debridement and therefore, these patients will receive multiple exposures to the pre-operative  
245 antiseptic solution. Extended use of povidone-iodine has not been associated with the selection  
246 of resistant bacterial strains, whereas bacterial resistance to chlorhexidine has been  
247 documented.<sup>9,11,12</sup> While the methods for detecting CHG resistance are challenging and its  
248 clinical significance remains uncertain, these early observations heighten interest in establishing  
249 the comparative effectiveness of iodophors versus CHG.

250  
251 1.6 Why Iodophor Skin Preparations May Reduce Open Fracture Reoperations  
252 While the primary rationale for using antiseptic skin preparation solutions is to reduce the risk of  
253 SSI, many fracture healing complications are associated with indolent infections. These low-  
254 grade infections typically do not exhibit clinical signs consistent with SSI. Instead, they present  
255 several months post-fracture fixation and are only detected from deep tissue samples collected  
256 during secondary surgeries to treat fractures that fail to heal (nonunion). Previous fracture non-  
257 union studies have identified an infectious etiology in 31–38% of cases.<sup>13,14</sup> Similarly, results  
258 from the FLOW trial suggest that 58% of the reoperation events were caused by fracture

259 nonunion or a hardware failure related to infection, wound-healing problem, or bone-healing  
260 problem (n= 188/323). In addition, among a series of 211 patients requiring reoperation for deep  
261 post-operative fracture infections, 40% of open fracture infections occurred beyond the 90-day  
262 surveillance period for SSI.<sup>15</sup> Therefore, given the rationale that povidone-iodine may be more  
263 effective in preventing SSI, it is clinically plausible that its use may also reduce unplanned open  
264 fracture reoperations.

### 265 266 1.7 Lack of Surgeon Consensus

267 The FLOW trial demonstrated a clear divide among orthopaedic surgeons regarding their choice  
268 to use the two most common antiseptic solutions during open fracture fixation surgery.<sup>7</sup> Iodophor  
269 solutions were used in 54% of the surgeries performed, while 41% were performed using  
270 chlorhexidine solutions. The remaining surgeons either used both iodophor and chlorhexidine  
271 (4%), or alcohol with no iodophor or chlorhexidine (1%).<sup>7</sup> Building upon the lack of consensus  
272 among orthopaedic surgeons participating in the FLOW trial, our research team conducted an  
273 internet-based survey and several interviews with orthopaedic surgeons to understand the reasons  
274 for the lack of consensus in the use of surgical preparation solutions. Similar to the observations  
275 of the FLOW trial, there was nearly an equal split between the use of iodophor and chlorhexidine  
276 solutions. More insight was gained in interviews with the surgeons. Three main drivers for  
277 surgeon decision-making were identified: 1) they continued to use the antiseptic solution shown  
278 to them during their surgical training, 2) they used the solution recommended by their hospital,  
279 or 3) they felt the tissue toxicity was less with their chosen solution. No surgeon could cite a  
280 clinical study that helped guide their decision, despite all surgeons indicating they believed the  
281 antiseptic solution was important for reducing their patient's risk of SSI. Limited consensus  
282 among surgeons reflects a lack of compelling evidence on the optimal approaches to surgical  
283 skin preparation, further vindicating the need for a large definitive trial.

284  
285 The *Aqueous-PREP trial, A Pragmatic Randomized trial Evaluating Pre-operative aqueous*  
286 *antiseptic skin solutions in open fractures*, will address these gaps in the literature.

## 287 288 **2.0 STUDY OBJECTIVES AND HYPOTHESES**

### 289 290 2.1 Study Objectives and Hypotheses

291 The overarching objective of this trial is to compare the effectiveness of an aqueous pre-  
292 operative antiseptic skin preparation with 10% povidone-iodine versus 4% CHG for the  
293 management of open fractures. A ranked order for assessing effectiveness will be used, with  
294 *surgical site infection (SSI)* as the primary comparison (primary objective) and *unplanned*  
295 *fracture-related reoperations* as the secondary comparison (secondary objective). While  
296 previous randomized controlled trials in general surgery and gynecology demonstrated superior  
297 efficacy of chlorhexidine-alcohol solutions to reduce SSIs,<sup>1,2</sup> results from larger populations of  
298 general surgery patients and the recently completed FLOW trial<sup>7</sup> suggest iodophor-based  
299 solutions could be more effective than chlorhexidine in open fracture patients. Therefore, we  
300 hypothesize that aqueous solutions of 10% povidone-iodine will be more effective than aqueous  
301 4% CHG to reduce 90-day SSIs or unplanned fracture-related reoperations within one year of  
302 injury.

303

304 2.2 Subgroup Objectives

305 The Aqueous-PREP trial will also explore the possibility of differential treatment effects of the  
306 pre-operative antiseptic skin solutions among clinically important open fracture subgroups.  
307 Subgroups will be defined by: i) the severity of open fracture (Gustilo-Anderson type I or II  
308 versus III);<sup>8</sup> ii) upper extremity versus lower extremity open fractures; and iii) severity of wound  
309 contamination. High-grade soft tissue injury (Gustilo-Anderson type III), lower extremity open  
310 fractures, and moderate/severe wound contamination are established predictors of SSI and  
311 reoperations from the FLOW trial.<sup>16</sup> In addition, there are known differences in patients' skin  
312 flora based on anatomic region of injury. As a result, it is likely that the study interventions may  
313 be more effective in certain subgroups. Due to its broader spectrum of antimicrobial activity, the  
314 increased effectiveness observed by Swenson *et al.*, and the possible benefits observed in the  
315 FLOW trial, we hypothesize that 10% povidone-iodine antiseptic skin solution will be associated  
316 with a larger reduction in odds for SSI and reoperation in open fracture patients with worse  
317 fracture severity, lower extremity fractures, and more severely contaminated wounds.

318

319 **3.0 TRIAL DESIGN**

320

321 3.1 Summary

322 This study is a multi-center pragmatic cluster randomized crossover trial of a minimum of 1,540  
323 participants with open extremity fractures requiring surgical management. The unit of  
324 randomization is the orthopaedic practices within clinical sites (clusters), with individual patients  
325 being the unit of analysis. Recruitment for each treatment group will be performed in multiple  
326 iterations of approximately two-month periods. Each orthopaedic practice will initially be  
327 randomized to use one of two pre-operative aqueous surgical skin preparation solutions (10%  
328 povidone-iodine or 4% CHG) for open fracture surgeries at their institution (**Figure 1**). Upon  
329 completion of the two-month period, each orthopaedic practice will crossover to the alternative  
330 treatment allocation and complete another two-month recruitment period. This process of  
331 alternating treatment periods (crossovers) will continue until the minimum sample size is  
332 achieved and the study's budgeted recruitment duration is completed. Upon completion of  
333 recruitment, it is expected that each orthopaedic practice will enroll a minimum of 77 patients  
334 per treatment, and that most clinical sites will exceed this minimum recruitment goal. Clinical  
335 site personnel will screen potential patients for eligibility, and if eligible, they will be invited to  
336 participate in the trial. Study participants will be assessed at regular intervals in the one year  
337 following their fracture. The primary outcome will include any SSI event from the time of open  
338 fracture to the end of the 30- and 90-day post-operative periods from their definitive fracture  
339 management surgery. The secondary outcome will include unplanned fracture-related  
340 reoperations that occur within one-year of their fracture. A blinded Adjudication Committee will  
341 review SSIs and unplanned fracture-related reoperations to confirm that they meet the criteria for  
342 being a study event.

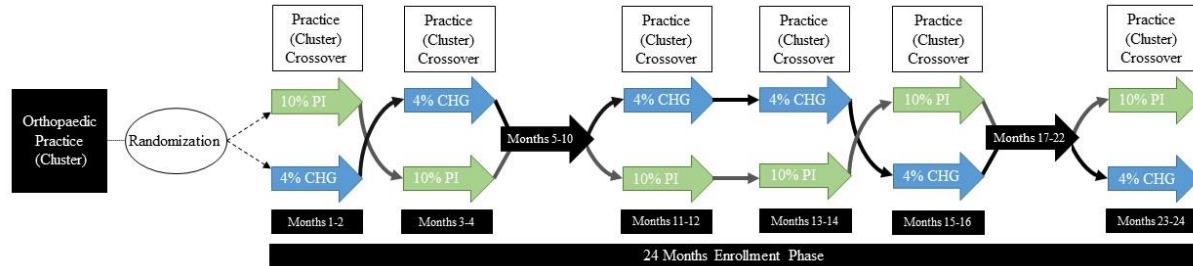

343  
344 **Figure 1: Randomized Treatment Allocation, Cluster Crossover, and Recruitment**  
345

346 **3.2 Pragmatic-Explanatory Continuum**

347 In accordance with recommended methodology standards, we have used the PRagmatic-  
348 Explanatory Continuum Indicator Summary (PRECIS-2) toolkit to evaluate the Aqueous-PREP  
349 trial design decisions to determine whether these decisions will lead to a study that answers,  
350 “Does this intervention work under usual conditions?” (pragmatic) versus “Can this intervention  
351 work under ideal conditions?” (explanatory). The PRECIS-2 tool uses a 5-point Likert scale in 9  
352 domains to evaluate the continuum of design choices. A domain score of 5 indicates “very  
353 pragmatic,” while a score of 1 suggests “very explanatory.” **Table 1** outlines the investigators’  
354 assessment of the trial design and the rationale for each assessed score and **Figure 2** displays the  
355 PRECIS-2 wheel.  
356

357 **Table 1: PRECIS-2 Score**

| Domain                         | Score | Rationale                                                                                                                                                                                                                                                                                                                                                                                                                                                                 |
|--------------------------------|-------|---------------------------------------------------------------------------------------------------------------------------------------------------------------------------------------------------------------------------------------------------------------------------------------------------------------------------------------------------------------------------------------------------------------------------------------------------------------------------|
| <i>Eligibility</i>             | 5     | Eligibility criteria are very broad and include all fracture patients that would be treated in all hospital environments.                                                                                                                                                                                                                                                                                                                                                 |
| <i>Recruitment</i>             | 5     | Recruitment of all consenting fracture patients treated at each participating hospital will be performed.                                                                                                                                                                                                                                                                                                                                                                 |
| <i>Setting</i>                 | 4     | Recruitment is occurring at multiple sites across the US and Canada; however, since most of the recruiting hospitals are regional referral centers the setting is “mostly pragmatic.”                                                                                                                                                                                                                                                                                     |
| <i>Organization</i>            | 5     | The interventions do not need an increase in providers or care delivery compared to the usual antiseptic care provided. For each antiseptic solution, a brief in-service training session will be provided to the clinical sites, as per any new product/procedure that is being introduced into an operating room.                                                                                                                                                       |
| <i>Flexibility (delivery)</i>  | 5     | The interventions will be delivered in the usual care manner with no advice on allowed co-interventions or strict protocols to ensure compliance.                                                                                                                                                                                                                                                                                                                         |
| <i>Flexibility (adherence)</i> | -     | This section is left blank according to PRECIS-2 guidance because the intervention is provided prior to patient consent and individual patient compliance is not an issue. If provider adherence is considered, the study design is rather pragmatic (4) because there will be limited encouragement to follow the manufacturer’s directions for use, other than periodic newsletters, investigator meetings, and possible provider survey during the recruitment period. |
| <i>Follow-up</i>               | 5     | All study follow-up is consistent with usual care.                                                                                                                                                                                                                                                                                                                                                                                                                        |
| <i>Primary outcome</i>         | 5     | The outcome has been validated by patients as being very relevant to the study participants and it does not require specialized expertise beyond the treating physician for diagnosis.                                                                                                                                                                                                                                                                                    |
| <i>Primary analysis</i>        | 5     | All available study data will be used for analysis following the intention to treat principle.                                                                                                                                                                                                                                                                                                                                                                            |

358  
359  
360

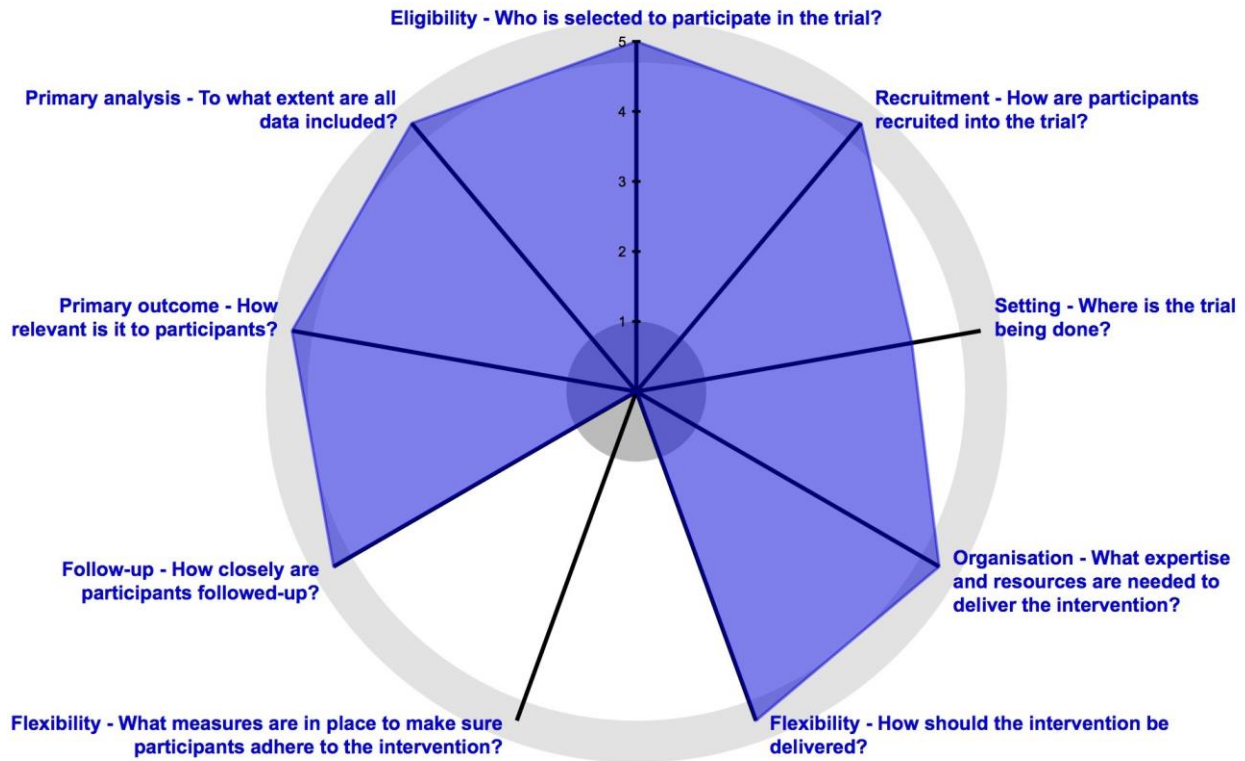

361  
362 **Figure 2: PRECIS-2 Wheel**

363  
364 **4.0 METHODS**

365  
366 4.1 Study Setting, Cluster Eligibility, and Selection of Clusters

367 This study will be coordinated by the Methods Center at the Center for Evidence-Based  
368 Orthopaedics (CEO), McMaster University, Hamilton, Ontario and by the Administrative Center  
369 within the Department of Orthopaedics at the University of Maryland School of Medicine, R  
370 Adams Cowley Shock Trauma Center, Baltimore, Maryland. Patients will be enrolled from at  
371 least 12 clinical sites. Clusters (orthopaedic practices within clinical sites) will be carefully  
372 screened prior to participation in the Aqueous-PREP study. Clinical site inclusion criteria are: 1)  
373 adequate research personnel infrastructure to manage the study; 2) adequate open fracture  
374 volume to complete enrollment within the study timeline (i.e., a minimum of 77 open fractures  
375 per year); 3) commitment from all or most orthopaedic surgeons to participate in the trial; and 4)  
376 ability to use the two aqueous-based preparation solutions. The exclusion criteria are: 1) lack of  
377 interest in the trial; 2) anticipated challenges with complying with the protocol; 3) conflicting  
378 studies, in the judgment of the Principal Investigators, that would inhibit patient participation;  
379 and 4) budgeting or contract constraints.

380  
381 The screening process will begin with potential clinical sites completing a feasibility  
382 questionnaire that asks about research experience and infrastructure, open fracture volume,  
383 current practice patterns, and interest in participating in the trial. Clinical sites that meet the  
384 eligibility criteria at this stage will be invited to participate in a series of teleconferences to  
385 review study and clinical logistics in detail with members of the study team. The Principal

386 Investigators and study personnel will further vet the clinical sites during these calls and will ask  
387 about hospital and patient demographics to ensure that a variety of fracture patient populations  
388 and referral patterns, ranging from large urban trauma centers to rural community hospitals, are  
389 included in the Aqueous-PREP study. Study personnel will document reasons for clinical site  
390 ineligibility. Upon selection, clinical sites will be asked to complete a questionnaire that will  
391 detail current surgeon preferences and practices for pre-operative surgical preparation techniques  
392 and co-interventions known to influence the incidence of SSIs (see Section 4.7).

393

#### 394 4.2 Eligibility Criteria

395 Broad eligibility criteria will be used to increase the generalizability of the trial.

396

397 The inclusion criteria are:

- 398 1. Patients 18 years of age or older.
- 399 2. Open fracture of the appendicular skeleton.
- 400 3. Received or will receive definitive fracture treatment with a surgical implant(s) (e.g.,  
401 internal fixation, external fixation, joint prosthesis, etc.).
- 402 4. Open fracture wound management that includes formal surgical debridement within 72  
403 hours of their injury.
- 404 5. Will have all planned fracture care surgeries performed by a participating surgeon or  
405 delegate.
- 406 6. Informed consent obtained.
- 407 7. Patient enrolled within 3 weeks of their fracture.

408

409 The exclusion criteria are:

- 410 1. Patients that did not or will not receive the allocated pre-operative surgical preparation  
411 solution due to a medical contraindication.
- 412 2. Received previous surgical debridement or management of their open fracture at a non-  
413 participating hospital or clinic.
- 414 3. Open fracture managed outside of the participating orthopaedic service (e.g., hand  
415 fracture managed by plastic surgeon).
- 416 4. Chronic or acute infection at or near the fracture site at the time of initial fracture surgery.
- 417 5. Burns at the fracture site.
- 418 6. Incarceration.
- 419 7. Expected injury survival of less than 90 days.
- 420 8. Terminal illness with expected survival less than 90 days.
- 421 9. Previous enrollment in a PREP-IT trial.
- 422 10. Currently enrolled in a study that does not permit co-enrollment.
- 423 11. Unable to obtain informed consent due to language barriers.
- 424 12. Likely problems, in the judgment of study personnel, with maintaining follow-up with the  
425 patient.
- 426 13. Excluded due to sampling strategy.

427

428 Additional eligibility considerations:

- 429 1. Patients with multiple open fractures will be eligible for inclusion. Study personnel will  
430 collect data on up to three open fracture regions. In patients with more than three open  
431 fracture regions, the treating surgeon will determine the three most severe open fractures.

432 For each open fracture, the entire injured anatomic region will be included.<sup>17</sup> Therefore, if  
 433 there are two open fractures that anatomically communicate, they will be considered  
 434 within the same region (e.g. within the shoulder region, forearm, etc.). Similarly,  
 435 adjacent closed fractures that anatomically communicate with the open fracture or are  
 436 treated within the same surgical incision will be included. Common examples of these  
 437 include forearm fractures, tibia/fibula fractures, and peri-articular fractures. The anatomic  
 438 joint region, adjacent fractures, and contiguous wounds will be defined at the time of  
 439 patient enrollment on the case report forms (CRFs).

- 440 2. All open fractures should be treated as per cluster randomization.
- 441 3. At the time of screening, patients who are in another study who meet eligibility criteria  
 442 are to be included in the Aqueous-PREP trial unless the other trial does not permit co-  
 443 enrollment.

#### 444 4.3 Recruitment Strategy

##### 445 4.3.1 Patient Screening and Consent

447 Patients 18 years of age or older who present to a recruiting hospital for treatment of an open  
 448 fracture will be screened for participation within 3 weeks of their fracture. To screen patients  
 449 presenting with an open fracture(s) for eligibility, designated study personnel at each clinical site  
 450 will develop a patient enrollment plan. This plan will typically consist of daily participation in  
 451 orthopaedic patient rounds and a review of daily listings of hospital admissions for patients with  
 452 open fractures. Upon identification, the study personnel will screen the patient for eligibility and if  
 453 eligible, approach them for informed consent. Study participants must be enrolled within 3 weeks of  
 454 their fracture(s) and enrollment may take place at any time within this window. If the patient is  
 455 unable to provide informed consent (e.g., due to their injury) at the time they were initially  
 456 identified, informed consent may be delayed until they are able to provide informed consent.  
 457 Alternatively, if the patient is unable to provide informed consent, informed consent may be  
 458 obtained from their proxy, with consent obtained from the patient when/if the patient is able to  
 459 provide consent. Allowing informed consent from a patient’s proxy healthcare decision maker will  
 460 reduce the risk of recruitment bias against the most severely injured patients. In addition, potentially  
 461 eligible patients will be approached to participate in the trial, even if they did not receive the  
 462 correct pre-operative antiseptic skin solution. This is consistent with the intention-to-treat  
 463 principle (ITT) and is necessary to maintain the prognostic balance achieved during the cluster  
 464 randomization. All screened patients will be classified as included, excluded, or missed. See  
 465 **Table 2** below for the Schedule of Events.

466 **Table 2: Schedule of Events**

| Assessment                                                              | Visit 1:<br>Enrollment | Visit 2:<br>6 weeks<br>post-fracture | Visit 3:<br>3 months<br>post-fracture | Visit 4:<br>6 months<br>post-fracture | Visit 5:<br>9 months<br>post-fracture | Visit 6:<br>12 months<br>post-fracture |
|-------------------------------------------------------------------------|------------------------|--------------------------------------|---------------------------------------|---------------------------------------|---------------------------------------|----------------------------------------|
| Eligibility<br>Screening                                                | •                      |                                      |                                       |                                       |                                       |                                        |
| Informed<br>Consent                                                     | •                      |                                      |                                       |                                       |                                       |                                        |
| Collection of<br>Demographic<br>and Fracture<br>Characteristics<br>Data | •                      |                                      |                                       |                                       |                                       |                                        |
| Collection of                                                           | •                      |                                      |                                       |                                       |                                       |                                        |

| Assessment                           | Visit 1:<br>Enrollment | Visit 2:<br>6 weeks<br>post-fracture | Visit 3:<br>3 months<br>post-fracture | Visit 4:<br>6 months<br>post-fracture | Visit 5:<br>9 months<br>post-fracture | Visit 6:<br>12 months<br>post-fracture |
|--------------------------------------|------------------------|--------------------------------------|---------------------------------------|---------------------------------------|---------------------------------------|----------------------------------------|
| Surgical Data                        |                        |                                      |                                       |                                       |                                       |                                        |
| Collection of Peri-Operative Data    | •                      |                                      |                                       |                                       |                                       |                                        |
| Collection of Study Event (SSI) Data | •                      | •                                    | •                                     | •                                     | •                                     | •                                      |
| Collection of Reoperation Data       | •                      | •                                    | •                                     | •                                     | •                                     | •                                      |
| Collection of SAE Data               | •                      | •                                    | •                                     | •                                     | •                                     | •                                      |

468 Informed consent and enrollment must occur within the 3 weeks (21 days) from the patient’s fracture (Day 0 is the  
469 date of the fracture).

470 Visits are to be completed at routine clinic visits. When necessary, visits may also be completed by telephone, text,  
471 email, standard mail, and/or a review of the participant’s medical record.

472 Follow-up visit windows touch so that participants will always fall into a specific window. The windows are: 4 to 8  
473 weeks (i.e., 28 to 56 days), 2 to 4.5 months (i.e., 57 to 137 days), 4.5 to 7.5 months (i.e., 138 to 228 days), 7.5 to 12  
474 months (i.e., 229 to 365 days), and greater than 12 months (i.e., 366 to 730 days), respectively, from the  
475 participant’s fracture.

476

#### 477 4.3.2 Enrollment Sampling Plan

478 When the volume of eligible patients exceeds a participating site’s ability to effectively enroll  
479 and follow all eligible patients, a sampling strategy may be implemented. A sampling strategy is  
480 available within the REDCap Cloud electronic data capture (EDC) system which will randomly  
481 determine whether an eligible patient should be approached for consent and inclusion in the  
482 study. The randomization software will use randomly selected block sizes consistent with the  
483 sampling ratio being used during the recruitment periods. Examples of potential random  
484 sampling strategies a site may use include:

485

- 486 1. For every three eligible patients, there will be one excluded eligible patient (3:1 ratio).
- 487 2. For every two eligible patients, there will be one excluded eligible patient (2:1 ratio).
- 488 3. For each eligible patient, there will be one excluded eligible patient (1:1 ratio).
- 489 4. For each eligible patient, there will be two excluded eligible patients (1:2 ratio).
- 490 5. For each eligible patient, there will be three excluded eligible patients (1:3 ratio).

491

492 The number of eligible patients approached for consent and inclusion in the study, and the  
493 number of eligible patients that are excluded due to a sampling strategy will be documented in  
494 the EDC system.

495

#### 496 4.4 Randomization Methods

497 Treatment allocation will be determined using a cluster-randomized crossover trial design. The  
498 order of treatment allocation for each orthopaedic practice (cluster) will be randomly assigned  
499 using a computer-generated randomization table. Each site will start with the initially allocated  
500 study solution and crossover to the other solution for their second recruitment period. This  
501 process of alternating treatments will repeat approximately every 2 months as dictated by the  
502 initial randomization. For sites that enroll for more than 1 year, the order of treatment allocation



503 may be reversed after 12 months to ensure equal distribution of each treatment across each  
504 calendar month in the study's duration (**Figure 1**). Randomization will be completed by  
505 personnel at the CEO Methods Center at the onset of the trial. Personnel from the Methods  
506 Center will notify personnel at each participating clinical site of their treatment allocation order.  
507 This will allow each participating clinical site to begin preparing for the first run-in period.  
508

#### 509 4.5 Blinding

510 The orthopaedic team (including the study coordinators) cannot be blinded to the treatment  
511 allocation as the antiseptic solutions are visually distinguishable and these individuals need to  
512 lead the implementation of the cluster-crossover protocol at their clinical site. The Adjudication  
513 Committee Members and data analysts will be blinded to the study treatment. All interpretation  
514 of study results will initially be done in a blinded manner by developing two interpretations of  
515 the results. One interpretation will assume treatment A is povidone-iodine, the other  
516 interpretation will assume it is CHG. Once the data interpretations for each assumption are  
517 finalized, the data will be unblinded and the correct interpretation will be accepted.<sup>18</sup>  
518

#### 519 4.6 Description of the Interventions

##### 520 4.6.1 Initial Run-In Phase

521 Prior to initiating patient recruitment, each clinical site will begin using their assigned pre-  
522 operative antiseptic skin solution for eligible open fracture surgeries (run-in period) to ensure  
523 that acceptable compliance is met before initiating participant enrollment. Acceptable  
524 compliance during the run-in phase will be defined as at least 15 eligible open fracture patients  
525 with >90% of eligible patients receiving the allocated antiseptic solution or a minimum of one  
526 month in duration. The run-in phase may be extended up to 3 months, as deemed necessary by  
527 the CEO Methods Center. Study personnel at each clinical site will document compliance with  
528 administering the allocated treatment during the run-in phase and submit this weekly to the CEO  
529 Methods Center. Specifically, the weekly reports will include the total number of eligible open  
530 fracture patients operated on, the proportion who received the assigned pre-operative antiseptic  
531 skin solution, and the proportion who did not receive the assigned pre-operative antiseptic skin  
532 solution along with details about the deviations (e.g., name of attending surgeon, solution used,  
533 rationale for not using the assigned pre-operative antiseptic skin solution). This portion of the  
534 study protocol is for quality assurance during the initial implementation of the trial procedures.  
535 Open fracture surgeries reviewed during the run-in phase will not be included in the trial.  
536 Similarly, these patients will not be approached for informed consent and no individual patient-  
537 level data will be submitted. CEO Methods Center personnel will review the weekly reports with  
538 each of the clinical sites and develop strategies, as needed, to ensure acceptable compliance  
539 during the run-in phase. This weekly communication will prevent any delays in transitioning to  
540 the participant enrollment phase.  
541

##### 542 4.6.2 First Intervention Phase

543 Once the initial run-in phase is completed, participant recruitment will begin with the clinical  
544 sites continuing to use the same pre-operative antiseptic skin solution for all eligible open  
545 fracture surgeries for a two-month period. Patients will receive the initially allocated treatment  
546 solution for all of their open fracture management surgeries, including repeat planned surgeries,  
547 even if a planned subsequent surgery occurs during a recruitment period using the non-allocated  
548 solution. Participating clusters will ideally be able to enroll a minimum of 77 open fracture

549 patients per treatment over the total study recruitment duration, and it is anticipated that most  
550 recruiting centers will exceed this minimum goal. Methods Center personnel will continue to  
551 monitor compliance with the assigned pre-operative antiseptic skin solution over the enrollment  
552 phase and work collaboratively with the clinical sites to minimize cases in which a patient  
553 receives the incorrect solution. These monitoring activities will coincide with site-specific  
554 procedures to maintain compliance for all patients, even those requiring multiple surgical  
555 procedures. If an open fracture requires multiple surgeries and the correct solution is not applied  
556 at each procedure, the patient will remain in the study and be analyzed using the allocated  
557 solution (ITT principle).

558

#### 559 4.6.3 Second Intervention Phase

560 Once the first intervention phase is completed, each site will crossover to the opposite study  
561 solution. There will be no run-in phase for the second solution and each site will need to develop  
562 local procedures to ensure a successful crossover. Example procedures to minimize carry-  
563 forward of first solution into the second solution phase include: 1) removing the bottles of the  
564 first solution from the orthopaedic operating rooms; 2) changing study posters and notifications  
565 within the operating rooms; and 3) performing the crossover during the middle of the week to  
566 provide a few days' notice to the operating room staff and to avoid contamination of recent open  
567 fracture patients returning for repeat procedures (e.g., weekend admissions). The enrollment  
568 goals and procedures will mirror the first intervention phase. Methods Center personnel will  
569 continue to monitor compliance with the assigned pre-operative antiseptic skin solution over the  
570 enrollment phase and work collaboratively with the clinical sites to reduce the risk of  
571 contamination.

572

#### 573 4.6.4 Special Considerations for Ongoing Treatment Crossovers

574 Treatment allocation will continue to alternate between the study solutions, as outlined above,  
575 for the remainder of study duration. Each intervention phase will be approximately 2 months in  
576 duration, as agreed upon by the local site and CEO Methods Center personnel. The duration may  
577 be modified to avoid crossovers on holidays, weekends, and other circumstances that could  
578 threaten a successful crossover. The expected recruitment duration for the trial is approximately  
579 24 months; however, some sites may have a shorter total recruitment duration (e.g., a  
580 participating site who joins the trial later, high volume clinical sites, etc.). The two-month  
581 enrollment periods will help account for seasonal variability in SSI incidence and their  
582 associated infectious organisms,<sup>19</sup> as each crossover period will cover a season. In addition, for  
583 those clinical sites enrolling beyond 12 months, the distribution of recruitment periods for each  
584 solution may be seasonally matched by reversing the order of the alternating allocation after 12  
585 months of recruitment.

586

#### 587 4.6.5 Evaluation of Site Performance and Removal of Clinical Sites

588 After every two recruitment periods (approximately every four months), each site will be  
589 evaluated for continued participation in the trial. Sites with <90% of eligible patients receiving  
590 the allocated solution, differential adherence between study solutions, <95% follow-up of the  
591 primary outcome, <90% follow-up of the secondary outcome, incomplete data submission, or  
592 other threats to data quality or the validity of the study may be withdrawn from the trial. In the  
593 event a site is withdrawn, data collection will be completed for all enrolled participants and these  
594 data will be included in the final study analysis.

595

596 4.6.6 Application of Pre-Operative Antiseptic Skin Solutions

597 Each solution will be applied to the injured area in accordance with the Food and Drug  
598 Administration (FDA) and Health Canada approved manufacturer's directions for use. While the  
599 application and minimum drying time for both study solutions are very similar, local study  
600 personnel will provide standardized in-service (training) for orthopaedic surgeons, operating  
601 room technicians, and nurses at each participating hospital prior to the run-in phases for each of  
602 the two randomized interventions. This training should include reviewing the manufacturers'  
603 directions for use to help minimize incorrect application at clinical sites that may not routinely  
604 use both solutions. In addition, the manufacturers may also provide demonstration videos and  
605 posters for continued refresher training for each solution.

606

607 The study protocol will mandate the antiseptic skin solution to be used in each intervention phase  
608 (Sections 4.4, 4.6.1, 4.6.2, 4.6.3, and 4.6.4); however, the protocol will remain pragmatic to  
609 variability in other co-intervention steps performed during the entire pre-operative skin  
610 preparation process performed in the operating room. Based on individual surgeon preference,  
611 this often includes mechanically removing visible dirt or debris with a scrub brush, and/or  
612 cleaning the limb with isopropyl alcohol or antiseptic scrub solution. These additional skin  
613 preparation steps will be permitted provided that: 1) the final skin preparation step prior to  
614 surgical incision is the application of the allocated antiseptic solution; and, 2) participating  
615 surgeons continue to use the same skin preparation co-interventions in both intervention phases.  
616 Co-interventions that contain the opposite active ingredient from the current intervention phase  
617 (e.g., using a chlorhexidine scrub brush during the povidone-iodine intervention phase, or  
618 conversely, using a povidone-iodine scrub during the chlorhexidine intervention phase) should  
619 be avoided; however, deviations from this recommendation will be permitted in order to  
620 maintain pragmatic *flexibility of delivery* and reflect real-world clinical practice. The details of  
621 all operating room antiseptic co-interventions will be documented.

622

623 The pragmatic nature of the cluster-randomized design will reduce the risk of crossovers  
624 between treatment groups because all consecutive patients during each recruitment period will  
625 receive the same treatment. Similarly, open fracture patients that require multiple planned  
626 surgeries for their injury will receive the same antiseptic skin solution during each subsequent  
627 procedure. Methods Center personnel will work with each of the clinical sites to develop  
628 strategies for minimizing crossovers. For example, for patients enrolled within 14 days of the  
629 anticipated end of a recruitment period or patients requiring multiple surgeries, study personnel  
630 will develop local procedures to identify these patients as study participants, and indicate the  
631 patient's allocated antiseptic solution in the medical chart and CRFs.

632

633 4.6.7 Povidone-Iodine Treatment

634 The povidone-iodine solution will contain 10% povidone-iodine (1% free iodine) in purified  
635 water as the only active ingredient. Products that list other inactive ingredients, including  
636 alcohol, will be permitted. The brand of the solution will be left to the discretion of the clinical  
637 site, although Methods Center personnel will confirm that the chosen solution is acceptable.  
638 Acceptable brands include, but are not limited to, Betadine® [Purdue Products, L.P. Stamford,  
639 CT] and Scrub Care® [Cardinal Health, Dublin, OH]. Clinical site personnel will store and  
640 handle the povidone-iodine solution as per the manufacturers' recommendations. Operating

641 room personnel will apply the solution to the operative site as the final preoperative skin  
642 antiseptics preparation immediately prior to commencing surgical fixation. They will apply the  
643 solution as per manufacturer's directions for use (e.g., technique of application, duration of  
644 application, drying time, drying techniques, replacement of draping, etc.).

#### 645 4.6.8 Chlorhexidine Gluconate Treatment

647 The CHG solution will contain 4% CHG in purified water as the only active ingredient. Products  
648 that list other inactive ingredients, including alcohol, will be permitted. The brand of the solution  
649 will be left to the discretion of the clinical site, although Methods Center personnel will confirm  
650 that the chosen solution is acceptable. Acceptable brands include, but are not limited to,  
651 Betasept® [Purdue Products, L.P. Stamford, CT] or Hibiclens® [Mölnlycke Health Care US  
652 LLC. Norcross, GA]. Clinical site personnel will store and handle the CHG solution as per the  
653 manufacturers' recommendations. Operating room personnel will apply the solution to the  
654 operative site as the final preoperative skin antiseptics preparation immediately prior to  
655 commencing surgical fixation. They will apply the solution as per manufacturer's directions  
656 (e.g., technique of application, duration of application, drying time, replacement of draping, etc.).

#### 657 4.7 Perioperative Co-Interventions

659 To optimize the internal validity of the trial findings, key details of co-interventions known to  
660 influence the incidence of SSIs will be documented. Hospitals typically implement standard  
661 procedures to achieve quality process benchmarks designed to minimize SSIs. These benchmarks  
662 are outlined in several similar guidelines such as the Joint Commission's Surgical Care  
663 Improvement Project 10 Core Measures to prevent SSI, the Society for Healthcare Epidemiology  
664 of America compendium to prevent SSI, and prevention guides from the Institute for Healthcare  
665 Improvement and the Association of periOperative Registered Nurses. While these guidelines  
666 mandate core benchmark processes to minimize SSI, it is not practical or generalizable for the  
667 trial protocol to standardize the steps taken or co-interventions performed to achieve these core  
668 measures, since each participating hospital will already have their own implemented procedures.  
669 This is the primary rationale for the cluster-crossover design, in which each participating hospital  
670 will act as its own control for the effect of co-interventions. Therefore, four key approaches to  
671 account for and limit the potential differential application of co-interventions during the study  
672 periods will be performed: 1) study periods for each intervention are kept relatively short to  
673 improve the likelihood that newly implemented co-interventions will be equally distributed  
674 across both treatment solutions; 2) encourage participating hospitals not to make changes to their  
675 existing infection prevention interventions during the study periods; 3) document the co-  
676 interventions being used in the hospitals throughout the study periods; and 4) record any changes  
677 in co-interventions that do occur if mandated by a participating hospital's administration. To this  
678 end, a monitoring tool containing a list of commonly applied prophylactic co-interventions being  
679 used at the participating clinical sites will be completed every four months to document any  
680 changes to their infection prevention strategies during the study period.

#### 681 4.8 Outcome Measures

##### 682 4.8.1 Primary Outcome

684 The primary outcome is SSI, guided by the CDC's National Healthcare Safety Network reporting  
685 criteria (2017),<sup>5</sup> which includes superficial incisional SSI within 30 days and deep incisional or  
686 organ/space SSI within 90 days of fracture surgery (**Table 3**). Since the management of some

687 open fractures may have more than one operative procedure as part of an intentionally staged  
 688 surgical plan (e.g., multiple irrigation and debridements, wound closures, temporary stabilization  
 689 surgeries, definitive fixation surgery), the primary outcome will include any SSI event from the  
 690 date of open fracture to the end of the 30- and 90-day post-operative surveillance periods from  
 691 their definitive fracture management surgery. For participants with multiple open fracture  
 692 regions, the date of the definitive fracture management surgery will be matched to the open  
 693 fracture region with the SSI.

694  
 695

**Table 3: CDC Surgical Site Infection Criteria**

| Outcome                                                                | Description                                                                                                                                                                                                                                                                                                                                                                                                                                                                                                                                                                                                                                                                                                                                                                                                                                                                                                                                                                                                                                                                                                                                                                                                                                                                                                                                                                                                                                                                                                                                                                                                                                                                                                                                                                                                                                                                                                                                                                                                                                                                                                                                                                                                                          |
|------------------------------------------------------------------------|--------------------------------------------------------------------------------------------------------------------------------------------------------------------------------------------------------------------------------------------------------------------------------------------------------------------------------------------------------------------------------------------------------------------------------------------------------------------------------------------------------------------------------------------------------------------------------------------------------------------------------------------------------------------------------------------------------------------------------------------------------------------------------------------------------------------------------------------------------------------------------------------------------------------------------------------------------------------------------------------------------------------------------------------------------------------------------------------------------------------------------------------------------------------------------------------------------------------------------------------------------------------------------------------------------------------------------------------------------------------------------------------------------------------------------------------------------------------------------------------------------------------------------------------------------------------------------------------------------------------------------------------------------------------------------------------------------------------------------------------------------------------------------------------------------------------------------------------------------------------------------------------------------------------------------------------------------------------------------------------------------------------------------------------------------------------------------------------------------------------------------------------------------------------------------------------------------------------------------------|
| <p><i>Superficial<br/>           Incisional<br/>           SSI</i></p> | <p>Date of event for infection occurs from the date of fracture to 30 days after the definitive fracture management surgery (where day 1 = the procedure date)<br/> <b>AND</b><br/>           involves only skin and subcutaneous tissue of the incision<br/> <b>AND</b><br/>           patient has at least one of the following:</p> <ol style="list-style-type: none"> <li>a. purulent drainage from the superficial incision.</li> <li>b. organisms identified from an aseptically-obtained specimen from the superficial incision or subcutaneous tissue by a culture or non-culture based microbiologic testing method which is performed for purposes of clinical diagnosis or treatment (e.g., not Active Surveillance Culture/Testing [ASC/AST]).</li> <li>c. superficial incision that is deliberately opened by a surgeon, attending physician or other designee and culture or non-culture based testing is not performed.</li> </ol> <p style="text-align: center;"><b>AND</b></p> <p>patient has at least one of the following signs or symptoms: pain or tenderness; localized swelling; erythema; or heat.</p> <ol style="list-style-type: none"> <li>d. diagnosis of a superficial incisional SSI by the surgeon or attending physician or other designee.</li> </ol> <p>The following do not qualify as criteria for meeting the definition of superficial SSI:</p> <ul style="list-style-type: none"> <li>• Diagnosis/treatment of cellulitis (redness/warmth/swelling), by itself, does not meet criterion “d” for superficial incisional SSI. Conversely, an incision that is draining or that has organisms identified by culture or non-culture based testing is not considered a cellulitis.</li> <li>• A stitch abscess alone (minimal inflammation and discharge confined to the points of suture penetration).</li> <li>• A localized stab wound or pin site infection- Such an infection might be considered either a skin (SKIN) or soft tissue (ST) infection, depending on its depth, but not an SSI<br/>           Note: A laparoscopic trocar site for an operative procedure is not considered a stab wound.</li> <li>• An infected burn wound is classified as BURN and is not an SSI.</li> </ul> |
| <p><i>Deep<br/>           Incisional<br/>           SSI</i></p>        | <p>The date of event for infection occurs from the date of fracture to 90 days after the definitive fracture management surgery (where day 1 = the procedure date)<br/> <b>AND</b><br/>           involves deep soft tissues of the incision (e.g., fascial and muscle layers)<br/> <b>AND</b><br/>           patient has at least one of the following:</p> <ol style="list-style-type: none"> <li>a. purulent drainage from the deep incision.</li> <li>b. a deep incision that spontaneously dehisces, or is deliberately opened or aspirated by a surgeon, attending physician or other designee, and organism is identified by a culture or non-culture based microbiologic testing method which is performed for purposes of clinical diagnosis or treatment (e.g., not Active Surveillance Culture/Testing [ASC/AST]) or culture or non-culture based microbiologic testing method is not performed</li> </ol> <p style="text-align: center;"><b>AND</b></p> <p>patient has at least one of the following signs or symptoms: fever (&gt;38°C); localized pain or tenderness. A culture or non-culture based test that has a negative finding does not meet</p>                                                                                                                                                                                                                                                                                                                                                                                                                                                                                                                                                                                                                                                                                                                                                                                                                                                                                                                                                                                                                                                                |

| Outcome                | Description                                                                                                                                                                                                                                                                                                                                                                                                                                                                                                                                                                                                                                                                                                                                                                                                                                                                                                                                                                                                                                                                                                                                                                                                                                                                                                                                                                                                                                    |
|------------------------|------------------------------------------------------------------------------------------------------------------------------------------------------------------------------------------------------------------------------------------------------------------------------------------------------------------------------------------------------------------------------------------------------------------------------------------------------------------------------------------------------------------------------------------------------------------------------------------------------------------------------------------------------------------------------------------------------------------------------------------------------------------------------------------------------------------------------------------------------------------------------------------------------------------------------------------------------------------------------------------------------------------------------------------------------------------------------------------------------------------------------------------------------------------------------------------------------------------------------------------------------------------------------------------------------------------------------------------------------------------------------------------------------------------------------------------------|
|                        | <p>this criterion.</p> <p>c. an abscess or other evidence of infection involving the deep incision that is detected on gross anatomical or histopathologic exam, or imaging test</p>                                                                                                                                                                                                                                                                                                                                                                                                                                                                                                                                                                                                                                                                                                                                                                                                                                                                                                                                                                                                                                                                                                                                                                                                                                                           |
| <i>Organ/Space SSI</i> | <p>Date of event for infection occurs from the date of fracture to 90 days after the definitive fracture management surgery (where day 1 = the procedure date)</p> <p><b>AND</b></p> <p>infection involves any part of the body deeper than the fascial/muscle layers, that is opened or manipulated during the operative procedure</p> <p><b>AND</b></p> <p>patient has at least one of the following:</p> <ul style="list-style-type: none"> <li>a. purulent drainage from a drain that is placed into the organ/space (e.g., closed suction drainage system, open drain, T-tube drain, CT guided drainage)</li> <li>b. organisms are identified from an aseptically-obtained fluid or tissue in the organ/space by a culture or non-culture based microbiologic testing method which is performed for purposes of clinical diagnosis or treatment (e.g., not Active Surveillance Culture/Testing [ASC/AST]).</li> <li>c. an abscess or other evidence of infection involving the organ/space that is detected on gross anatomical or histopathologic exam, or imaging test evidence suggestive of infection.</li> </ul> <p><b>AND</b></p> <p>meets at least one criterion for a specific organ/space infection site listed in Table 3 of the CDC Procedure-associated Module (summarized in Table 4 below).<sup>5</sup> These criteria are found in the Surveillance Definitions for Specific Types of Infections chapter.<sup>19</sup></p> |

696 \*The CDC criteria has been modified to include all definitive fracture management surgeries, as opposed to  
697 including only National Healthcare Safety Network procedures that require infection reporting.  
698

699 The CDC criteria for classifying SSIs will be followed. If multiple tissue levels are involved in  
700 the infection, the type of SSI (superficial incisional, deep incisional, or organ/space) reported  
701 will reflect the deepest tissue layer involved in the infection during the surveillance period. The  
702 date of event will be the date that the patient met criteria for the deepest level of infection: 1)  
703 Report infection that involves the organ/space as an organ/space SSI, whether or not it also  
704 involves the superficial or deep incision sites and 2) Report infection that involves the superficial  
705 and deep incisional sites as a deep incisional SSI. The most relevant National Healthcare Safety  
706 Network Organ/Space SSI classifications are summarized in **Table 4**.

707  
708

**Table 4: Relevant Organ/Space SSI Sites**

|                 |      |                            |
|-----------------|------|----------------------------|
| Organ/Space SSI | BONE | Osteomyelitis              |
|                 | JNT  | Joint or bursa infection   |
|                 | PJI  | Prosthetic joint infection |

709  
710  
711  
712  
713  
714  
715  
716  
717  
718  
719

All reported SSIs will be reviewed independently by an infection preventionist nurse and an orthopaedic surgeon who are members of the Adjudication Committee. Briefly, they will complete the review by examining all relevant information to determine if the SSI meets the CDC criteria of a superficial incisional SSI, deep incisional SSI, or organ/space SSI. The Committee will reach consensus on all reviewed SSIs. A hospital epidemiologist and infectious disease physician who are members of the Adjudication Committee will be available to provide guidance as needed. All members of the Adjudication Committee will be blinded to the treatment allocation.

720 4.8.2 Secondary Outcome

721 The secondary outcome is unplanned fracture-related reoperation within 12 months of the open  
722 fracture. This outcome has been used in previous open fracture trials and is defined as any  
723 unplanned surgery that occurred from the time of injury to 12 months post-injury that is  
724 associated with an infection at the operative site or contiguous to it, a wound-healing problem, or  
725 a fracture delayed union or nonunion. Common examples include any unplanned: 1) irrigation  
726 and debridement of surgical incisions or open fracture wounds due to infections or wound  
727 healing problems; 2) revision wound closure for dehiscence; 3) soft tissue coverage procedure  
728 for infected or necrotic wound; 4) fracture delayed union or nonunion surgery (such as bone  
729 grafting or implant exchange); and 5) reoperation for hardware or prosthesis failure due to  
730 infection or bone-healing problems. Removal of hardware for soft tissue prominence or  
731 periprosthetic fracture are common examples of reoperations that will not be considered outcome  
732 events. Two orthopaedic surgeons who are members of the Adjudication Committee will  
733 independently review all reported unplanned fracture-related reoperations to determine if they  
734 meet the criteria for being a study event. The Committee will reach consensus on all reviewed  
735 unplanned fracture-related reoperations.

736  
737 4.8.3 Exploratory Outcomes

738 Two exploratory definitions of infection will be used for sensitivity analyses of the primary  
739 comparison. The first exploratory outcome is fracture-related infection (FRI) within 12 months  
740 of the open fracture, defined by the confirmatory criteria for FRI outlined in a 2018 consensus  
741 definition.<sup>20</sup> The FRI criteria has been selected as an exploratory outcome because the CDC  
742 criteria has been criticized for failing to adequately account for the complexities of infections in  
743 traumatic fractures.<sup>20,21</sup> The FRI criteria attempts to improve upon the ability to detect infections  
744 specifically in fracture patients; however, this definition of FRI has not been fully validated or  
745 widely adopted.

746  
747 The confirmatory criteria include the presence of one or more of the following signs/symptoms:

- 748 1) Fistula, sinus or wound breakdown (with communication to the bone or the implant).  
749 2) Purulent drainage from the wound or presence of pus during surgery.  
750 3) Phenotypically indistinguishable pathogens identified by culture from at least two  
751 separate deep tissue/implant (including sonication-fluid) specimens taken during an  
752 operative intervention. In case of tissue, multiple specimens (3) should be taken, each  
753 with clean instruments (not superficial or sinus tract swabs). In cases of joint effusion,  
754 arising in a joint adjacent to a fractured bone, fluid samples obtained by sterile puncture  
755 may be included as a single sample.  
756 4) Presence of microorganisms in deep tissue taken during an operative intervention, as  
757 confirmed by histopathological examination using specific staining techniques for  
758 bacteria or fungi.

759  
760 The second exploratory outcome is SSI using the CDC criteria *within 12 months of the open*  
761 *fracture*. This secondary outcome will use the same diagnostic CDC reporting criteria for the  
762 primary outcome (**Tables 3 and 4**); however, the timeframe for this outcome will be expanded to  
763 include all SSIs that occur within 12 months of open fracture. Similar to the rationale for using  
764 the FRI outcome, and the recommendations for a minimum of 12 months follow-up for  
765 orthopaedic fracture outcomes<sup>22</sup>, this expanded timeframe will detect infections that occur

766 beyond the standard CDC surveillance reporting periods. This modification of the CDC  
767 reporting periods has been used in previous orthopaedic fracture trials.<sup>7,23</sup>  
768

769 An infection preventionist nurse and an orthopaedic surgeon member of the Adjudication  
770 Committee will review all reported SSIs to determine if they meet the FRI confirmatory criteria  
771 and / or the CDC criteria following the processes described above (see Section 4.8.1).  
772

#### 773 4.8.4 Data Collection and Participant Follow-up

774 After obtaining informed consent, study personnel will record the baseline data on the study  
775 CRFs. They will obtain this information directly from the participant or proxy, from the  
776 participant's medical chart, and the participant's treating orthopaedic surgeon and other health  
777 care providers. Data collection points include patient characteristics and injury details such as  
778 age, gender, comorbidities, mechanism of injury, socioeconomic status, and other injuries. Study  
779 personnel will also record the characteristics of up to three open fracture regions including the  
780 location, fracture severity, size of the wound, and degree of soft tissue injury using the Gustilo  
781 classification.<sup>8,17,24</sup>  
782

783 Surgical data and in-hospital data will be collected throughout the participant's hospital stay.  
784 Detailed information will be collected regarding the surgical management of the open fracture(s),  
785 including the time to irrigation and debridement. For each open fracture region, study personnel  
786 will record the use of staged debridements, the presence or lack of skin closure between  
787 debridements, and the use of local antibiotics at the wound. The method(s) of initial and final  
788 fracture management will also be captured. Lastly, study personnel will record the use of  
789 negative pressure wound therapy for open wounds or in the presence of open wounds surgically  
790 closed. These treatment decisions are hypothesized to be associated markers of injury severity  
791 and potential confounders of the study interventions.  
792

793 Study participants will be followed at 6 weeks, 3 months, 6 months, 9 months, and 12 months  
794 from their fracture. SSIs and unplanned fracture-related reoperations will be identified at the  
795 time of diagnosis/occurrence and/or during each participant's clinical assessment and medical  
796 record review that will occur during their routine outpatient clinic visits (**Table 2**). Detailed  
797 information on the SSI including the date of diagnosis, patient signs and symptoms, culture test  
798 results, method of treatment(s), and date of resolution will be collected. Study personnel will also  
799 record details about the participants' reoperations on the CRFs (e.g., date of reoperation, type of  
800 procedure, reason for procedure, etc.). In cases where the participant does not return to the clinic,  
801 study personnel will contact the participant by telephone, text, email, standard mail, and/or will  
802 review their medical record for any SSIs, and unplanned fracture-related reoperations. If the  
803 patient reports being treated at another hospital, study personnel will obtain the medical records  
804 from the other hospital. We have used this approach in our other multi-center trials (e.g.,  
805 SPRINT, TRUST, FLOW, FAITH, HEALTH, etc.).<sup>7,23,25-27</sup>  
806

807 To ensure research participant safety, serious adverse events (SAEs) will be documented at each  
808 follow-up visit and promptly submitted to the Methods Center and the local or central  
809 Institutional Review Board (IRB) or Research Ethics Board (REB) as per the required reporting  
810 processes.  
811



812 Several strategies may be used to maximize follow-up including: 1) at the time of enrollment,  
813 each participant will provide their own telephone number, as well as the name and address of a  
814 primary care physician, and the names and phone numbers of three people at different addresses  
815 with whom the participant does not live with and who are likely to be aware of the participant's  
816 whereabouts; 2) participants will receive a reminder card upon discharge for their next follow up  
817 visit by the clinical site study personnel; 3) participants will receive text message reminders; 4)  
818 follow-up will coincide with normal surgical fracture clinic visits; and 5) if a participant refuses  
819 or is unable to return for the follow-up assessment, study personnel will determine his/her status  
820 with regard to major study outcomes by telephone, text, or email contact with the participant or  
821 the provided alternate contacts. Given these are standard of care visits and the participants will  
822 be receiving ongoing orthopaedic care for their acute fractures, minimal loss to follow-up is  
823 expected. Using these techniques, we expect greater than 95% follow-up at 3 months and 90%  
824 follow-up at 12 months post-fracture.

825

826 Participants will not be deemed lost to follow-up until the 12-month visit is overdue and all  
827 attempts to contact the participant have been exhausted. Participants will not be withdrawn from  
828 the study if the study protocol was not adhered to (e.g., allocated treatment not received, missed  
829 follow-up visits, etc.). The reasons for participants being withdrawn from the study will be  
830 documented (e.g., withdrawal of consent or lost to follow up).

831

## 832 **5.0 STATISTICAL PLAN**

833

### 834 5.1 Sample Size Determination

835 The overall objective of the trial is to determine the most effective aqueous pre-operative  
836 antiseptic skin solution for use during open fracture management. This will be achieved by  
837 comparing the effectiveness of 10% povidone-iodine versus 4% CHG surgical skin preparations.  
838 The primary outcome is the occurrence of SSI, as per the adapted CDC criteria (**Table 3**).<sup>5</sup> The  
839 secondary outcome is the occurrence of unplanned fracture-related reoperations within 12  
840 months of injury. The sample size was calculated for the primary comparison between  
841 proportions of patients with SSI in each treatment group; however, it is expected that this  
842 estimate will also provide adequate power for the secondary outcome (unplanned fracture-related  
843 reoperation) because the baseline incidence (13%) and effect size for the reoperation outcome  
844 are expected to be similar to the SSI estimates.<sup>7</sup>

845

846 Assuming an ITT principle for the analysis, the sample size was calculated based on a cluster  
847 crossover design with the cluster as the unit of randomization and the patient as the unit of  
848 analysis. For complex study designs, such as a cluster-randomized crossover trial, simple  
849 formulas to calculate sample size or power may not capture the expected variability from the  
850 observed data.<sup>28</sup> Simulation methods were used to obtain empirical power calculations based on a  
851 feasible number of recruiting clusters and the expected number of open fracture patients.<sup>28</sup> The  
852 simulation estimates are designed to detect a difference between the treatment groups,  
853 accounting for between hospital variability inherent to a cluster-crossover trial design. We have  
854 assumed that the povidone-iodine solution will achieve a 0.65 risk ratio for SSI with a 12.5% SSI  
855 baseline incidence.<sup>1,3,7</sup> This represents approximately a 4% absolute risk reduction in SSI and  
856 reoperation. This effect was deemed more conservative than data reported by Swenson et al. and  
857 was consistent with feasible recruitment goals.<sup>4</sup>

858  
859  
860  
861  
862  
863  
864  
865  
866  
867  
868  
869  
870  
871  
872  
873  
874

Recent simulation data suggest that increasing the number of period crossovers can increase the statistical power of a given sample size.<sup>29</sup> To ensure the most conservative sample size estimate, we have based our sample size assumptions using a single crossover, 2 period design. The initial power estimate assumed 10 recruiting clusters, a 10% loss to follow-up rate,<sup>7</sup> and applying the between-cluster variance of 0.095 observed in the FLOW trial. Based on enrollment of a minimum of 1,540 open fracture patients, greater than 80% power would be achieved. Subsequent to the initial power calculations, the early trial experience demonstrated a need to increase the number of clusters to obtain a feasible recruitment pace. As a result, a minimum of 12 clusters will enroll participants into Aqueous-PREP. The increase in clusters results in a marginal increase in power (~2%).

**Table 5** below outlines the summary of the initial sample size assumptions that yield ≥80% power to detect difference between the treatments. These sample size estimates are rounded up to the nearest multiple of 20 to ensure balance among the clinical sites and two interventions.

**Table 5: Sample Size Assumptions**

| Baseline SSI Risk | 10% Povidone-Iodine Risk Ratio | 10% Povidone-Iodine Odds Ratio | Sample Size | Sample Size Increased by 10% |
|-------------------|--------------------------------|--------------------------------|-------------|------------------------------|
| 10.0%             | 0.62                           | 0.59                           | 1600        | 1760                         |
| 10.0%             | 0.65                           | 0.63                           | 1960        | 2100                         |
| 10.0%             | 0.67                           | 0.65                           | 2200        | 2420                         |
| 10.0%             | 0.70                           | 0.68                           | 2600        | 2860                         |
| 12.5%             | 0.62                           | 0.59                           | 1300        | 1440                         |
| 12.5%             | 0.65                           | 0.62                           | 1400        | 1540                         |
| 12.5%             | 0.67                           | 0.64                           | 1600        | 1760                         |
| 12.5%             | 0.70                           | 0.67                           | 1800        | 1980                         |
| 14.0%             | 0.62                           | 0.58                           | 1200        | 1320                         |
| 14.0%             | 0.65                           | 0.61                           | 1300        | 1440                         |
| 14.0%             | 0.67                           | 0.64                           | 1500        | 1660                         |
| 14.0%             | 0.70                           | 0.67                           | 1800        | 1980                         |

875 **Note:** \* Between cluster ICC = 0.028; Between cluster variance\* = 0.095; Between period variance = 0; Number of  
876 clusters = 10; Number of periods = 2; Alpha = 0.05  
877

## 878 5.2 Statistical Methods

### 879 5.2.1 Analysis Plan Overview

880 A detailed statistical analysis plan will be published prior to the completion of the trial. The  
881 analysis and reporting of the results will follow the CONSORT guidelines for reporting of both  
882 pragmatic trials<sup>30</sup> and cluster-randomization trials.<sup>31</sup> The process of patient enrollment and flow  
883 throughout the study will be summarized using a flow-diagram. Patient demographics and  
884 baseline outcome variables will be summarized using descriptive summary measures expressed  
885 as mean (standard deviation) or median (interquartile range) for continuous variables depending  
886 on the distribution, and number (percent) for categorical variables.<sup>32</sup> An ITT principle will be  
887 adopted to analyze all outcomes and the unit of analysis will be the individual patients. Missing  
888 data will be assumed to be missing at random and will be handled with multiple imputation.<sup>33,34</sup>  
889

890 The primary analysis will compare the treatment groups on the SSI outcome and the secondary  
891 analysis will compare the unplanned fracture-related reoperation outcome. The secondary

892 comparison will be conducted in accordance with best practice guidelines for secondary  
 893 analyses. For all models, the results will be expressed as relative measure of effect (odds, risk, or  
 894 hazard ratios) and corresponding two-sided 95% confidence intervals.

895  
 896 5.2.2 Analysis of the Study Outcomes

897 Adopting an ITT principle, multilevel regression models will be used. Correlation structures will  
 898 be fit based on the observed between cluster and between period effects. A robust sandwich  
 899 estimator will be used to analyze the primary and secondary outcomes.

900  
 901 For the primary outcome, SSI will be the dependent variable and the antiseptic solution  
 902 (treatment group) will be the independent variable. For the secondary outcome, unplanned  
 903 fracture-related reoperation will be the dependent variable and the antiseptic solution (treatment  
 904 group) will be the independent variable. For both analyses, multiple imputation will be used to  
 905 handle missing data.<sup>34</sup>

906  
 907 As the optimal methods for analyzing cluster crossover trials continue to evolve, the final  
 908 statistical modeling technique to be used will be determined in accordance with contemporary  
 909 best practices prior to the completion of participant follow-up. A separate Statistical Analysis  
 910 Plan will be developed prior to study closeout. **Table 6** below shows a summary of the study  
 911 outcomes, corresponding hypotheses, and currently proposed methods of analysis.

912  
 913 **Table 6: Summary of Outcome Analysis Plan**

| Objective                                                                                                                                                                | Outcome                                |        | Hypothesis                                          | Method of Analysis           |
|--------------------------------------------------------------------------------------------------------------------------------------------------------------------------|----------------------------------------|--------|-----------------------------------------------------|------------------------------|
|                                                                                                                                                                          | Name                                   | Type   |                                                     |                              |
| To determine the effect of 10% povidone-iodine versus 4% CHG pre-operative antiseptic skin solutions on the incidence of SSI and unplanned fracture-related reoperation. | SSI                                    | Binary | 10% povidone-iodine will be more effective than CHG | Multi-level regression model |
|                                                                                                                                                                          | Unplanned Fracture-Related Reoperation | Binary | 10% povidone-iodine will be more effective than CHG | Multi-level regression model |

914 **Note:** CHG = 4% chlorhexidine gluconate; SSI = Surgical Site Infection

915  
 916 5.2.3 Subgroup Analyses

917 Three subgroup analyses will be performed. The primary subgroup will be defined by the  
 918 severity of open fracture (Gustilo-Anderson type I or II versus III).<sup>8</sup> Secondary subgroups will  
 919 include: i) upper extremity versus lower extremity open fractures; and ii) none, minimal, or  
 920 surface contamination versus contamination embedded in bone or deep soft tissues.<sup>17</sup> These  
 921 analyses will be performed by comparing the effect estimates in both groups (interaction effect).  
 922 We hypothesize that effect will differ by subgroup. These analyses will be approached and  
 923 reported in accordance with best practices and guidelines for subgroup analyses.<sup>35-38</sup> **Table 7**  
 924 below shows a summary of the subgroup analysis objectives, corresponding outcomes,  
 925 hypotheses, and methods of analysis.

926  
 927 **Table 7: Summary of Subgroup Analysis Plan**

| Objective | Outcome | Hypothesis | Method of |
|-----------|---------|------------|-----------|
|-----------|---------|------------|-----------|

|                                                                                | Name                                         | Type   |                                                                                                                                                                                                      | Analysis                             |
|--------------------------------------------------------------------------------|----------------------------------------------|--------|------------------------------------------------------------------------------------------------------------------------------------------------------------------------------------------------------|--------------------------------------|
| <b>Primary</b>                                                                 |                                              |        |                                                                                                                                                                                                      |                                      |
| Severity of open fracture (Gustilo-Anderson Type I or II vs. Type III)         | SSI / Unplanned Fracture-Related Reoperation | Binary | 10% povidone-iodine will be associated with a larger reduction in odds for SSI and reoperation than CHG in more severe fractures                                                                     | Interaction of treatment by subgroup |
| <b>Secondary</b>                                                               |                                              |        |                                                                                                                                                                                                      |                                      |
| Upper extremity vs. lower extremity fractures                                  | SSI / Unplanned Fracture-Related Reoperation | Binary | 10% povidone-iodine will be associated with a larger reduction in odds for SSI and reoperation than CHG in lower extremity compared to upper extremity fractures                                     | Interaction of treatment by subgroup |
| None, minimal, or surface wound contamination vs. embedded wound contamination | SSI / Unplanned Fracture-Related Reoperation | Binary | 10% povidone-iodine will be associated with a larger reduction in odds for SSI and reoperation than CHG in embedded contaminated wounds compared to wounds with no, minimal or surface contamination | Interaction of treatment by subgroup |

**Note:** CHG = 4% chlorhexidine gluconate; SSI = Surgical Site Infection

928  
929

#### 5.2.4 Sensitivity Analyses

930  
931  
932  
933  
934  
935

Assessment of the sensitivity or robustness of the findings to the key assumptions is essential in trials. The following sensitivity analyses may be conducted to explore the effects of alternative analysis models, alternative missing data approaches, balancing prognostic imbalance, as-treated analyses, variability in co-interventions, and alternative definitions of SSI.

936  
937  
938  
939

1) *Using different analysis models:* There are several methods for analyzing cluster randomized crossover trials.<sup>34,39</sup> Therefore, our sensitivity analyses will explore alternative multi-level models with different correlation structures for the error.<sup>35,39,38</sup>

940  
941  
942  
943  
944  
945  
946  
947

2) *Different methods of handling missing data:* There are several methods of handling missing data in trials.<sup>39</sup> Multiple imputation assumes that the data are missing at random—an assumption that is not verifiable in practice. Other imputation methods will be used such as worst case scenario to impute missing data and assess the robustness of the results.<sup>40</sup> For the worst case scenario analysis, we will assume that a random proportion of participants lost to follow-up experienced a study event. For this sensitivity analysis, the proportion assumed to experience a study event will be equivalent to the upper confidence interval of the observed pooled event rate for each study outcome.

948  
949  
950  
951  
952  
953  
954  
955  
956

3) *Adjusted analyses for prognostic imbalance:* We will also perform sensitivity analyses that assume prognostic imbalance between the two treatment groups based on the following key variables known to be risk factors for SSI or reoperation after open fracture: Gustilo fracture type, lower extremity fracture, wound contamination, time from injury to first debridement, antiseptic wound dressing in the emergency department, method of fixation, wound closure at initial debridement, age, work-related injury, and employment status.<sup>16</sup> Adjusted analyses including the above risk factors and treatment group as independent variables will be performed for the SSI and reoperation outcomes.

957  
 958 4) *As-treated analyses*: The proportion of surgical procedures receiving the incorrect, non-  
 959 allocated antiseptic solution will be reported. “As-treated” sensitivity analyses will be performed  
 960 using the solution received as the independent variable. For participants that were treated in a  
 961 single open fracture surgery, they will be analyzed using the antiseptic solution received. For  
 962 participants who received multiple open fracture surgeries, two analyses will be performed.  
 963 First, the antiseptic solution used in their last surgery prior to a study outcome event will define  
 964 their study treatment. For the second analysis, the antiseptic solution received in the majority of  
 965 their fracture surgeries will define their study treatment. Participants who were treated with  
 966 multiple open fracture management surgeries, but received equal exposure to both treatment  
 967 solutions (e.g. one surgery with CHG and one surgery with iodine), will be analyzed within their  
 968 originally allocated treatment group.

969  
 970 5) *Co-intervention variability*: Selective censoring of one or more clusters and / or treatment  
 971 periods will be performed to further explore between-cluster and between-period variability  
 972 identified in the primary and secondary outcome comparisons. These analyses will be used to  
 973 explore the robustness of the study conclusions in the context of measured practice variations in  
 974 co-interventions that differ between participating sites and / or evolve over the duration of the  
 975 study recruitment. Results that are sensitive to the removal of a cluster(s) and / or period(s) will  
 976 be reported, along with potential clinical hypotheses that are supported by the measured clinical  
 977 practice variation.

978  
 979 6) *Exploratory SSI definitions*: The above analyses (See Section 5.2.2) will be repeated for the  
 980 primary comparison using the FRI outcome and the CDC definition within 1 year of injury to  
 981 determine if the study conclusions are sensitive to alternative definitions of SSI.

982  
 983 **Table 8** below shows a summary of the objectives, corresponding outcomes, hypotheses, and  
 984 methods for each potential sensitivity analysis.

985  
 986 **Table 8: Summary of Sensitivity Analysis Plan**

|   | Objective                       | Outcome           |        | Hypothesis                                                     | Method of Analysis                                                                |
|---|---------------------------------|-------------------|--------|----------------------------------------------------------------|-----------------------------------------------------------------------------------|
|   |                                 | Name              | Type   |                                                                |                                                                                   |
| 1 | Different analysis models       | SSI / Reoperation | Binary | 10% povidone-iodine will be more effective than CHG            | Multi-level regression models with different correlation structures               |
| 2 | Different missing data approach | SSI / Reoperation | Binary | 10% povidone-iodine will be more effective than CHG            | Multi-level regression models with missing data imputed using worst-case scenario |
| 3 | Baseline prognostic imbalance   | SSI / Reoperation | Binary | 10% povidone-iodine will be more effective than CHG            | Multi-level regression models with prognostic variables & treatment group         |
| 4 | As-treated analysis             | SSI / Reoperation | Binary | 10% povidone-iodine will be more effective than CHG            | Multi-level regression models using “as treated” treatment group                  |
| 5 | Co-intervention variability     | SSI / Reoperation | Binary | Cluster- and period-variability is related to co-interventions | Censoring of cluster(s) and/or period(s) with differences in co-interventions     |

|   | Objective                   | Outcome                     |        | Hypothesis                                          | Method of Analysis            |
|---|-----------------------------|-----------------------------|--------|-----------------------------------------------------|-------------------------------|
|   |                             | Name                        | Type   |                                                     |                               |
| 6 | Exploratory SSI definitions | FRI / CDC SSI within 1 year | Binary | 10% povidone-iodine will be more effective than CHG | Multi-level regression models |

987 **Note:** CHG = 4% chlorhexidine gluconate; SSI = Surgical Site Infection; FRI = Fracture Related Infection; CDC =  
988 Centers for Disease Control and Prevention.

989

990 5.2.5 Interim Analysis

991 No formal interim analyses are planned and the trial will not be stopped early for benefit. The  
992 Data and Safety Monitoring Committee (see Section 7.5.5) will review frequent safety reports  
993 and will collectively make judgments on the strength of evidence and the absolute magnitude and  
994 seriousness of any safety signals.<sup>41</sup> The Data and Safety Monitoring Committee may make  
995 recommendations regarding the trial.

996

997 **6.0 DATA MANAGEMENT**

998

999 6.1 Case Report Forms and Data Transmission

1000 Clinical sites will be provided with the trial CRFs prior to initiation of enrollment. Research  
1001 personnel at each clinical site will submit the required data, as detailed on the CRFs, to the  
1002 Methods Center using the REDCap Cloud electronic data capture system. Clinical site personnel  
1003 will receive a unique login and password for the REDCap Cloud system and will be able to view  
1004 and modify data for participants recruited at their clinical site.

1005

1006 6.2 Data Integrity

1007 The REDCap Cloud system uses a variety of mechanisms for checking data at the time of entry  
1008 including skip logic, range checks, and data type checks. Upon receipt of new data, the personnel  
1009 at the Methods Center will query all missing, implausible, or inconsistent data. Clinical site  
1010 personnel will be able to review of open queries in the system and will be required to respond  
1011 promptly.

1012

1013 **7.0 ETHICS AND DISSEMINATION**

1014

1015 7.1 Research Ethics Approval

1016 The McMaster University Methods Center and all participating clinical sites will receive REB or  
1017 IRB approval prior to commencing participant enrollment. A central IRB and local IRBs/REBs  
1018 will be used based on clinical site logistics. Prior to local commencement of the study, each  
1019 clinical site will provide the Methods Center with a copy of their ethics approval.

1020

1021 7.2 Consent

1022 In many cluster randomized comparative effectiveness trials, a waiver of consent is obtained  
1023 from the IRB of Record. The rationale for the waiver of consent is that all patients will receive  
1024 treatments that are effective and within standards of care, they will receive one of the study  
1025 treatments as part of their routine care regardless of study participation, the data collection is  
1026 minimal and obtained from the patient’s medical records, the trial involves no more than  
1027 minimal risk to the patient, and that the waiver of consent will not adversely affect the rights and  
1028 welfare of the patient. Most of these concepts apply to the current trial, as the Aqueous-PREP

1029 trial is comparative effectiveness research where patients will receive one of the preoperative  
1030 antiseptic skin solutions regardless of their participation in the study. Additionally, patients are  
1031 not included in the decision-making process for the choice of antiseptic preparation solution,  
1032 and, in most situations, they are not even aware of which solution is used. However, in contrast  
1033 to many cluster randomized crossover trials, Aqueous-PREP study personnel will need to contact  
1034 participants directly to collect baseline and outcome data, as this information cannot be reliably  
1035 obtained from the patients' medical records. Therefore, study personnel will obtain informed  
1036 consent from patients prior to data collection. This consent process will allow study participants  
1037 to be informed about the study rationale and provide consent for ongoing surveillance and data  
1038 collection.

1039  
1040 To increase enrollment and to avoid missing potential study participants, the consent process  
1041 may take place up to 3 weeks post-fracture. Consultation during the study design phase with  
1042 IRB members and patient advisors confirmed the acceptability of this flexible approach, where  
1043 consent may be obtained after the intervention. The primary rationale for allowing consent after  
1044 the intervention is consistent with the waiver of consent principles outlined above, but in  
1045 addition, the patient and IRB stakeholders recognized that obtaining consent prior to the patient's  
1046 first surgery could add undue decision making stress to a patient who is awaiting surgical  
1047 management of a serious extremity injury; allowing consent after their surgery would likely  
1048 facilitate an improved consent process.

1049  
1050 The consent process will typically take place in the patient's hospital room or in the outpatient  
1051 fracture clinic, either before or after the patient has had surgery(ies) to manage their open  
1052 fracture. If the patient is unable to provide informed consent (e.g., due to their injury, language  
1053 restrictions) within 3 weeks of their fracture, informed consent will be obtained from their proxy.  
1054 In addition, if a patient has been discharged from hospital prior to being invited to participate in  
1055 the study, a delegated member of the clinical care team may obtain their consent by telephone, as  
1056 approved by the IRB of Record.

1057  
1058 To obtain informed consent, delegated study personnel should follow the below procedures:

- 1059 • Present study information in a manner that is understandable to the potential  
1060 participant/proxy.
- 1061 • Discuss the study with the potential participant/proxy and answer any questions he or  
1062 she asks.
- 1063 • Allow the potential participant/proxy an opportunity to discuss participation with  
1064 their family, friends, or family physician, if desired.
- 1065 • Confirm that the participant/proxy understands the risks and benefits of participating  
1066 in the study and that their participation is voluntary.
- 1067 • Complete and obtain signatures for informed consent form and obtain contact  
1068 information from the participant/proxy.
- 1069 • Provide /send the participant/proxy with a paper/electronic copy of the signed consent  
1070 form.

1071 Consent may be obtained electronically or using pen and paper consent forms, as approved by  
1072 the IRB of Record.

1073 The process of obtaining and documenting informed consent will be completed in accordance  
1074 with local Good Clinical Practice recommendations. Consent procedures and forms, and the

1075 communication, transmission and storage of patient data will comply with the IRB of Record and  
1076 Department of Defense requirements for compliance with The Health Insurance Portability and  
1077 Accountability Act.

1078  
1079 Upon providing informed consent, study participants will be followed for 12 months from their  
1080 fracture. Given the short follow-up time, the need for a regular reassessment of consent will not  
1081 apply; however, participants may withdraw their consent at any time.

### 1082 1083 7.3 Confidentiality

1084 Information about study participants will be kept confidential and will be managed in accordance  
1085 with the below rules:

- 1086 • All study-related information will be stored securely.
- 1087 • All study participant information will be stored in locked file cabinets and accessible  
1088 only to study personnel.
- 1089 • All paper and electronic CRFs will be identified only by a coded participant number  
1090 and initials.
- 1091 • All databases will be password protected.

1092  
1093 In the event that a participant revokes authorization to collect or use personal health information,  
1094 the clinical site retains the ability to use all information collected prior to the revocation of  
1095 participant authorization. For participants who have revoked authorization to collect or use  
1096 personal health information, attempts should be made to obtain permission to collect at least vital  
1097 status (i.e., primary outcome data) at the end of their scheduled study period.

### 1098 1099 7.4 Protocol Amendments

1100 Any amendments to the study protocol which may affect the conduct of the study or the potential  
1101 safety of or benefits to participants (e.g., changes to the study objectives, study design, sample  
1102 size, or study procedures) will require a formal amendment to the protocol. Any protocol  
1103 amendments will be approved by the Principal Investigators and will require approval by the  
1104 McMaster University REB, the Central IRB, local IRBs/REBs, as well as the funders (as  
1105 needed). Clinical sites will also be required to submit amendment requests to their IRB of Record  
1106 to obtain approval for the amendment and to provide the Methods Center with a copy of this  
1107 approval. Administrative changes (e.g., minor corrections or clarifications that have no effect on  
1108 the way the study is conducted) will not need to undergo a formal amendment process.

### 1109 1110 7.5 Adverse Event Reporting and Definitions

#### 1111 7.5.1 Serious Adverse Event (SAE)

1112 A SAE is any adverse event that is any of the following:

- 1113 • Fatal
- 1114 • Life threatening
- 1115 • Requires or prolongs hospital stay
- 1116 • Results in persistent or significant disability or incapacity
- 1117 • A congenital anomaly or birth defect
- 1118 • An important medical event



1119  
1120  
1121  
1122  
1123  
1124  
1125  
1126  
1127  
1128  
1129  
1130  
1131  
1132  
1133  
1134  
1135  
1136  
1137  
1138  
1139  
1140  
1141  
1142  
1143  
1144  
1145  
1146  
1147  
1148  
1149  
1150  
1151  
1152  
1153  
1154  
1155  
1156  
1157  
1158  
1159  
1160  
1161  
1162

### 7.5.2 Unanticipated Problems Resulting in Risk to Participant or Others

Any incident, experience, or outcome that meets the following criteria:

- Unexpected in nature, severity, or frequency (e.g., not described in study-related documents such as the ethics-approved protocol or consent form, etc.).
- Related or possibly related to participation in the research (i.e., possibly related means there is reasonable possibility that the incident experience or outcome may have been caused by the procedures involved in the research).
- Suggests that the research places participants or others at greater risk of harm (including physical, psychological, economic, or social harm).

### 7.5.3 Clinical Site Reporting: Notifying the Methods Center

Clinical sites are responsible for reporting SAEs to the Methods Center via the REDCap Cloud system. Significant new information on ongoing SAEs should also be provided promptly to the Methods Center via the REDCap Cloud system. Unanticipated problems resulting in risk to participants or others are also to be reported promptly to the Methods Center.

### 7.5.4 Clinical Site Reporting – IRB and REB

Clinical sites are responsible for reporting SAEs and unanticipated problems resulting in risk to participants or others to their local REB/IRB or the Central IRB in accordance with local reporting requirements. Copies of each report and documentation of ethic board notification and receipt will be kept in the clinical site’s study file.

### 7.5.5 Safety Monitoring

As per the FDA guidance document *the Establishment and Operation of Clinical Trial Data Monitoring Committees for Clinical Trial Sponsors*, a Data and Safety Monitoring Committee will oversee the safety of the trial participants and the overall conduct of the trial. The members of the Data and Safety Monitoring Committee will include two orthopaedic surgeons, an infectious disease expert, and a biostatistician. One orthopaedic surgeon will act as the Chair of the Committee. The Data and Safety Monitoring Committee will be responsible for safeguarding the interests of study participants, assessing the safety and efficacy of study procedures, and for monitoring the overall conduct of the study. The Data and Safety Monitoring Committee will frequently review enrollment and demographic summaries, listings of protocol deviations, and summaries and listings of SAEs. They will advise the Principal Investigators and study team on any concerns related to participant safety and trial conduct, and will make recommendations for the study to continue as designed, for study termination, for study continuation with major or minor modifications, or temporary suspension of enrollment until some uncertainty is resolved. We will develop a Data and Safety Monitoring Committee charter to guide the process.

### 7.6 Dissemination Policy

Results from the study will be submitted for publication regardless of whether there are significant findings. Every attempt will be made to ensure that the amount of time between completion of data collection and release of study findings are minimized.

1163 **8.0 DEPARTMENT OF DEFENSE REPORTING REQUIREMENTS**

1164 The following are the minimum reporting requirements with which the Principal Investigators  
1165 must comply. The protocol will not be initiated at Department of Defense-funded clinical sites  
1166 until written notification of approval of the research project is issued by the United States Army  
1167 Medical Research and Materiel Command (USAMRMC) Office of Research Protections (ORP)  
1168 Human Research Protection Office (HRPO).

- 1169 • Substantive modifications to the research protocol and any modifications that could  
1170 potentially increase risk to subjects must be submitted to the HRPO for approval prior to  
1171 implementation. The USAMRMC ORP HRPO defines a substantive modification as a  
1172 change in Principal Investigator, change or addition of an institution, elimination or  
1173 alteration of the consent process, change to the study population that has regulatory  
1174 implications (e.g. adding children, adding active duty population, etc), significant change  
1175 in study design (i.e. would prompt additional scientific review) or a change that could  
1176 potentially increase risks to subjects.
- 1177 • Any changes of the IRB used to review and approve the research will be promptly  
1178 reported to the USAMRMC ORP HRPO.
- 1179 • All unanticipated problems involving risk to subjects or others must be promptly reported  
1180 by telephone (301-619-2165), by email (usarmy.detrick.medcom-  
1181 usamrmc.other.hrpo@mail.mil), or by facsimile (301-619-7803) to the HRPO. A  
1182 complete written report will follow the initial notification. In addition to the methods  
1183 above, the complete report can be sent to the US Army Medical Research and Materiel  
1184 Command, ATTN: MCMR-RP, 810 Schreider Street, Fort Detrick, Maryland 21702-  
1185 5000.
- 1186 • Suspensions, clinical holds (voluntary or involuntary), or terminations of this research by  
1187 the IRB, the institution, the Sponsor, or regulatory agencies will be promptly reported to  
1188 the USAMRMC ORP HRPO.
- 1189 • A copy of the continuing review approval notification by the IRB of Record must be  
1190 submitted to the HRPO as soon as possible after receipt. Please note that the HRPO also  
1191 conducts random audits at the time of continuing review. Additional information and  
1192 documentation may be requested at that time.
- 1193 • The final study report, including any acknowledgement documentation and supporting  
1194 documents, must be submitted to the HRPO when available.
- 1195 • The knowledge of any pending compliance inspection/visit by the FDA, Department of  
1196 Health and Human Services Office of Human Research Protections, or other government  
1197 agency concerning this research, the issuance of Inspection Reports, FDA Form 483,  
1198 warning letters or actions taken by any regulatory agencies including legal or medical  
1199 actions and any instances of serious or continuing noncompliance with the regulations or  
1200 requirements, must be promptly reported to the HRPO.

1201  
1202 **9.0 SUB-STUDY: PATIENT EXPERIENCES IN THE AQUEOUS-PREP AND PREPARE**  
1203 **TRIALS**

1204  
1205 9.1 Introduction

1206 Patient and stakeholder involvement in the design of randomized controlled trials is increasingly  
1207 becoming recognized as an essential component of a trial’s success.<sup>42,43</sup> Patient and stakeholder  
1208 involvement (PSI) has been seen as the paradigm shift from research being done “to” or “for”

1209 patients, to research being performed “with” or “by” patients themselves.<sup>44</sup> PSI allows for  
1210 democratization of the research process and empowering patients throughout the entire research  
1211 process – from design through to knowledge dissemination.<sup>45</sup> Research has found that patients  
1212 and stakeholders are motivated to be involved in research for a wide variety of reasons, including  
1213 a desire to contribute to research for the benefit of others.<sup>46</sup>  
1214

1215 Prior research has argued that PSI enhances the focus of clinical trials on outcomes that are  
1216 relevant to patients themselves, thus increasing the utility of any research findings.<sup>47</sup>  
1217 Furthermore, PSI has been argued to improve recruitment and retention rates, while raising the  
1218 quality of research findings and ultimately helping with the dissemination of research findings.<sup>48</sup>  
1219 Lastly, PSI may be able to improve patient safety when patients are involved in safety reporting  
1220 in hospital settings.<sup>49</sup>  
1221

1222 Despite these findings, a recent systematic review estimates that far less than 1% of clinical trials  
1223 engage patients in any meaningful or active way.<sup>50</sup> From the onset of the PREP-IT trials (i.e. the  
1224 Aqueous-PREP and PREPARE trials), the PREP-IT investigators have engaged multiple patient-  
1225 partners and stakeholders in the design, conduct, and implementation of the PREP-IT trials. One  
1226 of our engagement goals is to identify ways in which we can better engage with PREP-IT study  
1227 participants. To support this goal, we seek to learn about PREP-IT participants’ experiences  
1228 within the PREP-IT trials. This knowledge will be used to improve the study team’s ability to  
1229 engage study participants and provide study information in a meaningful and accessible manner.  
1230 Additionally, the unique design of the PREP-IT trials (e.g., consent after the intervention,  
1231 minimal follow-up, minimal requirements for participants) provides a novel trial to investigate  
1232 this question. This led to the current sub-study.  
1233

## 1234 9.2 Rationale and Objectives

1235 One of the mandates of the PREP-IT program is to improve orthopaedic fracture research  
1236 through meaningful engagement with our patient-partners and stakeholders. The objective of  
1237 this sub-study is to learn about PREP-IT participants’ experiences with participating in the  
1238 Aqueous-PREP or PREPARE trial. The results of this sub-study will be used to develop  
1239 strategies to better engage research participants both in the PREP-IT trials as well as in future  
1240 clinical trials.  
1241

## 1242 9.3 Sub-Study Design

1243 This sub-study will consist of an exit survey that will be given to a subset of participants in the  
1244 PREP-IT trials. Select clinical sites participating in the Aqueous-PREP and / or PREPARE trial  
1245 will be invited to participate in the sub-study.  
1246

1247 The exit survey is comprised of 14 questions that includes multiple choice and brief open-ended  
1248 questions. All of the questions use clear and simple language written at or below a grade eight  
1249 reading level to enhance the validity of results. The survey length has been kept to a minimum  
1250 to maximize response rate and limit barriers that would affect its proper completion.  
1251

1252 The survey was created after reviewing the current literature and with input from the PREP-IT  
1253 investigators, research coordinators, patient-partners, and stakeholders. Engaging the larger  
1254 study team follows the PREP-IT philosophy of meaningful engagement, as well as helps to

1255 ensure that no vital questions were missed and that the survey wording is clear and easily  
1256 understandable to the target audience. The questionnaire was pre-tested on a sample of  
1257 convenience.

#### 1258 1259 9.4 Survey Participants and Distribution

1260 All potential substudy participants, or their proxies, will be required to provide informed consent  
1261 specifically for the substudy prior to completing the survey. Informed consent for the substudy  
1262 may be obtained at the time of enrollment in the Aqueous-PREP or PREPARE trial using  
1263 consent procedures described in sections 4.3.1 and 7.2, or in-person at a subsequent follow-up  
1264 visit or time of survey administration using a pen and paper consent form. The patient or proxy  
1265 must be provided with a copy of the signed informed consent form. All sites within the United  
1266 States of America must conduct their consenting process in accordance with HIPAA (Health  
1267 Insurance Portability and Accountability Act) regulations as approved by their institutions, and  
1268 sites in Canada must comply with the Personal Information Protection and Electronic Documents  
1269 Act (PIPEDA).

1270  
1271 Clinical sites participating in the sub-study will offer the survey to all eligible participants at the  
1272 time they complete their one-year follow up visit. The survey will be sent to participants either  
1273 through mail, email or RedCap Cloud, given to them on paper at a follow-up visit, or  
1274 administered over the phone, depending on each individual participant's preference. The  
1275 Research Coordinator may also telephone or text the participant to remind them to complete the  
1276 exit survey. We will document the number of participants invited to participate in the survey as  
1277 well as the number of participants who decline participation.

#### 1278 1279 9.5 Data Entry

1280 The exit survey responses will be entered into the Aqueous-PREP / PREPARE trial's electronic  
1281 data capture (EDC) system.

#### 1282 1283 9.6 Sample Size

1284 Sample size was calculated using a 5% margin of error, with 95% confidence intervals, a  
1285 potential population of all patients who have completed one year follow up (approximately 1600  
1286 patients) and an expected response rate of 50%. With this in mind, a sample size of  
1287 approximately 310 patients who complete every survey question will be required.<sup>51</sup> As such, the  
1288 survey will be distributed to all participants at participating clinical sites until our sample size of  
1289 at least 310 participants is achieved.

#### 1290 1291 9.7 Data Analysis

1292 We will summarize all variables with frequencies and percentages. The short form questions  
1293 will be coded appropriately based on themes.

#### 1294 1295 9.8 Anticipated Implications of Results

1296 This research serves as an important step towards understanding patients' perspectives as  
1297 participants in a clinical trial. Additionally, the research may influence how future clinical trials  
1298 are designed and conducted, with the overall goal of a greater focus on the patient experience  
1299 and increasing patient involvement in research. Lastly, the results of this sub-study could help

1300 the study team to develop aids (e.g., posters, pamphlets, etc.) to improve patients' understanding  
1301 of clinical research and overall experience with the PREP-IT trials.

1302 **10.0 REFERENCES**

- 1303
- 1304 1. Darouiche RO, Wall Jr. MJ, Itani KMF, et al. Chlorhexidine-Alcohol versus Povidone-
- 1305 Iodine for Surgical-Site Antisepsis. *N Engl J Med.* 2010;362(1):18-26.
- 1306 doi:10.1056/NEJMoa0810988
- 1307 2. Tuuli MG, Liu J, Stout MJ, et al. A Randomized Trial Comparing Skin Antiseptic Agents
- 1308 at Cesarean Delivery. *N Engl J Med.* 2016;374(7):647-655. doi:10.1056/NEJMoa1511048
- 1309 3. Swenson BR, Sawyer RG. Importance of Alcohol in Skin Preparation Protocols. *Infect*
- 1310 *Control Hosp Epidemiol.* 2010;31(09):977. doi:10.1086/655843
- 1311 4. Swenson BR, Hedrick TL, Metzger R, Bonatti H, Pruett TL, Sawyer RG. Effects of
- 1312 preoperative skin preparation on postoperative wound infection rates: a prospective study
- 1313 of 3 skin preparation protocols. *Infect Control Hosp Epidemiol.* 2009;30(10):964-971.
- 1314 doi:10.1086/605926
- 1315 5. Centers for Disease Control and Prevention (CDC). *Surgical Site Infection (SSI) Event.;*
- 1316 2017.
- 1317 6. Schoenfeld AJ, Dunn JC, Belmont PJ. Pelvic, spinal and extremity wounds among
- 1318 combat-specific personnel serving in Iraq and Afghanistan (2003-2011): A new paradigm
- 1319 in military musculoskeletal medicine. *Injury.* 2013;44(12):1866-1870.
- 1320 doi:10.1016/j.injury.2013.08.001
- 1321 7. FLOW Investigators. A Trial of Wound Irrigation in the Initial Management of Open
- 1322 Fracture Wounds. *N Engl J Med.* 2015;373(27):2629-2641. doi:10.1056/NEJMoa1508502
- 1323 8. Gustilo R, Merkow R, Templeman D. Management of open fractures. *J Bone Jt Surg.*
- 1324 1990;72(2):299-304.
- 1325 9. Mcdonnell G, Russell AD. Antiseptics and disinfectants: Activity, action, and resistance.
- 1326 *Clin Microbiol Rev.* 1999;12(1):147-179. doi:10.1007/s13398-014-0173-7.2
- 1327 10. Dumville J, McFarlane E, Edwards P, Lipp A, Holmes A, Liu Z. Preoperative skin
- 1328 antiseptic for prevention of surgical wound infections after clean surgery. *Cochrane*
- 1329 *Database Syst Rev.* 2013;(3):CD003949. doi:10.1002/14651858.CD003949.pub4
- 1330 11. Kunisada T, Yamada K, Oda S, Hara O. Investigation on the efficacy of povidone-iodine
- 1331 against antiseptic-resistant species. *Dermatology.* 1997;195 Suppl(suppl 2):14-18.
- 1332 <http://www.ncbi.nlm.nih.gov/pubmed/9403250>.
- 1333 12. Russell AD, Day MJ. Antibacterial activity of chlorhexidine. *J Hosp Infect.* 1993;25:229-
- 1334 238.
- 1335 13. Tsang STJ, Mills LA, Frantzias J, Baren JP, Keating JF, Simpson AHRW. Exchange
- 1336 nailing for nonunion of diaphyseal fractures of the tibia: our results and an analysis of the
- 1337 risk factors for failure. *Bone Joint J.* 2016;98-B(4):534-541. doi:10.1302/0301-
- 1338 620X.98B4.34870
- 1339 14. Mills L, Tsang J, Hooper G, Keenan G, Simpson A. The multifactorial aetiology of
- 1340 fracture nonunion and the importance of searching for latent infection. *Bone Joint Res.*
- 1341 2016;5(10):512-519. doi:10.1302/2046-3758.510.BJR-2016-0138
- 1342 15. Torbert JT, Joshi M, Moraff A, et al. Current Bacterial Speciation and Antibiotic
- 1343 Resistance in Deep Infections After Operative Fixation of Fractures. *J Orthop Trauma.*
- 1344 2015;29(1):7-17. doi:10.1097/BOT.000000000000158
- 1345 16. Gitajn IL, Sprague S, Petrisor B, Jeray KJ, O'Hara N, Nascone J, Bhandari M, Slobogean
- 1346 G, FLOW Investigators. Predictors of Complications in Severe Open Fractures. *J Orthop*
- 1347 *Trauma.*

- 1348 17. Müller M, Nazarian S, Koch P, Schatzker J. The Comprehensive Classification of  
1349 Fractures of Long Bones. *Springer-Verlag Berlin Heidelb.* 1990.  
1350 <http://www.springer.com/kr/book/9783540181651>.
- 1351 18. Järvinen TLN, Sihvonen R, Bhandari M, et al. Blinded interpretation of study results can  
1352 feasibly and effectively diminish interpretation bias. *J Clin Epidemiol.* 2014;67(7):769-  
1353 772. doi:10.1016/j.jclinepi.2013.11.011
- 1354 19. Centers for Disease Control and Prevention (CDC). *CDC/NHSN Surveillance Definitions*  
1355 *for Specific Types of Infections.*; 2017.
- 1356 20. Metsemakers WJ, Morgenstern M, McNally MA, et al. Fracture-related infection: A  
1357 consensus on definition from an international expert group. *Injury.* 2018.  
1358 doi:10.1016/j.injury.2017.08.040
- 1359 21. Metsemakers WJ, Kuehl R, Moriarty TF, et al. Infection after fracture fixation: Current  
1360 surgical and microbiological concepts. *Injury.* 2018. doi:10.1016/j.injury.2016.09.019
- 1361 22. Journal of Orthopaedic Trauma. Journal of Orthopaedic Trauma: Online submission and  
1362 review system. <http://edmgr.ovid.com/jot/accounts/ifauth.htm>. Published 2019. Accessed  
1363 April 10, 2019.
- 1364 23. Study to Prospectively Evaluate Reamed Intramedullary Nails in Patients with Tibial  
1365 Fractures Investigators, Bhandari M, Guyatt G, et al. Randomized trial of reamed and  
1366 unreamed intramedullary nailing of tibial shaft fractures. *J Bone Joint Surg Am.*  
1367 2008;90(12):2567-2578. doi:10.2106/JBJS.G.01694
- 1368 24. Gustilo R, Anderson J. Prevention of infection in the treatment of one thousand and  
1369 twenty-five open fractures of long bones: retrospective and prospective analyses. *J Bone*  
1370 *Joint Surg Am.* 1976;58(4):453-458.
- 1371 25. TRUST Investigators writing group, Busse JW, Bhandari M, et al. Re-evaluation of low  
1372 intensity pulsed ultrasound in treatment of tibial fractures (TRUST): randomized clinical  
1373 trial. *BMJ.* 2016;355:i5351. doi:10.1136/bmj.i5351
- 1374 26. FAITH Investigators. Fracture fixation in the operative management of hip fractures  
1375 (FAITH): an international, multicentre, randomised controlled trial. *Lancet.*  
1376 2017;389(10078):1519-1527. doi:10.1016/S0140-6736(17)30066-1
- 1377 27. Bhandari M, Devereaux PJ, Einhorn TA, et al. Hip fracture evaluation with alternatives of  
1378 total hip arthroplasty versus hemiarthroplasty (HEALTH): protocol for a multicentre  
1379 randomised trial. *BMJ Open.* 2015;5(2):e006263. doi:10.1136/bmjopen-2014-006263
- 1380 28. Reich NG, Myers JA, Obeng D, Milstone AM, Perl TM. Empirical power and sample size  
1381 calculations for cluster-randomized and cluster-randomized crossover studies. *PLoS One.*  
1382 2012;7(4):e35564. doi:10.1371/journal.pone.0035564
- 1383 29. Grantham KL, Kasza J, Heritier S, Hemming K, Litton E, Forbes AB. How many times  
1384 should a cluster randomized crossover trial cross over? *Stat Med.* 2019.  
1385 doi:10.1002/sim.8349
- 1386 30. Zwarenstein M, Treweek S, Gagnier JJ, et al. Improving the reporting of pragmatic trials:  
1387 an extension of the CONSORT statement. *BMJ.* 2008;337:a2390.  
1388 doi:10.1136/BMJ.A2390
- 1389 31. Campbell MK, Piaggio G, Elbourne DR, Altman DG. Consort 2010 statement: extension  
1390 to cluster randomised trials. *BMJ.* 2012;345(sep04 1):e5661-e5661.  
1391 doi:10.1136/bmj.e5661
- 1392 32. Thabane L, Akhtar-Danesh N. Guidelines for reporting descriptive statistics in health  
1393 research. *Nurse Res.* 2008;15(2):72-81. doi:10.7748/nr2008.01.15.2.72.c6331

- 1394 33. Sterne J, White I, Carlin J, et al. Multiple imputation for missing data in epidemiological  
1395 and clinical research: potential and pitfalls. *Br Med J*. 2009;338(July):b2393.  
1396 doi:10.1136/bmj.b2393
- 1397 34. Little RJA, Rubin DB. *Statistical Analysis with Missing Data.*; 2002.  
1398 doi:10.2307/1533221
- 1399 35. Wang R, Lagakos SW, Ware JH, Hunter DJ, Drazen JM. Statistics in Medicine —  
1400 Reporting of Subgroup Analyses in Clinical Trials. *N Engl J Med*. 2007;357(21):2189-  
1401 2194. doi:10.1056/NEJMsr077003
- 1402 36. Sun X, Ioannidis JPA, Agoritsas T, Alba AC, Guyatt G. How to use a subgroup analysis:  
1403 users' guide to the medical literature. *JAMA*. 2014;311(4):405-411.  
1404 doi:10.1001/jama.2013.285063
- 1405 37. Sun X, Briel M, Walter SD, Guyatt GH. Is a subgroup effect believable? Updating criteria  
1406 to evaluate the credibility of subgroup analyses. *BMJ*. 2010;340(9209):c117.  
1407 doi:10.1136/bmj.c117
- 1408 38. Sun X, Briel M, Busse JW, et al. Subgroup Analysis of Trials Is Rarely Easy (SATIRE): a  
1409 study protocol for a systematic review to characterize the analysis, reporting, and claim of  
1410 subgroup effects in randomized trials. *Trials*. 2009;10:101. doi:10.1186/1745-6215-10-  
1411 101
- 1412 39. Morgan KE, Forbes AB, Keogh RH, Jairath V, Kahan BC. Choosing appropriate analysis  
1413 methods for cluster randomised cross-over trials with a binary outcome. *Stat Med*.  
1414 2017;36(2):318-333. doi:10.1002/sim.7137
- 1415 40. Zhang Y, Alyass A, Vanniyasingam T, et al. A systematic survey of the methods literature  
1416 on the reporting quality and optimal methods of handling participants with missing  
1417 outcome data for continuous outcomes in randomized controlled trials. *J Clin Epidemiol*.  
1418 2017;88:67-80. doi:10.1016/j.jclinepi.2017.05.016
- 1419 41. Pocock SJ, Clayton TC, Stone GW. Challenging Issues in Clinical Trial Design Part 4 of a  
1420 4-Part Series on Statistics for Clinical Trials. *J Am Coll Cardiol*. 2015;66(25):2886-2898.  
1421 doi:10.1016/j.jacc.2015.10.051
- 1422 42. Chalmers I. What do I want from health research and researchers when I am a patient?  
1423 *BMJ*. 1995;310(6990):1315-1318. doi:10.1136/bmj.310.6990.1315
- 1424 43. Domecq JP, Prutsky G, Elraiyah T, et al. Patient engagement in research: A systematic  
1425 review. *BMC Health Serv Res*. 2014;14:89. doi:10.1186/1472-6963-14-89
- 1426 44. INVOLVE. *Briefing Notes for Researchers: Public Involvement in NHS, Public Health  
1427 and Social Care Research.*; 2012. [https://www.invo.org.uk/wp-](https://www.invo.org.uk/wp-content/uploads/2014/11/9938_INVOLVE_Briefing_Notes_WEB.pdf)  
1428 [content/uploads/2014/11/9938\\_INVOLVE\\_Briefing\\_Notes\\_WEB.pdf](https://www.invo.org.uk/wp-content/uploads/2014/11/9938_INVOLVE_Briefing_Notes_WEB.pdf).
- 1429 45. Esmail L, Moore E, Rein A. Evaluating patient and stakeholder engagement in research:  
1430 Moving from theory to practice. *J Comp Eff Res*. 2015;4(2):133-145.  
1431 doi:10.2217/cer.14.79
- 1432 46. Tarpey M, INVOLVE Support Unit. *Why People Get Involved in Health and Social Care  
1433 Research: A Working Paper*. Vol July.; 2006. [http://www.invo.org.uk/wp-](http://www.invo.org.uk/wp-content/uploads/documents/whypeoplegetinvolvedinresearch2006.pdf)  
1434 [content/uploads/documents/whypeoplegetinvolvedinresearch2006.pdf](http://www.invo.org.uk/wp-content/uploads/documents/whypeoplegetinvolvedinresearch2006.pdf).
- 1435 47. Brett J, Staniszewska S, Mockford C, et al. A Systematic Review of the Impact of Patient  
1436 and Public Involvement on Service Users, Researchers and Communities. *Patient*.  
1437 2014;7(4):387-395. doi:10.1007/s40271-014-0065-0
- 1438 48. Robinson A. Patient and public involvement: In theory and in practice. *J Laryngol Otol*.  
1439 2014;128(4):318-325. doi:10.1017/S0022215114000735



- 1440 49. Lawton R, O'Hara JK, Sheard L, et al. Can patient involvement improve patient safety? A  
1441 cluster randomised control trial of the Patient Reporting and Action for a Safe  
1442 Environment (PRASE) intervention. *BMJ Qual Saf.* 2017;26(8):622-631.  
1443 doi:10.1136/bmjqs-2016-005570
- 1444 50. Fergusson D, Monfaredi Z, Pussegoda K, et al. The prevalence of patient engagement in  
1445 published trials: A systematic review. *Res Involv Engagem.* 2018;4:17.  
1446 doi:10.1186/s40900-018-0099-x
- 1447 51. Bartlett JE, Kotrlik JWKJW, Higgins C. Organizational research: Determining appropriate  
1448 sample size in survey research appropriate sample size in survey research. *Inf Technol*  
1449 *Learn Perform J.* 2001;19(1):43-50.  
1450  
1451  
1452
