# Supplementary material for: Effectiveness of Iodophor vs Chlorhexidine Solutions for Surgical Site Infections and Unplanned Reoperations for Patients Who Underwent Fracture Repair: The PREP-IT Master Protocol
Source: PubMed Central journal article supplement (PMC7139274; doi:10.1001/jamanetworkopen.2020.2215), 2020-04-07
Supplement: jamanetwopen-3-e202215-s002.pdf [file jamanetwopen-3-e202215-s002.pdf]

1  
2  
3  
4  
5  
6  
7  
8  
9  
10  
11  
12  
13  
14  
15  
16  
17  
18  
19  
20  
21  
22  
23  
24  
25  
26  
27  
28

**PREP-IT**  
**A Program of Randomized trials to Evaluate Pre-operative antiseptic skin solutions In orthopaedic Trauma**

**PREPARE: A Pragmatic Randomized trial Evaluating Pre-operative Alcohol skin solutions in FRactured Extremities**

**PREPARE PROTOCOL**

**Version: 2.1**

**Date: 04-Nov-2019**

This study is funded by the Patient-Centered Outcomes Research Institute (PCORI) (PCS-1609-36512).

The PREPARE trial is part of the PREP-IT research program. The protocol is the confidential intellectual property of the Principal Investigators and PREP-IT Steering Committee, and the protocol cannot be used in any form without the expressed written permission of the Principal Investigators.

|                                                          |                                                                                                                  |                                 |
|----------------------------------------------------------|------------------------------------------------------------------------------------------------------------------|---------------------------------|
| <b><i>Reviewed and Approved by:</i></b>                  |                                                                                                                  |                                 |
| <i>Dr. Gerard Slobogean<br/>(Principal Investigator)</i> | <b><i>Signature:</i></b><br>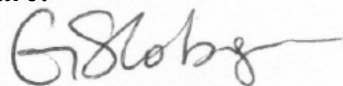 | <b><i>Date:</i></b> 04-Nov-2019 |
| <i>Dr. Sheila Sprague<br/>(Principal Investigator)</i>   | <b><i>Signature:</i></b><br>  | <b><i>Date:</i></b> 04-Nov-2019 |
| <i>Dr. Mohit Bhandari<br/>(Principal Investigator)</i>   | <b><i>Signature:</i></b><br> | <b><i>Date:</i></b> 04-Nov-2019 |

29  
30  
31  
32

|    |                                                                                   |           |
|----|-----------------------------------------------------------------------------------|-----------|
| 33 | <b>TABLE OF CONTENTS</b>                                                          |           |
| 34 | <b>LIST OF ABBREVIATIONS .....</b>                                                | <b>4</b>  |
| 35 | <b>STUDY SUMMARY.....</b>                                                         | <b>5</b>  |
| 36 | <b>1.0 INTRODUCTION.....</b>                                                      | <b>8</b>  |
| 37 | 1.1 Extremity Fractures and Surgical Site Infections .....                        | 8         |
| 38 | 1.2 Prevention of Infection .....                                                 | 8         |
| 39 | 1.3 Rationale for Pre-Operative Antiseptic Skin Solution Prophylaxis.....         | 8         |
| 40 | 1.4 Extrapolating Evidence from Other Surgical Disciplines to Fracture Surgery is |           |
| 41 | Problematic .....                                                                 | 10        |
| 42 | 1.5 Why Iodophor Skin Preparations May Reduce Operative Extremity Fracture SSI    | 11        |
| 43 | 1.6 Why Iodophor Skin Preparations May Reduce Extremity Fracture Reoperations .   | 11        |
| 44 | 1.7 Lack of Surgeon Consensus.....                                                | 12        |
| 45 | <b>2.0 STUDY OBJECTIVES AND HYPOTHESES.....</b>                                   | <b>12</b> |
| 46 | 2.1 Study Objectives and Hypotheses.....                                          | 12        |
| 47 | 2.2 Open and Closed Fracture Study Populations .....                              | 13        |
| 48 | 2.3 Subgroup Objectives.....                                                      | 13        |
| 49 | 2.3.1 Open Fracture Subgroups .....                                               | 13        |
| 50 | 2.3.2 Closed Fracture Subgroups.....                                              | 13        |
| 51 | 2.3.3 Subgroup Hypotheses .....                                                   | 13        |
| 52 | <b>3.0 TRIAL DESIGN.....</b>                                                      | <b>14</b> |
| 53 | 3.1 Summary .....                                                                 | 14        |
| 54 | 3.2 Pragmatic-Explanatory Continuum .....                                         | 15        |
| 55 | <b>4.0 METHODS .....</b>                                                          | <b>16</b> |
| 56 | 4.1 Study Setting, Cluster Eligibility, and Selection of Clusters .....           | 16        |
| 57 | 4.2 Eligibility Criteria .....                                                    | 17        |
| 58 | 4.2.1 Open Fracture Population Eligibility Criteria.....                          | 17        |
| 59 | 4.2.2 Closed Fracture Population Eligibility Criteria .....                       | 18        |
| 60 | 4.2.3 Additional Eligibility Considerations .....                                 | 18        |
| 61 | 4.3 Recruitment Strategy .....                                                    | 19        |
| 62 | 4.3.1 Patient Screening & Consent .....                                           | 19        |
| 63 | 4.4 Managing Patient Volume .....                                                 | 20        |
| 64 | 4.4.1 Enrollment of Patients from Only One Fracture Cohort.....                   | 20        |
| 65 | 4.4.2 Enrollment Sampling Plan .....                                              | 21        |
| 66 | 4.4 Randomization Methods .....                                                   | 21        |
| 67 | 4.5 Blinding.....                                                                 | 21        |
| 68 | 4.6 Description of the Interventions.....                                         | 22        |
| 69 | 4.6.1 Initial Run-In Phase .....                                                  | 22        |
| 70 | 4.6.2 First Intervention Phase .....                                              | 22        |
| 71 | 4.6.3 Second Intervention Phase.....                                              | 23        |
| 72 | 4.6.4 Special Considerations for Ongoing Treatment Crossovers .....               | 23        |
| 73 | 4.6.5 Evaluation of Site Performance and Removal of Clinical Sites .....          | 23        |
| 74 | 4.6.6 Application of Pre-Operative Antiseptic Skin Solutions .....                | 23        |
| 75 | 4.6.7 Patients with Multiple Planned Surgeries .....                              | 24        |
| 76 | 4.6.8 Iodophor Antiseptic Solution.....                                           | 24        |

|     |                                                                              |           |
|-----|------------------------------------------------------------------------------|-----------|
| 77  | 4.6.9 CHG Antiseptic Solution .....                                          | 24        |
| 78  | 4.7 Perioperative Co-Interventions .....                                     | 25        |
| 79  | 4.8 Outcome Measures.....                                                    | 25        |
| 80  | 4.8.1 Primary Outcome .....                                                  | 25        |
| 81  | 4.8.2 Secondary Outcome .....                                                | 27        |
| 82  | 4.8.4 Data Collection and Participant Follow-up.....                         | 28        |
| 83  | <b>5.0 STATISTICAL PLAN.....</b>                                             | <b>30</b> |
| 84  | 5.1 Sample Size Determination.....                                           | 30        |
| 85  | 5.2 Statistical Methods.....                                                 | 31        |
| 86  | 5.2.1 Analysis Plan Overview.....                                            | 31        |
| 87  | 5.2.2 Analysis of the Study Outcomes.....                                    | 32        |
| 88  | 5.2.3 Subgroup Analyses .....                                                | 32        |
| 89  | 5.2.4 Sensitivity Analyses.....                                              | 33        |
| 90  | 5.2.5 Interim Analysis.....                                                  | 36        |
| 91  | <b>6.0 DATA MANAGEMENT .....</b>                                             | <b>36</b> |
| 92  | 6.1 Case Report Forms and Data Transmission.....                             | 36        |
| 93  | 6.2 Data Integrity .....                                                     | 36        |
| 94  | <b>7.0 ETHICS AND DISSEMINATION.....</b>                                     | <b>36</b> |
| 95  | 7.1 Research Ethics Approval.....                                            | 36        |
| 96  | 7.2 Consent .....                                                            | 36        |
| 97  | 7.3 Confidentiality .....                                                    | 38        |
| 98  | 7.4 Protocol Amendments.....                                                 | 38        |
| 99  | 7.5 Adverse Event Reporting and Definitions .....                            | 39        |
| 100 | 7.5.1 Serious Adverse Event (SAE).....                                       | 39        |
| 101 | 7.5.2 Unanticipated Problems Resulting in Risk to Participant or Others..... | 39        |
| 102 | 7.5.3 Serious Unexpected Adverse Drug Reactions .....                        | 39        |
| 103 | 7.5.4 Adverse Event Reporting.....                                           | 39        |
| 104 | 7.5.5 Clinical Site Reporting – IRB and REB .....                            | 40        |
| 105 | 7.5.6 Data and Safety Monitoring Committee .....                             | 40        |
| 106 | 7.6 Dissemination Policy .....                                               | 40        |
| 107 | <b>8.0 SUB-STUDY: PATIENT EXPERIENCES IN THE AQUEOUS-PREP AND</b>            |           |
| 108 | <b>PREPARE TRIALS.....</b>                                                   | <b>40</b> |
| 109 | 8.1 Introduction.....                                                        | 40        |
| 110 | 8.2 Rationale and Objectives .....                                           | 41        |
| 111 | 8.3 Sub-Study Design .....                                                   | 41        |
| 112 | 8.4 Survey Participants and Distribution .....                               | 42        |
| 113 | 8.5 Data Entry .....                                                         | 42        |
| 114 | 8.6 Sample Size.....                                                         | 42        |
| 115 | 8.7 Data Analysis .....                                                      | 42        |
| 116 | 8.8 Anticipated Implications of Results.....                                 | 42        |
| 117 | <b>9.0 REFERENCES .....</b>                                                  | <b>43</b> |
| 118 |                                                                              |           |
| 119 |                                                                              |           |
| 120 |                                                                              |           |

**LIST OF ABBREVIATIONS**

| <b>Abbreviation</b> | <b>Explanation</b>                                                                                    |
|---------------------|-------------------------------------------------------------------------------------------------------|
| CDC                 | Centers for Disease Control and Prevention                                                            |
| CEO                 | Center for Evidence-Based Orthopaedics                                                                |
| CHG                 | Chlorhexidine gluconate                                                                               |
| CI                  | Confidence interval                                                                                   |
| CRF                 | Case report form                                                                                      |
| EDC                 | Electronic data capture                                                                               |
| FDA                 | Food and Drug Administration                                                                          |
| FLOW                | Fluid Lavage of Open Wounds trial                                                                     |
| FRI                 | Fracture-Related Infection                                                                            |
| ITT                 | Intention-to-treat                                                                                    |
| IRB                 | Institutional Review Board                                                                            |
| PREPARE             | A Pragmatic Randomized trial Evaluating Pre-operative Alcohol skin solutions in FRactured Extremities |
| REB                 | Research Ethics Board                                                                                 |
| SAE                 | Serious adverse event                                                                                 |
| SSI                 | Surgical site infection                                                                               |

|                                              |                                                                                                                                                                                                                                                                                                                                                                                                                                                                                                                                                                                                                                                                                  |
|----------------------------------------------|----------------------------------------------------------------------------------------------------------------------------------------------------------------------------------------------------------------------------------------------------------------------------------------------------------------------------------------------------------------------------------------------------------------------------------------------------------------------------------------------------------------------------------------------------------------------------------------------------------------------------------------------------------------------------------|
| <b>Methodology</b>                           | Cluster randomized crossover design.                                                                                                                                                                                                                                                                                                                                                                                                                                                                                                                                                                                                                                             |
| <b>Coordinating Center</b>                   | This study will be centrally coordinated by the Methods Center at the Center for Evidence-Based Orthopaedics (CEO), McMaster University, Hamilton, Ontario and by the Administrative Center within the Department of Orthopaedics at the University of Maryland, R Adams Cowley Shock Trauma Center, Baltimore, Maryland.                                                                                                                                                                                                                                                                                                                                                        |
| <b>Clinical Sites</b>                        | At least 18 clinical sites in North America. Additional clinical sites will be included or removed as needed.                                                                                                                                                                                                                                                                                                                                                                                                                                                                                                                                                                    |
| <b>Background</b>                            | The prevention of infection is an important goal influencing peri-operative care of extremity fracture patients. Standard practice in the operative management of extremity fractures includes sterile technique and pre-operative skin preparation with an antiseptic solution. The available solutions kill bacteria and decrease the quantity of native skin flora, thereby decreasing surgical site infection (SSI). While there is extensive guidance on specific procedures for prophylactic antibiotic use and standards for sterile technique, the evidence regarding the choice of antiseptic skin preparation solution is very limited for extremity fracture surgery. |
| <b>Objectives</b>                            | The overarching objective of this trial is to compare the effectiveness of iodine povacrylex (0.7% free iodine) in 74% isopropyl alcohol versus 2% chlorhexidine gluconate (CHG) in 70% isopropyl alcohol for the management of extremity fractures that require surgical treatment. The primary outcome for comparison is <i>surgical site infection (SSI)</i> , and the secondary outcome is <i>unplanned fracture-related reoperation</i> .                                                                                                                                                                                                                                   |
| <b>Open and Closed Fractures Populations</b> | Open fracture patients and closed fracture patients represent two distinct populations within extremity fracture surgery. Open and closed fracture participants will be recruited separately to independently compare the effectiveness of the study solutions in each population. Therefore, our effectiveness comparisons will be performed separately within the open fracture and closed fracture populations.                                                                                                                                                                                                                                                               |
| <b>Subgroup Objectives</b>                   | The PREPARE trial will also explore the possibility of differential treatment effects of the pre-operative antiseptic skin solutions among clinically important subgroups. The open fracture subgroups will be defined by i) the severity of open fracture (Gustilo-Anderson type I or II versus III); <sup>1</sup> ii) upper extremity versus lower extremity open fractures; iii) severity of wound contamination; and, iv) presence or absence of comorbidities that affect wound healing. The closed fracture subgroups will be defined by: i) severity of soft                                                                                                              |

|                                              |                                                                                                                                                                                                                                                                                                                                                                                                                                                                                                                                                                                                                                                                                                                                                                                                    |
|----------------------------------------------|----------------------------------------------------------------------------------------------------------------------------------------------------------------------------------------------------------------------------------------------------------------------------------------------------------------------------------------------------------------------------------------------------------------------------------------------------------------------------------------------------------------------------------------------------------------------------------------------------------------------------------------------------------------------------------------------------------------------------------------------------------------------------------------------------|
|                                              | tissue injury (higher Tscherne injuries) and ii) presence or absence of comorbidities that affect wound healing.                                                                                                                                                                                                                                                                                                                                                                                                                                                                                                                                                                                                                                                                                   |
| <b>Diagnosis and Main Inclusion Criteria</b> | All patients 18 years of age or older who present to a recruiting hospital for treatment of an open fracture(s) of the appendicular skeleton will be screened for participation within 3 weeks of their fracture. All patients 18 years of age or older who present to a recruiting hospital for surgical treatment of a closed lower extremity or pelvic fracture(s) will be screened for participation within 6 weeks of their fracture. Eligible patients must have an open fracture of the appendicular skeleton or have a closed lower extremity or pelvic fracture, and their fractures must be definitively managed with a surgical implant (e.g., internal fixation, external fixation (open fractures and in closed fractures that require a surgical incision), joint prosthesis, etc.). |
| <b>Treatment Groups</b>                      | The PREPARE trial will compare the most common alcohol-based pre-operative antiseptic skin solutions used during extremity fracture surgery. The iodine-based treatment intervention is an antiseptic solution comprised of iodine povacrylex (0.7% free iodine) in 74% isopropyl alcohol. 3M™ DuraPrep™ [3M Health Care, St Paul, MN], will be the commercial product used. The CHG intervention is an antiseptic solution comprised of 2% CHG in 70% isopropyl alcohol. ChloroPrep® [CareFusion Inc., Leawood, KS, USA] will be the commercial product used.                                                                                                                                                                                                                                     |
| <b>Randomization</b>                         | Treatment allocation will be determined using a cluster-randomized crossover trial design. The open and closed fracture populations will be treated with the same allocated solution at all times during the trial. The order of treatment allocation for each orthopaedic practice will be randomly assigned using a computer-generated randomization table. Each site will start with the initially allocated study solution and eventually crossover to the other solution for their second recruitment period. This process of alternating treatments will repeat approximately every 2 months as dictated by the initial randomization.                                                                                                                                                       |
| <b>Study Outcomes</b>                        | The primary outcome is SSI, guided by the Centers for Disease Control and Prevention's (CDC) National Healthcare Safety Network reporting criteria, which includes superficial incisional SSI within 30 days and deep incisional or organ/space SSI within 90 days of definitive fracture management surgery. The secondary outcome is the occurrence of an unplanned fracture-related reoperation within 12 months of the fracture. Alternative definitions of SSI, including the confirmatory criteria for Fracture-Related Infection (FRI) and the CDC criteria within 1 year of injury will be used for sensitivity analyses of the primary comparison. All study outcomes will be adjudicated by a blinded committee using clinical notes and radiographs.                                    |

|                     |                                                                                                                                                                                                                                                                                                                                                                                                                                                                                                                                       |
|---------------------|---------------------------------------------------------------------------------------------------------------------------------------------------------------------------------------------------------------------------------------------------------------------------------------------------------------------------------------------------------------------------------------------------------------------------------------------------------------------------------------------------------------------------------------|
| <b>Follow-Up</b>    | Study participants will be followed at 6 weeks, 3 months, 6 months, 9 months, and 12 months from their fracture.                                                                                                                                                                                                                                                                                                                                                                                                                      |
| <b>Sample Size</b>  | A minimum of 1,540 participants with open fractures and a minimum of 6,280 participants with closed lower extremity or pelvic fractures will be included in PREPARE.                                                                                                                                                                                                                                                                                                                                                                  |
| <b>Significance</b> | SSIs are often devastating complications for fracture patients because of the resultant reoperations, adverse events from antibiotic courses, and fracture healing difficulties. Given the substantial impact of extremity fractures, maximizing the effectiveness of current prophylactic procedures is essential. The PREPARE trial will provide necessary evidence to guide the prevention of SSIs in fracture care, and the trial is poised to have a significant impact on the care and outcomes of extremity fracture patients. |

124  
125

## 126 1.0 INTRODUCTION

127

### 128 1.1 Extremity Fractures and Surgical Site Infections

129 More than one million Americans suffer an extremity fracture (broken bone in the arm, leg, or  
130 pelvis) that requires surgery each year.<sup>2,3</sup> Approximately 5% (or 50,000) of surgical fracture  
131 patients develop a surgical site infection (SSI),<sup>4,5</sup> which is twice the rate among most surgical  
132 patients and nearly five times the rate among patients undergoing elective orthopaedic surgeries  
133 (e.g., joint replacement).<sup>6</sup> Patients who develop a SSI after their fracture fixation surgery  
134 experience a long and difficult treatment pathway. Researchers have identified that when a  
135 fracture patient experiences a SSI, they typically undergo at least two additional surgeries to  
136 control the infection, spend a median of 14 additional days in the hospital, and have significantly  
137 lower health related quality of life (HRQL).<sup>7</sup> Similarly, results from the recently completed Fluid  
138 Lavage of Open Wounds (FLOW) trial confirmed that patients who had a SSI, or another  
139 complication, that required an additional surgery reported significantly lower physical and  
140 mental HRQL in the 12 months following their fracture compared to patients who did not  
141 experience a SSI.<sup>8</sup> In the most severe cases, when a SSI cannot be controlled, a limb amputation  
142 becomes necessary.

143

144 Open fractures, closed lower extremity fractures, and pelvic fractures represent some of the most  
145 severe musculoskeletal injuries.<sup>9</sup> Due to their high-energy mechanisms, these fractures are often  
146 accompanied by soft-tissue injuries that contribute to unacceptably poor outcomes. The FLOW  
147 trial of 2,447 open fracture patients reported a 13.2% incidence of open fracture-related  
148 reoperations;<sup>4</sup> Closed fractures of the lower extremity are also at high risk of complications,  
149 particularly when compared to closed upper extremity fractures. For example, the rate of SSI in  
150 closed tibial plateau and plafond fractures range from 5.6 – 11.9%,<sup>10-14</sup> although some cohort  
151 studies have reported infection rates as high as 25.0%.<sup>15</sup> This is contrast with SSI rates of <5%  
152 for common upper extremity fractures like humeral shaft, forearm, or distal radius fractures.<sup>16,17</sup>  
153 This is further illustrated in a series of 214 deep orthopaedic fracture infections, in which 58%  
154 occurred in the tibia and ankle, and only 10% occurred anywhere in the upper extremity.<sup>18</sup>  
155 Finally, pelvic fractures are associated with some of the most challenging SSIs to treat among  
156 closed fractures because of their propensity to gram negative organisms and limitations in  
157 reconstruction options post-infection. Ultimately, infectious complications in these fracture  
158 populations lead to prolonged morbidity, loss of function, and potential limb loss.<sup>1</sup>

159

### 160 1.2 Prevention of Infection

161 The prevention of infection is the single most important goal influencing peri-operative care of  
162 patients with fractures that require surgical management. Standard practice in the management of  
163 extremity fractures includes sterile technique and pre-operative skin cleaning with an antiseptic  
164 solution. The available solutions kill bacteria and decrease the quantity of native skin flora,  
165 thereby decreasing SSI.<sup>19-22</sup> While there is extensive guidance on specific procedures for  
166 prophylactic antibiotic use and standards for sterile technique, the evidence regarding the choice  
167 of antiseptic skin preparation solution is very limited for extremity fracture surgery.

168

### 169 1.3 Rationale for Pre-Operative Antiseptic Skin Solution Prophylaxis

170 The most common skin preparation solutions include either an iodophor or chlorhexidine-based  
171 active ingredient and are delivered in an alcohol or aqueous-based solution. Iodophors achieve  
172 effective antisepsis by penetrating the cell wall of microorganisms and disrupting critical protein  
173 and nucleic acid structures.<sup>23</sup> Iodophors are effective against most bacteria, but also may have



174 broader-spectrum coverage of mycobacteria, viruses, and some spores compared to  
175 chlorhexidine gluconate (CHG).<sup>23</sup> CHG similarly achieves antimicrobial effects by penetrating  
176 the cell wall of microorganisms. This antimicrobial action allows CHG to be effective against  
177 most bacteria.<sup>23</sup>

178  
179 The evidence guiding pre-operative antiseptic skin solution choice in fracture surgery is largely  
180 extrapolated from other surgical disciplines. In a randomized controlled trial involving 849  
181 patients undergoing clean-contaminated abdominal, gynecologic, or urologic surgery, the use of  
182 2% CHG in 70% isopropyl alcohol was compared to aqueous 10% povidone-iodine. The overall  
183 rate of 30-day SSI was significantly lower in the CHG in alcohol group compared to the  
184 povidone-iodine group (9.5% vs. 16.1%; P=0.004; relative risk, 0.59; 95% confidence interval  
185 (CI): 0.41–0.85). While this study demonstrated superior efficacy of CHG in alcohol compared  
186 to povidone-iodine, comparing an alcohol based solution to an aqueous solution creates  
187 uncertainty about whether the result observed occurred from the superiority of CHG over iodine,  
188 isopropyl alcohol over water, or a synergistic combination of CHG in alcohol.<sup>19</sup> In an effort to  
189 overcome the controversies associated with comparing CHG and iodine in different solutions, a  
190 more recent randomized controlled trial of 1,147 caesarean section patients allocated patients to  
191 2% CHG in 70% isopropyl alcohol versus 8.3% povidone-iodine in 72.5% isopropyl alcohol.  
192 Similar to the previous randomized controlled trial, CHG proved more efficacious for reducing  
193 30-day SSI (4.0% in the CHG in alcohol group and 7.3% in the iodine in alcohol group; relative  
194 risk, 0.55; 95% CI: 0.34–0.90; P=0.02).<sup>20</sup>

195  
196 While the evidence from the above two randomized controlled trials demonstrates decreased SSI  
197 from CHG solutions in clean-contaminated abdominal and genito-urinary surgery, a larger non-  
198 randomized trial reported opposite effectiveness results. Swenson *et al.*, completed a larger 3,209  
199 patient pragmatic sequential implementation study, in which the use of the preoperative skin  
200 antiseptic solution was changed after six-month periods.<sup>21</sup> In this study, there were three  
201 treatment periods, each with approximately 1,000 general surgery patients undergoing elective  
202 and emergent cases. In the first period, patients received 7.5% povidone-iodine scrub, 70%  
203 isopropyl alcohol scrub, and 10% povidone-iodine skin paint. The second group received 2%  
204 CHG in 70% isopropyl alcohol (CHG group), and the third group received 0.7% iodine  
205 povacrylex in 74% isopropyl alcohol. Adjusted comparisons were performed using the intention-  
206 to-treat (ITT) principle and an as-treated analysis. Lower SSI rates were seen in the povidone-  
207 iodine skin paint group (4.8%) and the iodine povacrylex in isopropyl alcohol group (4.8%),  
208 compared with the SSI rates in the 2% CHG in 70% isopropyl alcohol group (8.2%) (P< 0.05;  
209 povidone-iodine skin paint odds ratio: 0.56, 95% CI: 0.40–0.79).<sup>21</sup> While the results of the  
210 Swenson study contradict those of the smaller randomized controlled trials, this large pragmatic  
211 study further highlights that the choice of antiseptic skin solution affects SSIs, and data to select  
212 the best solution remain conflicting.

213  
214 Considering the conflicting data, the most recent Cochrane systematic review comparing the  
215 efficacy of pre-operative antiseptic skin solutions for clean surgery concluded, “investment in at  
216 least one large trial (in terms of participants) is warranted to add definitive and hopefully  
217 conclusive data to the current evidence base. Ideally any future trial would evaluate the iodine-  
218 containing and CHG-containing solutions relevant to current practice...”<sup>24</sup> The Cochrane  
219 recommendation is a direct response to the limitations of the current available literature  
220 comparing antiseptic skin solutions. For orthopaedic fracture surgery, the impact of the treatment

221 uncertainty is further magnified when considering the higher rates of SSIs among open fracture  
222 patients and patients with closed lower extremity and pelvic fractures.

223

#### 224 **1.4 Extrapolating Evidence from Other Surgical Disciplines to Fracture Surgery is** 225 **Problematic**

226 With regards to orthopaedic patients, the inconsistent results leave the optimal antiseptic solution  
227 in doubt; in addition, results may differ across surgical settings. The risk of SSI is substantially  
228 greater in certain fracture populations (open fractures, closed lower extremity fractures, and  
229 pelvic fractures) due to the soft tissue trauma, wound contamination in open fractures, the  
230 increased risk of local vascular disruption, and the required surgery to fix the broken bones.  
231 Furthermore, the emergent nature of fracture surgery means that patients are unable to undergo  
232 other prophylactic skin care, such as CHG bathing, which is rendered to elective cases to reduce  
233 SSI. Additionally, the timing of prophylactic antibiotics may also fall beyond the recommended  
234 windows due to delays in getting to hospital; therefore, local antisepsis may become even more  
235 critical.

236

237 Most important, the soft tissue injury associated with a fracture is a critical difference from  
238 elective abdominal or gynecologic surgery. Other differences include wound contamination in  
239 open fractures, the use of a tourniquet that decreases the blood flow to the limb (potentially  
240 increasing the risk of infection), and the additional risk of implanting metal fixation that can  
241 harbor bacteria. Swenson *et al.*, directly acknowledged that the studies performed in general  
242 surgery patients may not apply to other specialties, particularly orthopaedic surgery.<sup>21</sup> Even if  
243 one wanted to directly apply the conflicting results outlined above to the care of fractures, there  
244 are critical limitations in the sparse general surgery and obstetrical literature available.

245

246 The most significant limitation in the existing literature is the use of a 30-day endpoint for SSI in  
247 all three studies described above.<sup>19-21</sup> While this may be acceptable for identifying most SSIs  
248 that involve only the skin (superficial SSI), infections that occur deep to the muscle and around  
249 the bone (deep SSI and organ/space SSI) often present beyond 30-days post-injury and have  
250 significantly more morbidity and mortality than superficial SSIs. This is a major limitation to the  
251 external validity of the previous studies' ability to guide fracture fixation practice. In the FLOW  
252 open fracture trial, nearly half the infection-related complications were identified between 30 and  
253 90 days from injury.<sup>4</sup> Similarly, a large case series of patients who developed deep infections  
254 following fracture fixation found that post-operative infections occurred at an average of 77 days  
255 after surgery (range, 3 days to 51 weeks).<sup>18</sup> While infections occurred earlier in patients with  
256 closed fractures, a substantial proportion occurred beyond 90 days (**Figure 1**).<sup>18</sup> Not only does  
257 the existing literature not extend follow-up during this period, it is plausible that the treatment  
258 effects of the antiseptic solutions behave differently for preventing deep or organ/space  
259 infections that often present between 30 and 90 days post-surgery. The need for longer follow-up  
260 is supported by a mandatory 90-day surveillance period for deep and organ/space SSIs according  
261 to the Centers for Disease Control and Prevention (CDC).<sup>25</sup> Therefore, the lack of directly  
262 applicable evidence, an overall paucity of good clinical evidence, and the inadequate duration of  
263 outcome follow-up mandate the need for a large, rigorous clinical trial in surgical preparation  
264 solutions in fracture care.

265

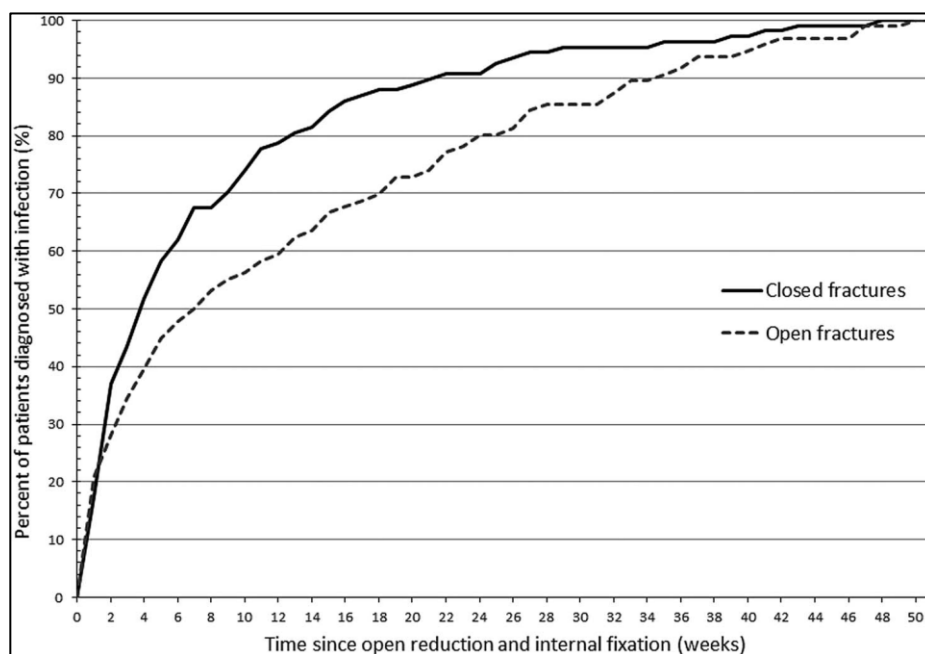

Figure 1: Time from Fracture Management Surgery Until SSI in Open and Closed Fractures

### 1.5 Why Iodophor Skin Preparations May Reduce Operative Extremity Fracture SSI

The only surgical skin preparation effectiveness data available for extremity fracture surgery come from the FLOW trial.<sup>4</sup> Secondary multivariable analyses of 2,447 patients with open fractures found that when compared to CHG solutions, iodophor-based skin antiseptic preparation solutions could be protective against complications (Adjusted Hazard Ratio 0.88, 95% CI: 0.69–1.12).<sup>4</sup> However, the wide CI suggests iodophor solutions may reduce the odds of infection by as much as 31% or increase it by as much as 12%, leaving its superiority as a fracture care skin preparation solution unresolved.<sup>4</sup>

There are several chemical properties to suggest iodine povacrylex may be more effective than CHG at preventing extremity fracture SSI.<sup>23</sup> Firstly, iodine has a potentially broader spectrum of antimicrobial activity.<sup>23</sup> Secondly, many open fracture patients require repeat surgical debridement, and therefore, these patients will receive multiple exposures to the pre-operative antiseptic solution. Extended use of iodophors has not been associated with the selection of resistant bacterial strains, whereas bacterial resistance to CHG has been documented.<sup>23,26,27</sup> While the methods for detecting CHG resistance are challenging and its clinical significance remains uncertain, these early observations heighten interest in establishing the comparative effectiveness of iodophors versus CHG. Finally, iodine povacrylex dries to form a water-insoluble polymer-based film that increases its resistance to being washed away by saline and bodily fluids.<sup>21</sup> This increased tissue adherence may contribute to increased antiseptic longevity compared to CHG solutions.

### 1.6 Why Iodophor Skin Preparations May Reduce Extremity Fracture Reoperations

While the primary rationale for using antiseptic skin preparation solutions is to reduce the risk of SSI, many fracture healing complications are associated with indolent infections. These low-grade infections typically do not exhibit clinical signs consistent with SSI. Instead, they present several months post-fracture fixation and are only detected from deep tissue samples collected during secondary surgeries to treat fractures that fail to heal (nonunion). Previous fracture

297 nonunion studies have identified an infectious etiology in 31–38% of cases.<sup>28,29</sup> Similarly, results  
298 from the FLOW trial suggest that 58% of the reoperation events were caused by fracture  
299 nonunion or a hardware failure related to an infection, wound-healing problem, or bone-healing  
300 problem (n= 188/323). This is consistent with the data presented in **Figure 1**, confirming a high  
301 proportion of fracture infections requiring surgery occurred beyond the 90-day surveillance  
302 period for SSI.<sup>18</sup> Therefore, given the rationale that iodophors may be more effective in  
303 preventing SSI, it is clinically plausible that its use may also reduce unplanned fracture-related  
304 reoperations.

305

### 306 **1.7 Lack of Surgeon Consensus**

307 The FLOW trial demonstrated a clear divide among orthopaedic surgeons regarding their choice  
308 to use the two most common antiseptic solutions during open fracture fixation surgery.<sup>4</sup> Iodophor  
309 solutions were used in 54% of the surgeries performed, while 41% were performed using CHG  
310 solutions. The remaining surgeons either used both iodophor and CHG (4%), or alcohol with no  
311 iodophor or CHG (1%).<sup>4</sup> Building upon the lack of consensus among orthopaedic surgeons  
312 participating in the FLOW trial, our research team conducted an internet-based survey (n = 210)  
313 and several interviews with orthopaedic surgeons to understand the reasons for the lack of  
314 consensus in the use of surgical preparation solutions. Similar to the observations of the FLOW  
315 trial, there was nearly an equal split between the use of iodophor and CHG solutions in open and  
316 closed fracture surgery. More insight was gained in interviews with the surgeons. Three main  
317 drivers for surgeon decision-making were identified: 1) they continued to use the antiseptic  
318 solution shown to them during their surgical training, 2) they used the solution recommended by  
319 their hospital, or 3) they felt the tissue toxicity was less with their chosen solution. No surgeon  
320 could cite a clinical study that helped guide their decision, despite all surgeons indicating they  
321 believed the antiseptic solution was important for reducing their patient’s risk of SSI. Limited  
322 consensus among surgeons reflects a lack of compelling evidence on the optimal approaches to  
323 surgical skin preparation, further vindicating the need for a large definitive trial.

324

325 The PREPARE Trial, A Pragmatic Randomized trial Evaluating Pre-operative Alcohol skin  
326 solutions in FRactured Extremities, will address these gaps in the literature.

327

## 328 **2.0 STUDY OBJECTIVES AND HYPOTHESES**

329

### 330 **2.1 Study Objectives and Hypotheses**

331 The overarching objective of this trial is to compare the effectiveness of iodine povacrylex (0.7%  
332 free iodine) in 74% isopropyl alcohol versus 2% CHG in 70% isopropyl alcohol for the  
333 management of extremity fractures that require surgical treatment. Open and closed fracture  
334 participants will be recruited separately to compare the independent effectiveness of the study  
335 solutions in each population. *SSI* will be the primary outcome for comparing effectiveness  
336 (primary objective), and *unplanned fracture-related reoperation* will be the secondary outcome  
337 for comparison (secondary objective). While previous randomized controlled trials in general  
338 surgery and gynecology demonstrated superior efficacy of CHG in alcohol solutions to reduce  
339 SSIs,<sup>19,20</sup> results from larger populations of general surgery patients and the recently completed  
340 FLOW trial<sup>4</sup> suggest iodophor-based solutions could be more effective than CHG in fracture  
341 patients. Therefore, we hypothesize that iodine-povacrylex is a more effective pre-operative  
342 antiseptic skin solution than CHG to reduce 90-day SSIs and unplanned fracture-related  
343 reoperations within one year of injury.

344

## 345 **2.2 Open and Closed Fracture Study Populations**

346 Open fracture patients and closed fracture patients represent two distinct populations within  
347 extremity fracture surgery. Open fractures are associated with wound complications that are  
348 approximately four times greater than closed fractures.<sup>4,5</sup> The increased baseline risk, differing  
349 fracture treatment principles, and the distinct difference of having deep tissue exposed to micro-  
350 organisms at the time of injury provides a biologic rationale for maintaining separate open and  
351 closed fracture populations. This rationale is further strengthened by data collected from our  
352 surgeon survey that suggests many surgeons use different antiseptic skin prophylaxis procedures  
353 for open and closed fracture surgeries. Therefore, definitively comparing the effectiveness of the  
354 study solutions in each fracture population addresses distinctly different treatment decisions for  
355 surgeons. Similarly, if a difference in the effectiveness between the two study solutions were  
356 detected in only one of the fracture populations this would be an independently important clinical  
357 finding that would have an immediate effect on clinical practice.

## 358 **2.3 Subgroup Objectives**

359 The PREPARE trial will also explore the possibility of differential treatment effects of the pre-  
360 operative antiseptic skin solutions among clinically important subgroups within each  
361 independent fracture population.  
362

### 363 2.3.1 Open Fracture Subgroups

364 The open fracture subgroups will be defined by i) the severity of open fracture (Gustilo-  
365 Anderson type I or II versus III);<sup>1</sup> ii) upper extremity versus lower extremity open fractures; iii)  
366 severity of wound contamination; and iv) presence or absence of comorbidities that affect wound  
367 healing.  
368

### 369 2.3.2 Closed Fracture Subgroups

370 The closed fracture subgroups will be defined by: i) severity of soft tissue injury (Tscherne grade  
371 3 versus grades 0-2), and ii) presence or absence of comorbidities that affect wound healing.  
372

### 373 2.3.3 Subgroup Hypotheses

374 It has been established that several patient and injury factors are frequently associated with worse  
375 patient outcomes after extremity fractures.<sup>30,31</sup> As a result, we hypothesize that iodine povacrylex  
376 (0.7% free iodine) in 74% isopropyl alcohol will be associated with a larger reduction in odds for  
377 SSI and unplanned fracture-related reoperations among patients with a higher risk for extremity  
378 fracture SSI. Specifically, in both the open and closed fracture populations we expect to observe  
379 this heterogeneity of treatment effect in patients with more severe soft tissue injury and patients  
380 with increased comorbidities due to the potentially broader antimicrobial coverage, stronger  
381 tissue adherence, and increased antiseptic longevity of iodine povacrylex.<sup>32</sup> The credibility of all  
382 subgroup analyses will be assessed in accordance with criteria outlined by Sun et al.<sup>33</sup>  
383

384 Within the open fracture population, high-grade soft tissue injury (Gustilo-Anderson type III),  
385 lower extremity open fractures, and moderate/severe wound contamination are established  
386 predictors of SSI and reoperations from the FLOW trial.<sup>5</sup> In addition, there are known  
387 differences in patients' skin flora based on anatomic region of injury. As a result, it is likely that  
388 the study interventions may be more effective in certain open fracture subgroups. Due to its  
389 broader spectrum of antimicrobial activity, the increased effectiveness observed by Swenson *et*  
390 *al.*, and the possible benefits observed in the FLOW trial, we hypothesize that the iodine  
391 povacrylex (0.7% free iodine) in 74% isopropyl alcohol antiseptic skin solution will be  
392

393 associated with a larger reduction in odds for SSI and reoperation in open fracture patients with  
394 Gustilo-Anderson type III fractures, lower extremity fractures, and more severely contaminated  
395 wounds.

### 396 3.0 TRIAL DESIGN

#### 397 3.1 Summary

398 This study is a multi-center pragmatic cluster randomized crossover trial with two independent  
400 populations of surgically treated fracture participants: 1) the open fracture population consisting  
401 of a minimum of 1,540 participants with open extremity fractures; and, 2) the closed fracture  
402 population of a minimum of 6,280 participants with closed lower extremity or pelvic fractures.  
403 The unit of randomization is the orthopaedic practices within clinical sites (clusters), with  
404 individual patients being the unit of analysis. The procedures for enrollment, study interventions,  
405 follow-up, and analyses within the open and closed fracture populations will follow the same  
406 protocol (with noted differences as applicable). Recruitment for each treatment group will be  
407 performed in multiple iterations of approximately two-month periods. Each orthopaedic practice  
408 will initially be randomized to use one of two pre-operative surgical skin preparation solutions  
409 (iodine povacrylex (0.7% free iodine) in 74% isopropyl alcohol versus 2% CHG in 70%  
410 isopropyl alcohol) for open and closed extremity fracture surgeries at their institution (**Figure 2**).  
411 Upon completion of the two-month period, each orthopaedic practice will crossover to the  
412 alternative treatment allocation and complete another two-month recruitment period. This  
413 process of alternating treatment periods (crossovers) will continue until the minimum sample  
414 size is achieved for each fracture population and the study's budgeted recruitment duration is  
415 completed.  
416

417  
418 Upon completion of recruitment, it is expected that each orthopaedic practice will enroll a  
419 minimum of 77 open fracture patients and 314 closed lower extremity or pelvic fracture patients  
420 per treatment (a minimum of 154 open fracture patients and 628 closed lower extremity or pelvic  
421 fracture patients in total) as applicable, and that most clinical sites will exceed this minimum  
422 recruitment goal. Clinical site personnel will screen potential patients for eligibility, and if  
423 eligible, they will be invited to participate in the trial. Study participants will be assessed at  
424 regular intervals in the one year following their fracture. The primary outcome will include any  
425 SSI event from the time of fracture to the end of the 30- and 90-day post-operative periods from  
426 their definitive fracture management surgery. The secondary outcome will include unplanned  
427 fracture-related reoperations that occur within one-year of their fracture. A blinded Adjudication  
428 Committee will review SSIs and unplanned fracture-related reoperations to confirm that they  
429 meet the criteria for being a study event.  
430

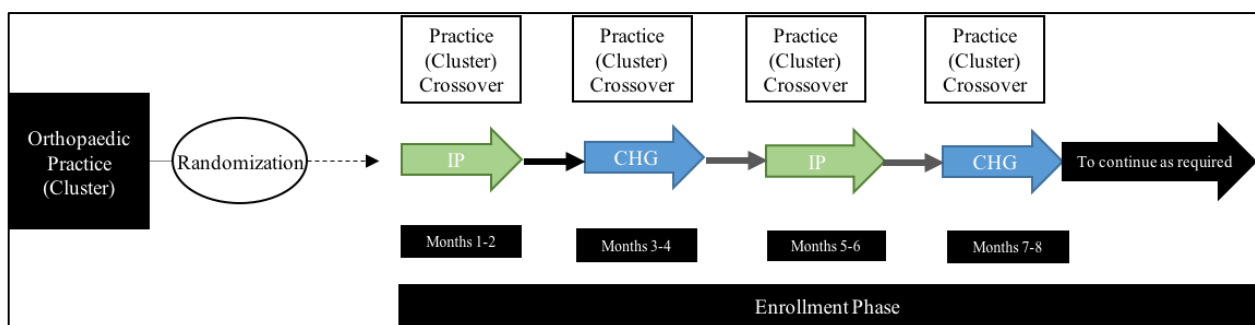

431 **Figure 2: Randomized Treatment Allocation, Cluster Crossover, and Recruitment**  
432

433 **3.2 Pragmatic-Explanatory Continuum**

434 In accordance with recommended methodology standards, we have used the PRagmatic-  
 435 Explanatory Continuum Indicator Summary (PRECIS-2) toolkit to evaluate the PREPARE trial  
 436 design decisions to determine whether these decisions will lead to a study that answers, “Does  
 437 this intervention work under usual conditions?” (pragmatic) versus “Can this intervention work  
 438 under ideal conditions?” (explanatory). The PRECIS-2 tool uses a 5-point Likert scale in 9  
 439 domains to evaluate the continuum of design choices. A domain score of 5 indicates “very  
 440 pragmatic,” while a score of 1 suggests “very explanatory.” **Table 1** outlines the investigators’  
 441 assessment of the trial design and the rationale for each assessed score and **Figure 3** displays the  
 442 PRECIS-2 wheel.

443  
 444

**Table 1: PRECIS-2 Score**

| Domain                         | Score | Rationale                                                                                                                                                                                                                                                                                                                                                                                                                                                                 |
|--------------------------------|-------|---------------------------------------------------------------------------------------------------------------------------------------------------------------------------------------------------------------------------------------------------------------------------------------------------------------------------------------------------------------------------------------------------------------------------------------------------------------------------|
| <i>Eligibility</i>             | 5     | Eligibility criteria are very broad and include all fracture patients that would be treated in all hospital environments.                                                                                                                                                                                                                                                                                                                                                 |
| <i>Recruitment</i>             | 5     | Recruitment of all consenting fracture patients treated at each participating hospital will be performed.                                                                                                                                                                                                                                                                                                                                                                 |
| <i>Setting</i>                 | 4     | Recruitment is occurring at multiple sites across the US and Canada; however, since most of the recruiting hospitals are regional referral centers the setting is “mostly pragmatic.”                                                                                                                                                                                                                                                                                     |
| <i>Organization</i>            | 5     | The interventions do not need an increase in providers or care delivery compared to the usual antiseptic care provided. For each antiseptic solution, a brief in-service training session will be provided to the clinical sites, as per any new product/procedure that is being introduced into an operating room.                                                                                                                                                       |
| <i>Flexibility (delivery)</i>  | 5     | The interventions will be delivered in the usual care manner with no advice on allowed co-interventions or strict protocols to ensure compliance.                                                                                                                                                                                                                                                                                                                         |
| <i>Flexibility (adherence)</i> | -     | This section is left blank according to PRECIS-2 guidance because the intervention is provided prior to patient consent and individual patient compliance is not an issue. If provider adherence is considered, the study design is rather pragmatic (4) because there will be limited encouragement to follow the manufacturer’s directions for use, other than periodic newsletters, investigator meetings, and possible provider survey during the recruitment period. |
| <i>Follow-up</i>               | 5     | All study follow-up is consistent with usual care.                                                                                                                                                                                                                                                                                                                                                                                                                        |
| <i>Primary outcome</i>         | 5     | The outcome has been validated by patients as being very relevant to the study participants and it does not require specialized expertise beyond the treating physician for diagnosis.                                                                                                                                                                                                                                                                                    |
| <i>Primary analysis</i>        | 5     | All available study data will be used for analysis following the intention to treat principle.                                                                                                                                                                                                                                                                                                                                                                            |

445  
 446  
 447

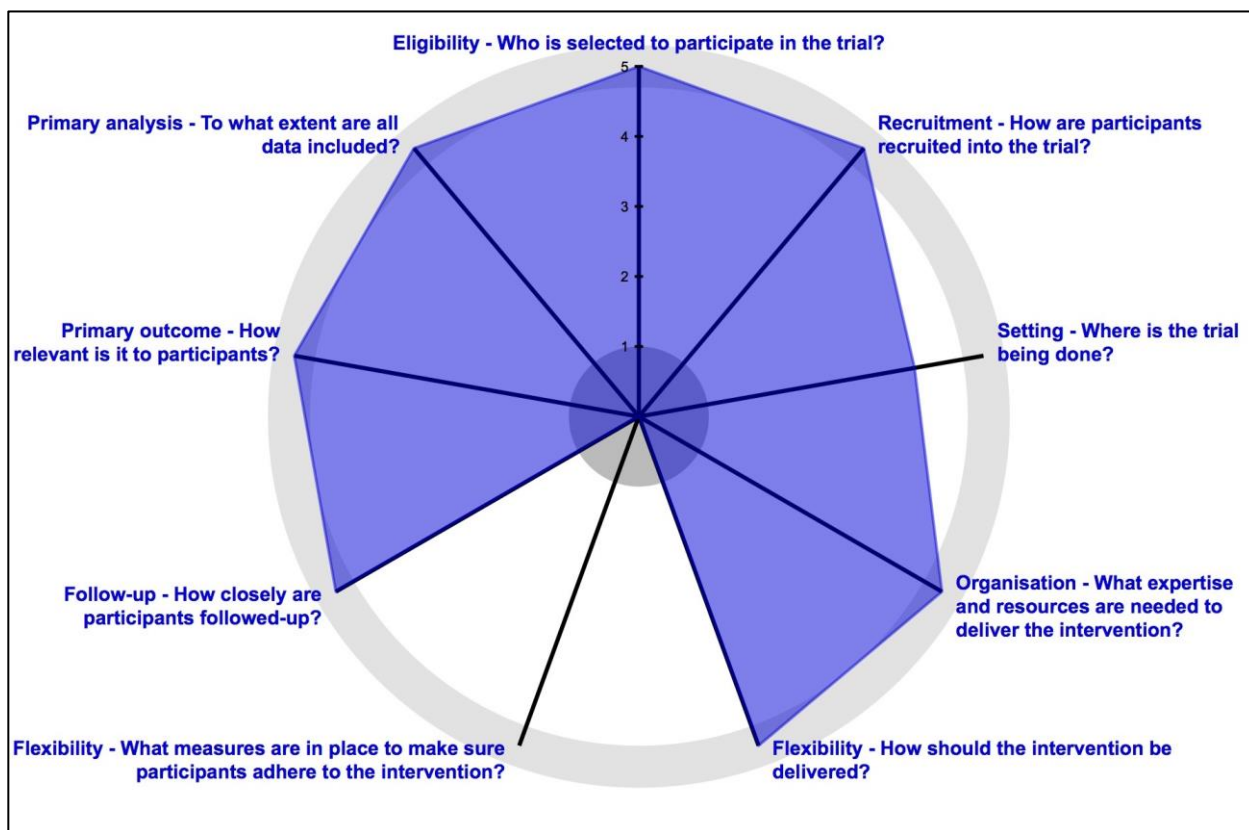

448  
449 **Figure 3: PRECIS-2 Wheel**

450  
451 **4.0 METHODS**

452  
453 **4.1 Study Setting, Cluster Eligibility, and Selection of Clusters**

454 This study will be coordinated by the Methods Center at the Center for Evidence-Based  
455 Orthopaedics (CEO), McMaster University, Hamilton, Ontario and by the Administrative Center  
456 within the Department of Orthopaedics at the University of Maryland School of Medicine, R  
457 Adams Cowley Shock Trauma Center, Baltimore, Maryland. Patients will be enrolled from at  
458 least 18 clinical sites in North America. Clusters (orthopaedic practices within clinical sites) will  
459 be carefully screened prior to participation in the PREPARE trial. Clinical site inclusion criteria  
460 are: 1) adequate research personnel infrastructure to manage the study; 2) adequate open fracture  
461 volume and closed lower extremity and pelvic fracture volume to complete enrollment within the  
462 study timeline (i.e., a minimum of 77 open fractures and 314 closed lower extremity fractures per  
463 year); 3) commitment from all or most orthopaedic surgeons to participate in the trial; and 4)  
464 ability to use the two alcohol-based skin preparation solutions. The exclusion criteria are: 1) lack  
465 of interest in the trial; 2) anticipated challenges with complying with the protocol; 3) conflicting  
466 studies, in the judgment of the Principal Investigators, that would inhibit patient participation;  
467 and 4) budgeting or contract constraints.

468  
469 The screening process will begin with potential clinical sites completing a feasibility  
470 questionnaire that asks about research experience and infrastructure, fracture volume, current  
471 practice patterns, and interest in participating in the trial. Clinical sites that meet the eligibility  
472 criteria at this stage will be invited to participate in a series of teleconferences to review study  
473 and clinical logistics in detail with members of the study team. The Principal Investigators and



474 study personnel will further vet the clinical sites during these calls and will ask about hospital  
475 and patient demographics to ensure that a variety of fracture patient populations and referral  
476 patterns, ranging from large urban trauma centers to smaller referral hospitals, are included in the  
477 PREPARE trial. Study personnel will document reasons for clinical site ineligibility. Upon  
478 selection, clinical sites will be asked to complete a questionnaire that will detail current surgeon  
479 preferences and practices for pre-operative surgical preparation techniques and co-interventions  
480 known to influence the incidence of SSIs (see Section 4.7).

481

## 482 **4.2 Eligibility Criteria**

483 Broad eligibility criteria will be used to increase the generalizability of the trial. Potential  
484 participants will be enrolled into only one of the study populations depending on whether they  
485 meet the open or closed fracture population criteria (Section 4.2.1 or 4.2.2). Participants who  
486 meet the initial criteria for both populations will be assigned to a study population based on the  
487 criteria outlined in Section 4.2.3.

488

### 489 4.2.1 Open Fracture Population Eligibility Criteria

490 The open fracture inclusion criteria are:

- 491 1. Patients 18 years of age or older.
- 492 2. Open fracture of the appendicular skeleton.
- 493 3. Received or will receive definitive fracture treatment with a surgical implant(s) (i.e.,  
494 internal fixation, external fixation, joint prosthesis, etc.).
- 495 4. Open fracture wound management that includes formal surgical debridement within 72  
496 hours of their injury.
- 497 5. Will have all planned fracture care surgeries performed by a participating surgeon or  
498 delegate.
- 499 6. Informed consent obtained.
- 500 7. Patient enrolled within 3 weeks of their fracture.

501

502 The open fracture exclusion criteria are:

- 503 1. Fracture of the hand (distal to radial carpal joint).
- 504 2. Patients who did not or will not receive the allocated pre-operative surgical preparation  
505 solution due to a medical contraindication.
- 506 3. Received previous surgical debridement or management of their fracture at a non-  
507 participating hospital or clinic (as applicable).
- 508 4. Open fracture managed outside of the participating orthopaedic service (e.g., foot fracture  
509 managed by podiatrist).
- 510 5. Chronic or acute infection at or near the fracture site at the time of initial fracture surgery.
- 511 6. Burns at the fracture site.
- 512 7. Incarceration.
- 513 8. Expected injury survival of less than 90 days.
- 514 9. Terminal illness with expected survival less than 90 days.
- 515 10. Currently enrolled in a study that does not permit co-enrollment.
- 516 11. Unable to obtain informed consent due to language barriers.
- 517 12. Likely problems, in the judgment of study personnel, with maintaining follow-up with the  
518 patient.
- 519 13. Prior or current enrollment in a PREP-IT trial.
- 520 14. Enrolled in the PREPARE closed cohort.
- 521 15. Excluded due to sampling strategy.

522  
523  
524  
525  
526  
527  
528  
529  
530  
531  
532  
533  
534  
535  
536  
537  
538  
539  
540  
541  
542  
543  
544  
545  
546  
547  
548  
549  
550  
551  
552  
553  
554  
555  
556  
557  
558  
559  
560  
561  
562  
563  
564  
565  
566  
567  
568  
569

#### 4.2.2 Closed Fracture Population Eligibility Criteria

The closed fracture inclusion criteria are:

1. Patients 18 years of age or older.
2. Closed fracture of the lower extremity or pelvis.
3. Received or will receive definitive fracture treatment with a surgical implant(s) (i.e., internal fixation, external fixation, joint prosthesis, etc.).
4. Fracture management requires a surgical incision (i.e., for fracture reduction or implant insertion).
5. Will have all planned fracture care surgeries performed by a participating surgeon or delegate.
6. Informed consent obtained.
7. Patient enrolled within 6 weeks of their fracture.

The closed fracture exclusion criteria are:

1. Patients who did not or will not receive the allocated pre-operative surgical preparation solution due to a medical contraindication.
2. Received previous surgical management of their fracture at a non-participating hospital or clinic.
3. Fracture managed outside of the participating orthopaedic service (e.g., foot fracture managed by podiatrist).
4. Chronic or acute infection at or near the fracture site at the time of initial fracture surgery.
5. Burns at the fracture site.
6. Incarceration.
7. Expected injury survival of less than 90 days.
8. Terminal illness with expected survival less than 90 days.
9. Currently enrolled in a study that does not permit co-enrollment.
10. Unable to obtain informed consent due to language barriers.
11. Likely, problems, in the judgment of study personnel, with maintaining follow-up with the patient.
12. Prior or current enrollment in a PREP-IT trial.
13. Enrolled in the PREPARE open cohort.
14. Excluded due to sampling strategy.

#### 4.2.3 Additional Eligibility Considerations

1. Patients with multiple fractures will be eligible for inclusion.
  - a. In patients with one or more open and one or more closed fractures, study personnel will determine whether the participant will be enrolled in the open or closed fracture population. This will be determined by identifying the fracture with the highest anticipated risk of SSI. In most cases, the open fracture will be selected, and the participant will be designated to the open fracture population; however, it is possible that a closed lower extremity fracture may have a higher anticipated SSI risk compared to an open fracture. A plausible example would be a Tscherne grade 3 closed intra-articular distal tibia fracture versus a Gustilo-Anderson type I open distal radius fracture.
  - b. Once the participant is designated to the applicable open or closed fracture population, study personnel will collect data on up to three eligible fracture regions. If a participant is in the open fracture population, then only eligible

570 regions with open fractures will be included. Similarly, only closed lower  
571 extremity or pelvic fracture regions will be included if the participant is in the  
572 closed fracture population. In patients with more than three eligible fracture  
573 regions, the treating surgeon will determine the three regions with the most severe  
574 fractures.

575 c. For each fracture, the entire injured anatomic region will be included.<sup>34</sup> Therefore,  
576 if there are two fractures that anatomically communicate, they will be considered  
577 within the same region (e.g., within the shoulder region, forearm, etc.). For open  
578 fracture participants, adjacent closed fractures that anatomically communicate  
579 with an open fracture or are treated within the same surgical incision will be  
580 included in the open fracture region. Common examples of these include forearm  
581 fractures, tibia/fibula fractures, and peri-articular fractures. The anatomic joint  
582 region, adjacent fractures, and contiguous wounds will be defined at the time of  
583 patient enrollment on the case report forms (CRFs).

584 d. All included fracture regions should be treated with the same allocated antiseptic  
585 skin solution as per the cluster randomization.

586 2. At the time of screening, patients who are in another study who meet eligibility criteria  
587 are to be included in the PREPARE trial unless the other trial does not permit co-  
588 enrollment.

589 3. Closed fractures that are definitively managed without a surgical incision will be  
590 excluded (e.g., stab incisions and pin sites) because a localized stab wound or pin site  
591 infection does not meet the CDC definition for SSI. If there is an associated surgical  
592 incision, these fractures will be included (e.g., open reduction and fixation with an  
593 external fixator, k-wires, etc.).

594

## 595 **4.3 Recruitment Strategy**

### 596 4.3.1 Patient Screening & Consent

597 Patients 18 years of age or older who present to a recruiting hospital for treatment of an open  
598 fracture of the appendicular skeleton will be screened for participation within 3 weeks of their  
599 fracture. Patients 18 years of age or older who present to a recruiting hospital for surgical  
600 treatment of a closed lower extremity or pelvic fracture(s) will be screened for participation  
601 within 6 weeks of their fracture. To screen patients for eligibility, designated study personnel at  
602 each clinical site will develop a patient enrollment plan. This plan will typically consist of daily  
603 participation in orthopaedic patient rounds and a review of daily listings of hospital admissions for  
604 patients with open fractures and or closed lower extremity or pelvic fractures. Upon identification,  
605 the study personnel will screen the patient for eligibility and if eligible, approach them for informed  
606 consent. Study participants with open fractures must be enrolled within 3 weeks of their fracture(s)  
607 and study participants with closed fractures must be enrolled within 6 weeks of their fracture(s).  
608 Enrollment may take place at any time within this window. If the patient is unable to provide  
609 informed consent (e.g., due to their injury) at the time they were initially identified, informed  
610 consent may be delayed until they are able to provide informed consent. Alternatively, if the patient  
611 is unable to provide informed consent, informed consent may be obtained from their proxy, with  
612 consent obtained from the patient when/if the patient is able to provide consent. Allowing informed  
613 consent from a patient's proxy healthcare decision maker will reduce the risk of recruitment bias  
614 against the most severely injured patients. In addition, potentially eligible patients will be  
615 approached to participate in the trial, even if they did not receive the correct pre-operative  
616 antiseptic skin solution. This is consistent with the ITT principle and is necessary to maintain the

617 prognostic balance achieved during the cluster randomization. All screened patients will be  
 618 classified as included, excluded, or missed. See **Table 2** below for the Schedule of Events.

619  
 620 **Table 2: Schedule of Events**

| Assessment                                                  | Visit 1:<br>Enrollment | Visit 2:<br>6 weeks post-<br>fracture | Visit 3:<br>3 months<br>post-fracture | Visit 4:<br>6 months<br>post-fracture | Visit 5:<br>9 months<br>post-fracture | Visit 6:<br>12 months<br>post-fracture |
|-------------------------------------------------------------|------------------------|---------------------------------------|---------------------------------------|---------------------------------------|---------------------------------------|----------------------------------------|
| Eligibility Screening                                       | •                      |                                       |                                       |                                       |                                       |                                        |
| Informed Consent                                            | •                      |                                       |                                       |                                       |                                       |                                        |
| Collection of Demographic and Fracture Characteristics Data | •                      |                                       |                                       |                                       |                                       |                                        |
| Collection of Surgical Data                                 | •                      |                                       |                                       |                                       |                                       |                                        |
| Collection of Peri-Operative Data                           | •                      |                                       |                                       |                                       |                                       |                                        |
| Collection SSI Data                                         | •                      | •                                     | •                                     | •                                     | •                                     | •                                      |
| Collection of Reoperation Data                              | •                      | •                                     | •                                     | •                                     | •                                     | •                                      |
| Collection of SAE Data                                      | •                      | •                                     | •                                     | •                                     | •                                     | •                                      |

621 For patients with open fractures, informed consent and enrollment must occur within the 3 weeks (21 days) from the  
 622 patient’s fracture (Day 0 is the date of the fracture). For patients with closed fractures, informed consent and  
 623 enrollment must occur within the 6 weeks (42 days) from the patient’s fracture (Day 0 is the date of the fracture).  
 624 Visits are to be completed at routine clinic visits. When necessary, visits may also be completed by telephone, text,  
 625 email, standard mail, and/or a review of the participant’s medical record.  
 626 Follow-up visit windows touch so that participants will always fall into a specific window. The windows are: 4 to 8  
 627 weeks (i.e., 28 to 56 days), 2 to 4.5 months (i.e., 57 to 137 days), 4.5 to 7.5 months (i.e., 138 to 228 days), 7.5 to 12  
 628 months (i.e., 229 to 365 days), and greater than 12 months (366 to 730 days), respectively, from the participant’s  
 629 fracture.

630  
 631 **4.4 Managing Patient Volume**

632 When the volume of eligible patients exceeds a participating site’s ability to effectively enroll  
 633 and follow all eligible patients, two strategies are available to manage patient volume and ensure  
 634 that enrollment targets are met. Clinical sites may obtain permission from the Methods Centre to  
 635 use either one or both of these strategies.

636  
 637 **4.4.1 Enrollment of Patients from Only One Fracture Cohort**

638 To manage patient volume, clinical sites may obtain permission from the Methods Centre to only  
 639 enroll patients from one fracture cohort (i.e., open fracture cohort or closed fracture cohort), as  
 640 opposed to both. When this strategy is used, clinical sites will only approach patients from the  
 641 fracture population selected (i.e., they will only enroll patients with open fractures or only enroll  
 642 patients with closed fractures). The Methods Centre will work with clinical sites to determine  
 643 the fracture population from which patients should be recruited. Additionally, sites with  
 644 competing studies may also enroll into one fracture cohort only. For example, clinical sites who

645 are participating in the Aqueous-PREP trial (sister trial to PREPARE), may participate in  
646 PREPARE by enrolling patients into the closed fracture cohort alone.

647

#### 648 4.4.2 Enrollment Sampling Plan

649 A sampling strategy is available within the REDCap Cloud electronic data capture (EDC) system  
650 which will randomly determine whether an eligible patient should be approached for consent and  
651 inclusion in the study. The randomization software will use randomly selected block sizes  
652 consistent with the sampling ratio being used during the recruitment periods. Examples of  
653 potential random sampling strategies a site may use include:

654

- 655 1. For every three eligible patients, there will be one excluded eligible patient (3:1 ratio).
- 656 2. For every two eligible patients, there will be one excluded eligible patient (2:1 ratio).
- 657 3. For each eligible patient, there will be one excluded eligible patient (1:1 ratio).
- 658 4. For each eligible patient, there will be two excluded eligible patients (1:2 ratio).
- 659 5. For each eligible patient, there will be three excluded eligible patients (1:3 ratio).

660

661 The number of eligible patients approached for consent and inclusion in the study, and the  
662 number of eligible patients that are excluded due to a sampling strategy will be documented in  
663 the EDC system.

664

665 For sites enrolling patients from both open and closed fracture populations, the enrollment  
666 sampling plan may differ between the open and closed fracture populations. Therefore, it is  
667 possible that a recruiting cluster may achieve their overall enrollment goal sooner in one  
668 population than the other. If this occurs, Methods Center personnel may instruct the recruiting  
669 cluster to stop enrollment of the completed population and continue enrollment of only the other  
670 fracture population. This decision will be made based on the overall study recruitment,  
671 timelines, and other logistical concerns.

672

#### 673 **4.4 Randomization Methods**

674 Treatment allocation will be determined using a cluster-randomized crossover trial design. The  
675 order of treatment allocation for each orthopaedic practice (cluster) will be randomly assigned  
676 using a computer-generated randomization table. Each site will start with the initially allocated  
677 study solution and crossover to the other solution for their second recruitment period. Both the  
678 open fracture and closed lower extremity and pelvic fracture populations will receive the same  
679 treatment allocation and follow the same crossover schedule. The process of alternating  
680 treatments will repeat approximately every two months as dictated by the initial randomization.  
681 For sites that enroll for more than 1 year, the order of treatment allocation may be reversed after  
682 12 months to ensure equal distribution of each treatment across each calendar month in the  
683 study's duration (**Figure 2**). Randomization will be completed by personnel at the CEO Methods  
684 Center at the onset of the trial. Personnel from the Methods Center will notify personnel at each  
685 participating clinical site of their treatment allocation order. This will allow each participating  
686 clinical site to begin preparing for the first run-in period.

687

#### 688 **4.5 Blinding**

689 The orthopaedic team (including the study coordinators) cannot be blinded to the treatment  
690 allocation as the antiseptic solutions are visually distinguishable and these individuals need to  
691 lead the implementation of the cluster-crossover protocol at their clinical site. The Adjudication  
692 Committee Members and data analysts will be blinded to the study treatment. All interpretations

693 of study results will initially be done in a blinded manner by developing two interpretations of  
694 the results. One interpretation will assume treatment A is iodine povacrylex (0.7% free iodine) in  
695 74% isopropyl alcohol, the other interpretation will assume it is 2% CHG in 70% isopropyl  
696 alcohol. Once the data interpretations for each assumption are finalized, the data will be  
697 unblinded and the correct interpretation will be accepted.<sup>35</sup>  
698

## 699 **4.6 Description of the Interventions**

### 700 4.6.1 Initial Run-In Phase

701 Prior to initiating patient recruitment, each clinical site will begin using their assigned pre-  
702 operative antiseptic skin solution for eligible fracture surgeries (run-in period) to ensure that  
703 acceptable compliance is met before initiating participant enrollment. Acceptable compliance  
704 during the run-in phase will be defined as at least 15 eligible open fracture patients and at least  
705 15 closed lower extremity or pelvic fractures patients with >90% of eligible patients receiving  
706 the allocated antiseptic solution or a minimum of one month in duration. The run-in phase may  
707 be extended up to 3 months, as deemed necessary by the CEO Methods Center. Study personnel  
708 at each clinical site will document compliance with administering the allocated treatment during  
709 the run-in phase and submit this weekly to the CEO Methods Center. Specifically, the weekly  
710 reports will include the total number of eligible operative patients within the open fracture  
711 population and the closed fracture population, the proportion who received the assigned pre-  
712 operative antiseptic skin solution, and the proportion who did not receive the assigned pre-  
713 operative antiseptic skin solution along with details about the deviations (e.g., name of attending  
714 surgeon, solution used, rationale for not using the assigned pre-operative antiseptic skin  
715 solution). This portion of the study protocol is for quality assurance during the initial  
716 implementation of the trial procedures. Fracture surgeries reviewed during the run-in phase will  
717 not be included in the trial. Similarly, these patients will not be approached for informed consent  
718 and no individual patient-level data will be submitted. CEO Methods Center personnel will  
719 review the weekly reports with each of the clinical sites and develop strategies, as needed, to  
720 ensure acceptable compliance during the run-in phase. This weekly communication will prevent  
721 any delays in transitioning to the participant enrollment phase.  
722

### 723 4.6.2 First Intervention Phase

724 Once the initial run-in phase is completed, participant recruitment will begin with the clinical  
725 sites continuing to use the same pre-operative antiseptic skin solution for all eligible fracture  
726 surgeries within the open and closed fracture populations over a two-month period. Patients will  
727 receive the initially allocated treatment solution for all of their fracture management surgeries,  
728 including repeat planned surgeries, even if a planned subsequent surgery occurs during a  
729 recruitment period using the non-allocated solution. Participating clusters will ideally be able to  
730 enroll a minimum of 77 open fracture patients and 314 closed lower extremity and pelvic  
731 fractures per treatment over the total study recruitment duration (total of 154 open fracture  
732 patients and 628 closed lower extremity and pelvic fracture patients), and it is anticipated that  
733 most recruiting centers will exceed this minimum goal. Methods Center personnel will continue  
734 to monitor compliance with the assigned pre-operative antiseptic skin solution over the  
735 enrollment phase and work collaboratively with the clinical sites to minimize cases in which a  
736 patient receives the incorrect solution. These monitoring activities will coincide with site-specific  
737 procedures to maintain compliance for all patients, even those requiring multiple surgical  
738 procedures. All assessments of compliance will be analyzed separately for the open and closed  
739 fracture populations. If a fracture requires multiple surgeries and the correct solution is not

740 applied at each procedure, the patient will remain in the study and be analyzed using the  
741 allocated solution (ITT principle).

742

#### 743 4.6.3 Second Intervention Phase

744 Once the first intervention phase is completed, each site will crossover to the opposite study  
745 solution. This crossover will occur simultaneously in the open and closed fracture populations.  
746 There will be no run-in phase for the second solution and each site will need to develop local  
747 procedures to ensure a successful crossover. Example procedures to minimize carry-forward of  
748 first solution into the second solution phase include: 1) removing the bottles of the first solution  
749 from the orthopaedic operating rooms; 2) changing study posters and notifications within the  
750 operating rooms; and 3) performing the crossover during the middle of the week to provide a few  
751 days' notice to the operating room staff and to avoid contamination of recent fracture patients  
752 returning for repeat procedures (e.g., weekend admissions). The enrollment goals and procedures  
753 will mirror the first intervention phase. Methods Center personnel will continue to monitor  
754 compliance with the assigned pre-operative antiseptic skin solution over the enrollment phase  
755 and work collaboratively with the clinical sites to reduce the risk of contamination.

756

#### 757 4.6.4 Special Considerations for Ongoing Treatment Crossovers

758 Treatment allocation will continue to alternate between the study solutions, as outlined above,  
759 for the remainder of study duration. Each intervention phase will be approximately two months  
760 in duration, as agreed upon by the clinical site and CEO Methods Center personnel. The duration  
761 may be modified to avoid crossovers on holidays, weekends, and other circumstances that could  
762 threaten a successful crossover. The expected recruitment duration for the trial is approximately  
763 24 months; however, some sites may have a shorter total recruitment duration (e.g., a  
764 participating site that joins the trial later, high volume clinical sites, etc.). The two-month  
765 enrollment periods will help account for seasonal variability in SSI incidence and their  
766 associated infectious organisms,<sup>36</sup> as each crossover period will cover a season. In addition, for  
767 those clinical sites enrolling beyond 12 months, the distribution of recruitment periods for each  
768 solution may be seasonally matched by reversing the order of the alternating allocation after 12  
769 months of recruitment.

770

#### 771 4.6.5 Evaluation of Site Performance and Removal of Clinical Sites

772 After every two recruitment periods (approximately every four months), each site will be  
773 evaluated for continued participation in the trial. Sites with <90% of eligible patients receiving  
774 the allocated solution, differential adherence between study solutions, <95% follow-up of the  
775 primary outcome, <90% follow-up of the secondary outcome, incomplete data submission, or  
776 other threats to data quality or the validity of the study may be withdrawn from the trial. In the  
777 event a site is withdrawn, data collection will be completed for all enrolled participants and these  
778 data will be included in the final study analysis.

779

#### 780 4.6.6 Application of Pre-Operative Antiseptic Skin Solutions

781 Each solution will be applied to the skin and allowed to dry for a minimum of three minutes.  
782 While the application and minimum drying time for both study solutions are very similar, local  
783 study personnel will provide standardized in-service (training) for orthopaedic surgeons,  
784 operating room technicians, and nurses at each participating hospital prior to the initial run-in  
785 phase. This training should include reviewing the manufacturers' directions for use to help  
786 minimize incorrect application at clinical sites that may not routinely use both solutions. In

787 addition, the manufacturers may also provide demonstration videos and posters for continued  
788 refresher training for each solution.

789  
790 The study protocol will mandate the antiseptic skin solution to be used in each intervention phase  
791 (Sections 4.4, 4.6.1, 4.6.2, 4.6.3, and 4.6.4); however, the protocol will remain pragmatic to  
792 variability in the actual application of the solutions and other co-intervention steps performed  
793 during the entire pre-operative skin preparation process performed in the operating room. Based  
794 on individual surgeon preference, this often includes mechanically removing visible dirt or  
795 debris with a scrub brush, and/or cleaning the limb with isopropyl alcohol or an antiseptic scrub  
796 solution. These additional skin preparation steps will be permitted provided that: 1) the final skin  
797 preparation step prior to surgical incision is the application of the allocated antiseptic solution;  
798 and, 2) participating surgeons continue to use the same skin preparation co-interventions in both  
799 intervention phases. Co-interventions that contain the opposite active ingredient from the current  
800 intervention phase (e.g., using a CHG scrub brush during the iodine intervention phase, or  
801 conversely, using an iodine scrub during the CHG intervention phase) should be avoided;  
802 however, deviations from this recommendation will be permitted to maintain pragmatic  
803 *flexibility of delivery* and reflect real-world clinical practice. The details of all operating room  
804 antiseptic co-interventions will be documented.

805

#### 806 4.6.7 Patients with Multiple Planned Surgeries

807 Fracture patients who require multiple planned surgeries for their injury will receive the same  
808 antiseptic skin solution during each subsequent procedure. Methods Center personnel will work  
809 with each of the clinical sites to develop strategies for minimizing crossovers. For example, for  
810 patients who require multiple surgeries and are enrolled within 14 days of the anticipated end of  
811 a recruitment period, study personnel will develop local procedures to identify these patients as  
812 study participants and indicate the patient's allocated antiseptic solution in the medical chart and  
813 CRFs.

814

#### 815 4.6.8 Iodophor Antiseptic Solution

816 The iodine-based treatment intervention will be an antiseptic solution comprised of iodine  
817 povacrylex (0.7% free iodine) in 74% isopropyl alcohol. 3M™ DuraPrep™ [3M Health Care, St  
818 Paul, MN], will be the commercial product used. Clinical site personnel will store and handle the  
819 product as per the manufacturers' recommendations. Operating room personnel will apply the  
820 solution to the operative site as the final preoperative skin antisepsis preparation immediately  
821 prior to commencing surgical fixation. They will apply the solution as per manufacturer's  
822 directions for use (e.g., technique of application, duration of application, drying time, drying  
823 techniques, replacement of draping, etc.).

824

#### 825 4.6.9 CHG Antiseptic Solution

826 The CHG solution will contain 2% CHG in 70% isopropyl alcohol as the only active ingredients.  
827 Products that list other inactive ingredients will be permitted. ChlorPrep® [CareFusion Inc.,  
828 Leawood, KS, USA] will be the commercial product used. Clinical site personnel will store and  
829 handle the product as per the manufacturers' recommendations. Operating room personnel will  
830 apply the solution to the operative site as the final preoperative skin antisepsis preparation  
831 immediately prior to commencing surgical fixation. They will apply the solution as per  
832 manufacturer's directions (e.g., technique of application, duration of application, drying time,  
833 replacement of draping, etc.).

834



835 **4.7 Perioperative Co-Interventions**

836 To optimize the internal validity of the trial findings, key details of co-interventions known to  
837 influence the incidence of SSIs will be documented. Hospitals typically implement standard  
838 procedures to achieve quality process benchmarks designed to minimize SSIs. These benchmarks  
839 are outlined in several similar guidelines such as the Joint Commission’s Surgical Care  
840 Improvement Project 10 Core Measures to prevent SSI, the Society for Healthcare Epidemiology  
841 of America compendium to prevent SSI, and prevention guides from the Institute for Healthcare  
842 Improvement and the Association of periOperative Registered Nurses. While these guidelines  
843 mandate core benchmark processes to minimize SSI, it is not practical or generalizable for the  
844 trial protocol to standardize the steps taken or co-interventions performed to achieve these core  
845 measures, since each participating hospital will already have their own implemented procedures.  
846 This is the primary rationale for the cluster-crossover design, in which each participating hospital  
847 will act as its own control for the effect of co-interventions. Therefore, four key approaches to  
848 account for and limit the potential differential application of co-interventions during the study  
849 periods will be performed: 1) study periods for each intervention are kept relatively short to  
850 improve the likelihood that newly implemented co-interventions will be equally distributed  
851 across both treatment solutions; 2) encourage participating hospitals not to make changes to their  
852 existing infection prevention interventions during the study periods; 3) document the co-  
853 interventions being used in the hospitals throughout the study periods; and 4) record any changes  
854 in co-interventions that do occur if mandated by a participating hospital’s administration. To this  
855 end, a monitoring tool containing a list of commonly applied prophylactic co-interventions being  
856 used at the participating clinical sites will be completed approximately every four months to  
857 document any changes to their infection prevention strategies during the study period.  
858

859 **4.8 Outcome Measures**

860 **4.8.1 Primary Outcome**

861 The primary outcome is SSI, guided by the CDC’s National Healthcare Safety Network reporting  
862 criteria (2017),<sup>25</sup> which includes superficial incisional SSI within 30 days and deep incisional or  
863 organ/space SSI within 90 days of fracture surgery (**Table 3**). Since the management of some  
864 fractures may have more than one operative procedure as part of an intentionally staged surgical  
865 plan (e.g., multiple irrigation and debridements, wound closures, temporary stabilization  
866 surgeries, definitive fixation surgery), the primary outcome will include any SSI event from the  
867 date of fracture to the end of the 30- and 90-day post-operative surveillance periods from their  
868 definitive fracture management surgery. For participants with multiple fracture regions, the date  
869 of the definitive fracture management surgery will be matched to the fracture region with the  
870 SSI.  
871

872 **Table 3: CDC Surgical Site Infection Criteria**

| Outcome                           | Description                                                                                                                                                                                                                                                                                                                                                                                                                                                                                                                                                                                                                                                                   |
|-----------------------------------|-------------------------------------------------------------------------------------------------------------------------------------------------------------------------------------------------------------------------------------------------------------------------------------------------------------------------------------------------------------------------------------------------------------------------------------------------------------------------------------------------------------------------------------------------------------------------------------------------------------------------------------------------------------------------------|
| <i>Superficial Incisional SSI</i> | Date of event for infection occurs from the date of fracture to 30 days after the definitive fracture management surgery (where day 1 = the procedure date)<br><b>AND</b><br>involves only skin and subcutaneous tissue of the incision<br><b>AND</b><br>patient has at least one of the following:<br>a. purulent drainage from the superficial incision.<br>b. organisms identified from an aseptically-obtained specimen from the superficial incision or subcutaneous tissue by a culture or non-culture based microbiologic testing method which is performed for purposes of clinical diagnosis or treatment (e.g., not Active Surveillance Culture/Testing [ASC/AST]). |

| Outcome                    | Description                                                                                                                                                                                                                                                                                                                                                                                                                                                                                                                                                                                                                                                                                                                                                                                                                                                                                                                                                                                                                                                                                                                                                                                                                                                                                                                                                                                                                                     |
|----------------------------|-------------------------------------------------------------------------------------------------------------------------------------------------------------------------------------------------------------------------------------------------------------------------------------------------------------------------------------------------------------------------------------------------------------------------------------------------------------------------------------------------------------------------------------------------------------------------------------------------------------------------------------------------------------------------------------------------------------------------------------------------------------------------------------------------------------------------------------------------------------------------------------------------------------------------------------------------------------------------------------------------------------------------------------------------------------------------------------------------------------------------------------------------------------------------------------------------------------------------------------------------------------------------------------------------------------------------------------------------------------------------------------------------------------------------------------------------|
|                            | <p>c. superficial incision that is deliberately opened by a surgeon, attending physician or other designee and culture or non-culture based testing is not performed.</p> <p style="text-align: center;"><b>AND</b></p> <p>patient has at least one of the following signs or symptoms: pain or tenderness; localized swelling; erythema; or heat.</p> <p>d. diagnosis of a superficial incisional SSI by the surgeon or attending physician or other designee.</p> <p>The following do not qualify as criteria for meeting the definition of superficial SSI:</p> <ul style="list-style-type: none"> <li>• Diagnosis/treatment of cellulitis (redness/warmth/swelling), by itself, does not meet criterion “d” for superficial incisional SSI. Conversely, an incision that is draining or that has organisms identified by culture or non-culture based testing is not considered a cellulitis.</li> <li>• A stitch abscess alone (minimal inflammation and discharge confined to the points of suture penetration).</li> <li>• A localized stab wound or pin site infection- Such an infection might be considered either a skin (SKIN) or soft tissue (ST) infection, depending on its depth, but not an SSI<br/>Note: A laparoscopic trocar site for an operative procedure is not considered a stab wound.</li> <li>• An infected burn wound is classified as BURN and is not an SSI.</li> </ul>                                          |
| <i>Deep Incisional SSI</i> | <p>The date of event for infection occurs from the date of fracture to 90 days after the definitive fracture management surgery (where day 1 = the procedure date)</p> <p><b>AND</b></p> <p>involves deep soft tissues of the incision (e.g., fascial and muscle layers)</p> <p><b>AND</b></p> <p>patient has at least one of the following:</p> <ol style="list-style-type: none"> <li>a. purulent drainage from the deep incision.</li> <li>b. a deep incision that spontaneously dehisces, or is deliberately opened or aspirated by a surgeon, attending physician or other designee, and organism is identified by a culture or non-culture based microbiologic testing method which is performed for purposes of clinical diagnosis or treatment (e.g., not Active Surveillance Culture/Testing [ASC/AST]) or culture or non-culture based microbiologic testing method is not performed</li> </ol> <p style="text-align: center;"><b>AND</b></p> <p>patient has at least one of the following signs or symptoms: fever (&gt;38°C); localized pain or tenderness. A culture or non-culture based test that has a negative finding does not meet this criterion.</p> <ol style="list-style-type: none"> <li>c. an abscess or other evidence of infection involving the deep incision that is detected on gross anatomical or histopathologic exam, or imaging test</li> </ol>                                                              |
| <i>Organ/Space SSI</i>     | <p>Date of event for infection occurs from the date of fracture to 90 days after the definitive fracture management surgery (where day 1 = the procedure date)</p> <p><b>AND</b></p> <p>infection involves any part of the body deeper than the fascial/muscle layers, that is opened or manipulated during the operative procedure</p> <p><b>AND</b></p> <p>patient has at least one of the following:</p> <ol style="list-style-type: none"> <li>a. purulent drainage from a drain that is placed into the organ/space (e.g., closed suction drainage system, open drain, T-tube drain, CT guided drainage)</li> <li>b. organisms are identified from an aseptically-obtained fluid or tissue in the organ/space by a culture or non-culture based microbiologic testing method which is performed for purposes of clinical diagnosis or treatment (e.g., not Active Surveillance Culture/Testing [ASC/AST]).</li> <li>c. an abscess or other evidence of infection involving the organ/space that is detected on gross anatomical or histopathologic exam, or imaging test evidence suggestive of infection.</li> </ol> <p><b>AND</b></p> <p>meets at least one criterion for a specific organ/space infection site listed in Table 3 of the CDC Procedure-associated Module (summarized in Table 4 below).<sup>25</sup> These criteria are found in the Surveillance Definitions for Specific Types of Infections chapter.<sup>37</sup></p> |

873 \*The CDC criteria has been modified to include all definitive fracture management surgeries, as opposed to  
874 including only National Healthcare Safety Network procedures that require infection reporting.  
875

876 The CDC criteria for classifying SSIs will be followed. If multiple tissue levels are involved in  
877 the infection, the type of SSI (superficial incisional, deep incisional, or organ/space) reported  
878 will reflect the deepest tissue layer involved in the infection during the surveillance period. The  
879 date of event will be the date that the participant met criteria for the deepest level of infection  
880 using the following procedures: 1) report infection that involves the organ/space as an  
881 organ/space SSI, whether or not it also involves the superficial or deep incision sites and 2)  
882 report infection that involves the superficial and deep incisional sites as a deep incisional SSI.  
883 The most relevant National Healthcare Safety Network Organ/Space SSI classifications are  
884 summarized in **Table 4**. Whenever possible, the treating surgeon or study personnel should take  
885 photos of the infected region to facilitate the adjudication process.  
886

887 **Table 4: Relevant Organ/Space SSI Sites**

|                 |      |                            |
|-----------------|------|----------------------------|
| Organ/Space SSI | BONE | Osteomyelitis              |
|                 | JNT  | Joint or bursa infection   |
|                 | PJI  | Prosthetic joint infection |

888  
889  
890 All reported SSIs will be reviewed independently by an infection preventionist nurse and an  
891 orthopaedic surgeon who are members of the Adjudication Committee. Briefly, they will  
892 complete the review by examining all relevant information to determine if the SSI meets the  
893 CDC criteria of a superficial incisional SSI, deep incisional SSI, or organ/space SSI. The  
894 Committee will reach consensus on all reviewed SSIs. A hospital epidemiologist and infectious  
895 disease physician who are members of the Adjudication Committee will be available to provide  
896 guidance as needed. All members of the Adjudication Committee will be blinded to the  
897 treatment allocation.  
898

#### 899 4.8.2 Secondary Outcome

900 The secondary outcome is unplanned fracture-related reoperation within 12 months of the  
901 fracture(s). This outcome has been used in previous fracture trials and is defined as any  
902 unplanned surgery that occurred from the time of injury to 12 months post-injury that is  
903 associated with an infection at the operative site or contiguous to it, a wound-healing problem, or  
904 a fracture delayed union or nonunion. Common examples include any unplanned: 1) irrigation  
905 and debridement of surgical incisions or open fracture wounds due to infections or wound  
906 healing problems; 2) revision wound closure for dehiscence; 3) soft tissue coverage procedure  
907 for infected or necrotic wound; 4) fracture delayed union or nonunion surgery (such as bone  
908 grafting or implant exchange); and 5) reoperation for hardware or prosthesis failure due to  
909 infection or bone-healing problems. Removal of hardware for soft tissue prominence or  
910 periprosthetic fracture are common examples of reoperations that will not be considered outcome  
911 events. To facilitate adjudication, the treating surgeon or study personnel should take  
912 photographs of any infections or wound infections. Two orthopaedic surgeons who are members  
913 of the Adjudication Committee will independently review all reported unplanned fracture-related  
914 reoperations to determine if they meet the criteria for being a study event. The Committee will  
915 reach consensus on all reviewed unplanned fracture-related reoperations.  
916

917 4.8.3 Exploratory Outcomes

918 Two exploratory definitions of infection will be used for sensitivity analyses of the primary  
919 comparison. The first exploratory outcome is fracture-related infection (FRI) within 12 months  
920 of the fracture, defined by the confirmatory criteria for FRI outlined in a 2018 consensus  
921 definition.<sup>38</sup> The FRI criteria has been selected as an exploratory outcome because the CDC  
922 criteria has been criticized for failing to adequately account for the complexities of infections in  
923 traumatic fractures.<sup>38,39</sup> The FRI criteria attempts to improve upon the ability to detect infections  
924 specifically in fracture patients; however, this definition of FRI has not been fully validated or  
925 widely adopted.

926  
927 The confirmatory criteria include the presence of one or more of the following signs/symptoms:

- 928 1) Fistula, sinus or wound breakdown (with communication to the bone or the implant).
- 929 2) Purulent drainage from the wound or presence of pus during surgery.
- 930 3) Phenotypically indistinguishable pathogens identified by culture from at least two  
931 separate deep tissue/implant (including sonication-fluid) specimens taken during an  
932 operative intervention. In case of tissue, multiple specimens (3) should be taken, each  
933 with clean instruments (not superficial or sinus tract swabs). In cases of joint effusion,  
934 arising in a joint adjacent to a fractured bone, fluid samples obtained by sterile puncture  
935 may be included as a single sample.
- 936 4) Presence of microorganisms in deep tissue taken during an operative intervention, as  
937 confirmed by histopathological examination using specific staining techniques for  
938 bacteria or fungi.

939  
940 The second exploratory outcome is SSI using the CDC criteria *within 12 months of the fracture*.  
941 This secondary outcome will use the same diagnostic CDC reporting criteria for the primary  
942 outcome (**Tables 3 and 4**); however, the timeframe for this outcome will be expanded to include  
943 all SSIs that occur within 12 months of fracture. Similar to the rationale for using the FRI  
944 outcome, and the recommendations for a minimum of 12 months follow-up for orthopaedic  
945 fracture outcomes<sup>40</sup>, this expanded timeframe will detect infections that occur beyond the  
946 standard CDC surveillance reporting periods. This modification of the CDC reporting periods  
947 has been used in previous orthopaedic fracture trials.<sup>4,41</sup>

948  
949 An infection preventionist nurse and an orthopaedic surgeon member of the Adjudication  
950 Committee will review all reported SSIs to determine if they meet the FRI confirmatory criteria  
951 and / or the CDC criteria following the processes described above (see Section 4.8.1).

952  
953 4.8.4 Data Collection and Participant Follow-up

954 After obtaining informed consent, study personnel will record the baseline data on the study  
955 CRFs. They will obtain this information directly from the participant or proxy, from the  
956 participant's medical chart, and the participant's treating orthopaedic surgeon or other health  
957 care providers. Data collection points include participant characteristics and injury details such  
958 as age, gender, comorbidities, mechanism of injury, and other injuries. Study personnel will also  
959 record the characteristics of up to three eligible fracture regions including the bone(s) fractured,  
960 fracture severity, size of the wound (if applicable), and degree of soft tissue injury using the  
961 Tscherne classification in closed fractures and the Gustilo classification in open fractures.<sup>1,34,36</sup>

962  
963 Surgical data and in-hospital data will be collected throughout the participant's hospital stay.  
964 Detailed information will be collected regarding the surgical management of their fracture(s),

965 including the timing of the surgery(ies) and the method of initial and definitive fracture  
966 treatment. For open fracture regions, study personnel will also record the use of staged  
967 debridements, the presence or lack of skin closure between debridements, and the use of local  
968 antibiotics at the wound. Lastly, study personnel will record the use of negative pressure wound  
969 therapy for open wounds or in the presence of open wounds surgically closed. These treatment  
970 decisions are hypothesized to be associated markers of injury severity and potential confounders  
971 of the study interventions.

972  
973 Study participants will be followed at 6 weeks, 3 months, 6 months, 9 months, and 12 months  
974 from their fracture. SSIs and unplanned fracture-related reoperations will be identified at the  
975 time of diagnosis/occurrence and/or during each participant's clinical assessment and medical  
976 record review that will occur during their routine outpatient clinic visits (**Table 2**). Detailed  
977 information on the SSI including the date of diagnosis, participant signs and symptoms, culture  
978 test results, method of treatment(s), and date of resolution will be collected. Study personnel will  
979 also record details about the participants' reoperations on the CRFs (e.g., date of reoperation,  
980 type of procedure, reason for procedure, etc.). In cases where the participant does not return to  
981 the clinic, study personnel will contact the participant by telephone, text, email, and standard  
982 mail and will review their medical record for any SSIs or fracture-related reoperations. If the  
983 participant reports being treated at another hospital, study personnel will obtain the medical  
984 records from the other hospital. We have used this approach in our other multi-center trials (e.g.,  
985 SPRINT, TRUST, FLOW, FAITH, HEALTH, etc.).<sup>4,41-44</sup>

986  
987 To ensure research participant safety, serious adverse events (SAEs) will be documented at each  
988 follow-up visit and promptly submitted to the Methods Center and the local or central  
989 Institutional Review Board (IRB) or Research Ethics Board (REB) as per the required reporting  
990 processes.

991  
992 Several strategies may be used to maximize follow-up including: 1) at the time of enrollment,  
993 each participant will provide their own telephone number, as well as the name and address of a  
994 primary care physician, and the names and phone numbers of three people at different addresses  
995 with whom the participant does not live with and who are likely to be aware of the participant's  
996 whereabouts; 2) participants will receive a reminder card upon discharge for their next follow up  
997 visit by the clinical site study personnel; 3) participants will receive text message reminders; 4)  
998 follow-up will coincide with normal surgical fracture clinic visits; and 5) if a participant refuses  
999 or is unable to return for the follow-up assessment, study personnel will determine his/her status  
1000 with regard to major study outcomes by telephone, text, mail, or email contact with the  
1001 participant or the provided alternate contacts. Given these are standard of care visits and the  
1002 participants will be receiving ongoing orthopaedic care for their acute fractures, minimal loss to  
1003 follow-up is expected. Using these techniques, we expect greater than 95% follow-up at 3  
1004 months and 90% follow-up at 12 months post-fracture.

1005  
1006 Participants will not be deemed lost to follow-up until the 12-month visit is overdue and all  
1007 attempts to contact the participant have been exhausted. Participants will not be withdrawn from  
1008 the study if the study protocol was not adhered to (e.g., allocated treatment not received, missed  
1009 follow-up visits, etc.). The reasons for participants being withdrawn from the study will be  
1010 documented (e.g., withdrawal of consent or lost to follow up).

1011

## 1012 5.0 STATISTICAL PLAN

1013

### 1014 5.1 Sample Size Determination

1015 The overall objective of the trial is to determine the most effective alcohol-based pre-operative  
1016 antiseptic skin solution for use during extremity fracture management. This objective is being  
1017 performed independently in the open and closed fracture populations. In both fracture  
1018 populations, the analyses will compare the effectiveness of iodine povacrylex (0.7% free iodine)  
1019 in 74% isopropyl alcohol versus 2% CHG in 70% isopropyl alcohol surgical skin preparations.  
1020 The primary outcome is the occurrence of SSI, as per the adapted CDC criteria (**Table 3**).<sup>25</sup> The  
1021 secondary outcome is the occurrence of unplanned fracture-related reoperations within 12  
1022 months of injury. Separate sample size estimates for the open and closed fracture populations  
1023 were calculated to facilitate the primary comparison between proportions of patients with SSI in  
1024 each treatment group. It is expected that this estimate will also provide adequate power for the  
1025 secondary outcome (unplanned fracture-related reoperation) because a meaningful effect size for  
1026 the reoperation outcome is expected to be similar to the SSI estimates. Additionally, the baseline  
1027 risk of unplanned reoperations in both fracture populations is expected to be greater than the risk  
1028 of SSI.<sup>4</sup>

1029

1030 Assuming an ITT principle for the analysis, the sample size was calculated based on a cluster  
1031 crossover design with the cluster as the unit of randomization and the patient as the unit of  
1032 analysis. For complex study designs, such as a cluster-randomized crossover trial, simple  
1033 formulas to calculate sample size or power may not capture the expected variability from the  
1034 observed data.<sup>45</sup> Simulation methods were used to obtain empirical power calculations based on  
1035 a feasible number of recruiting clusters and the expected number of participants within the open  
1036 and closed fracture populations.<sup>45</sup> The simulation estimates are designed to detect a difference  
1037 between the treatment groups, accounting for between hospital variability inherent to a cluster-  
1038 crossover trial design.

1039

1040 We have estimated the CHG group will experience a SSI incidence of 12.5% in the open fracture  
1041 population and a 3.5% incidence within the closed fracture population.<sup>3,4</sup> Compared to CHG, we  
1042 have assumed the iodine povacrylex solution will achieve a 0.65 risk reduction for SSI and  
1043 unplanned fracture-related reoperation in each fracture population.<sup>22</sup> This effect was selected as  
1044 the smallest difference that would be important to detect, in the sense that any smaller effect  
1045 would not be of clinical or substantive importance. Additionally, this effect was deemed more  
1046 conservative than data reported by Swenson et al. and was consistent with feasible recruitment  
1047 goals.<sup>21</sup>

1048

1049 We have based our sample size assumptions using a single crossover, 2-period design to ensure  
1050 the most conservative sample size estimate. Recent simulation data suggest that increasing the  
1051 number of period crossovers can increase the statistical power of a given sample size.<sup>46</sup> The  
1052 initial power estimate assumed 10 recruiting clusters, a 10% loss to follow-up rate,<sup>4</sup> and applying  
1053 the between-cluster variance of 0.095 observed in the FLOW trial. Based on enrollment of a  
1054 minimum of 1,540 open fracture patients and 6,280 closed lower extremity and pelvic fractures,  
1055 greater than 80% power would be achieved for each fracture population. Subsequent to the initial  
1056 power calculations, the early trial experience demonstrated a need to increase the number of  
1057 clusters to obtain a feasible recruitment pace. As a result, a minimum 18 clusters will enroll  
1058 participants into PREPARE. The increase in clusters results in a marginal increase in power  
1059 (~2%).

1060  
1061  
1062  
1063  
1064  
1065

**Table 5** and **Table 6** below outlines the summary of the initial sample size assumptions. These sample size estimates are rounded up to the nearest multiple of 20 to ensure balance among 10 clinical sites and two interventions.

**Table 5: Sample Size Assumptions for Open Fractures**

| Baseline SSI Risk | Iodine Risk Ratio | Iodine Odds Ratio | Sample Size | Sample Size Increased by 10% |
|-------------------|-------------------|-------------------|-------------|------------------------------|
| 10.0%             | 0.62              | 0.59              | 1,600       | 1,760                        |
| 10.0%             | 0.65              | 0.63              | 1,960       | 2,100                        |
| 10.0%             | 0.67              | 0.65              | 2,200       | 2,420                        |
| 10.0%             | 0.70              | 0.68              | 2,600       | 2,860                        |
| 12.5%             | 0.62              | 0.59              | 1,300       | 1,440                        |
| 12.5%             | 0.65              | 0.62              | 1,400       | 1,540                        |
| 12.5%             | 0.67              | 0.64              | 1,600       | 1,760                        |
| 12.5%             | 0.70              | 0.67              | 1,800       | 1,980                        |
| 14.0%             | 0.62              | 0.58              | 1,200       | 1,320                        |
| 14.0%             | 0.65              | 0.61              | 1,300       | 1,440                        |
| 14.0%             | 0.67              | 0.64              | 1,500       | 1,660                        |
| 14.0%             | 0.70              | 0.67              | 1,800       | 1,980                        |

**Note:** Between cluster ICC = 0.028; Between cluster variance = 0.095; Between period variance = 0; Number of clusters = 10; Number of periods = 2; Alpha = 0.05

1066  
1067  
1068  
1069

**Table 6: Sample Size Assumptions for Closed Fractures of the Lower Extremity**

| Baseline SSI Risk | Iodine Relative Risk | Iodine Odds Ratio | Sample size | Sample Size increased by 10% |
|-------------------|----------------------|-------------------|-------------|------------------------------|
| 2%                | 0.62                 | 0.62              | 8,200       | 9,020                        |
| 2%                | 0.65                 | 0.65              | 10,000      | 11,000                       |
| 2%                | 0.67                 | 0.67              | 11,400      | 12,540                       |
| 3.5%              | 0.62                 | 0.61              | 4,700       | 5,170                        |
| 3.5%              | 0.65                 | 0.64              | 5,700       | 6,280                        |
| 3.5%              | 0.67                 | 0.66              | 6,600       | 7,260                        |
| 5%                | 0.62                 | 0.61              | 3,300       | 3,640                        |
| 5%                | 0.65                 | 0.64              | 4,100       | 4,520                        |
| 5%                | 0.67                 | 0.67              | 4,300       | 4,740                        |

**Note:** Between cluster ICC = 0.028; Between cluster variance\* = 0.095; Between period variance = 0; Number of clusters = 10; Number of periods = 2; Alpha = 0.05

1070  
1071  
1072

## 5.2 Statistical Methods

1073  
1074

### 5.2.1 Analysis Plan Overview

1075  
1076  
1077  
1078  
1079  
1080  
1081  
1082  
1083  
1084  
1085

A detailed statistical analysis plan will be published prior to the completion of the trial. The following analysis plan will be conducted independently for the open and closed fracture populations. For each population, the analyses and reporting of the results will follow the CONSORT guidelines for reporting of both pragmatic trials<sup>47</sup> and cluster-randomized trials.<sup>48</sup> The process of participant enrollment and flow throughout the study will be summarized using a flow-diagram. Participant demographics and baseline outcome variables will be summarized using descriptive summary measures expressed as mean (standard deviation) or median (interquartile range) for continuous variables depending on the distribution, and number (percent) for categorical variables.<sup>49</sup> An ITT principle will be adopted to analyze all outcomes and the unit of analysis will be the individual participants. Missing data will be assumed to be missing at random and will be handled with multiple imputation.<sup>50,51</sup>

1086  
1087  
1088  
1089  
1090  
1091  
1092  
1093  
1094  
1095  
1096  
1097  
1098  
1099  
1100  
1101  
1102  
1103  
1104  
1105  
1106  
1107  
1108  
1109  
1110

The primary analysis will compare the treatment groups using the SSI outcome and the secondary analysis will compare the unplanned fracture-related reoperation outcome. The secondary comparison will be conducted in accordance with best practice guidelines for secondary analyses. For all models, the results will be expressed as relative measure of effect (odds, risk, or hazard ratios) and corresponding two-sided 95% confidence intervals.

### 5.2.2 Analysis of the Study Outcomes

Adopting an ITT principle, multilevel regression models will be used. Correlation structures will be fit based on the observed between cluster and between period effects. A robust sandwich estimator will be used to analyze the primary and secondary outcomes.

For the primary outcome, SSI will be the dependent variable and the antiseptic solution (treatment group) will be the independent variable. For the secondary outcome, unplanned fracture-related reoperation will be the dependent variable and the antiseptic solution (treatment group) will be the independent variable. For both analyses, multiple imputation will be used to handle missing data.<sup>51</sup>

As the optimal methods for analyzing cluster crossover trials continue to evolve, the final statistical modeling technique to be used will be determined in accordance with contemporary best practices prior to the completion of participant follow-up. A separate Statistical Analysis Plan will be developed prior to study closeout. **Table 7** below shows a summary of the study outcomes, corresponding hypotheses, and currently proposed methods of analysis.

**Table 7: Summary of Outcome Analysis Plan**

| Objective                                                                                                                                                            | Outcome                                |        | Hypothesis                                               | Method of Analysis           |
|----------------------------------------------------------------------------------------------------------------------------------------------------------------------|----------------------------------------|--------|----------------------------------------------------------|------------------------------|
|                                                                                                                                                                      | Name                                   | Type   |                                                          |                              |
| To determine the effect of iodine-based versus CHG-based pre-operative antiseptic skin solutions on the incidence of SSI and unplanned fracture-related reoperation. | SSI                                    | Binary | Iodine solution will be more effective than CHG solution | Multi-level regression model |
|                                                                                                                                                                      | Unplanned Fracture-Related Reoperation | Binary | Iodine solution will be more effective than CHG solution | Multi-level regression model |

**Note:** CHG = chlorhexidine gluconate; SSI = Surgical Site Infection

1111  
1112  
1113  
1114  
1115  
1116  
1117  
1118  
1119

### 5.2.3 Subgroup Analyses

A limited number of *a priori* subgroup analyses will be performed. The open fracture subgroups will include: i) severity of open fracture wound (Gustilo-Anderson type I or II versus III);<sup>1</sup> ii) upper extremity versus lower extremity open fractures; iii) none, minimal, or surface contamination versus contamination embedded in bone or deep soft tissues;<sup>34</sup> and, iv) presence or absence of comorbidities that affect wound healing.

1120  
1121  
1122  
1123

The closed fracture subgroups of interest include: i) severe soft tissue injury (Tscherne Grade 3 versus Tscherne Grade 0-2) and, ii) presence or absence of comorbidities that affect wound healing. These analyses will be performed by comparing the effect estimates in both groups (interaction effect). We hypothesize that effect will differ by subgroup. These analyses will be



1124 approached and reported in accordance with best practices and guidelines for subgroup  
 1125 analyses.<sup>33,52-54</sup> **Table 8** below shows a summary of the subgroup analysis objectives,  
 1126 corresponding outcomes, hypotheses, and methods of analysis for each fracture population.  
 1127  
 1128

**Table 8: Summary of Subgroup Analysis Plan**

| Objective                                                                      | Outcome                                      |        | Hypothesis                                                                                                                                                                                                | Method of Analysis                   |
|--------------------------------------------------------------------------------|----------------------------------------------|--------|-----------------------------------------------------------------------------------------------------------------------------------------------------------------------------------------------------------|--------------------------------------|
|                                                                                | Name                                         | Type   |                                                                                                                                                                                                           |                                      |
| <i>Open Fracture Subgroup Analyses</i>                                         |                                              |        |                                                                                                                                                                                                           |                                      |
| Severity of open fracture (Gustilo-Anderson Type I or II vs. Type III)         | SSI / Unplanned Fracture-Related Reoperation | Binary | Iodine solution will be associated with a larger reduction in odds for SSI and reoperation than CHG solution in more severe fractures                                                                     | Interaction of treatment by subgroup |
| Upper extremity vs. lower extremity fractures                                  | SSI / Unplanned Fracture-Related Reoperation | Binary | Iodine solution will be associated with a larger reduction in odds for SSI and reoperation than CHG solution in lower extremity compared to upper extremity fractures                                     | Interaction of treatment by subgroup |
| None, minimal, or surface wound contamination vs. embedded wound contamination | SSI / Unplanned Fracture-Related Reoperation | Binary | Iodine solution will be associated with a larger reduction in odds for SSI and reoperation than CHG solution in embedded contaminated wounds compared to wounds with no, minimal or surface contamination | Interaction of treatment by subgroup |
| Presence or absence of comorbidities that affect wound healing                 | SSI / Unplanned Fracture-Related Reoperation | Binary | Iodine solution will be associated with a larger reduction in odds for SSI and reoperation than CHG solution in participants who have comorbidities that affect wound healing                             | Interaction of treatment by subgroup |
| <i>Closed Fracture Subgroup Analyses</i>                                       |                                              |        |                                                                                                                                                                                                           |                                      |
| Severe soft tissue injuries (Tscherne Grade 3 vs. Tscherne Grade 0-2)          | SSI / Unplanned Fracture-Related Reoperation | Binary | Iodine solution will be associated with a larger reduction in odds for SSI and reoperation than CHG solution in fractures with severe soft tissue injuries                                                | Interaction of treatment by subgroup |
| Presence or absence of comorbidities that affect wound healing                 | SSI / Unplanned Fracture-Related Reoperation | Binary | Iodine solution will be associated with a larger reduction in odds for SSI and reoperation than CHG solution in participants who have comorbidities that affect wound healing                             | Interaction of treatment by subgroup |

**Note:** CHG = chlorhexidine gluconate; SSI = Surgical Site Infection

1129  
 1130  
 1131 **5.2.4 Sensitivity Analyses**  
 1132 Assessment of the sensitivity or robustness of the findings to the key assumptions is essential in  
 1133 trials. The following sensitivity analyses may be conducted to explore the effects of alternative  
 1134 analysis models, alternative missing data approaches, balancing prognostic imbalance, as-treated  
 1135 analyses, variability in co-interventions, and alternative definitions of SSI.  
 1136

- 1137 1. *Using different analysis models:* There are several methods for analyzing cluster  
1138 randomized crossover trials.<sup>51,55</sup> Therefore, our sensitivity analyses will explore  
1139 alternative multi-level models with different correlation structures for the error.<sup>52,55</sup>  
1140
- 1141 2. *Different methods of handling missing data:* There are several methods of handling  
1142 missing data in trials.<sup>55</sup> Multiple imputation assumes that the data are missing at  
1143 random—an assumption that is not verifiable in practice. Other imputation methods will  
1144 be used such as worst case scenario to impute missing data and assess the robustness of  
1145 the results.<sup>56</sup> For the worst case scenario analysis, we will assume that a random sample  
1146 of participants lost to follow-up experienced a study event. For this sensitivity analysis,  
1147 the proportion assumed to experience a study event will be equivalent to the upper  
1148 confidence interval of the observed pooled event rate for each study outcome.  
1149
- 1150 3. *Adjusted analyses for prognostic imbalance:* We will also perform sensitivity analyses  
1151 that assume prognostic imbalance between the two treatment groups based on the  
1152 following key variables known to be risk factors for SSI or reoperation after extremity  
1153 fracture management: soft tissue injury, time from injury to definitive fixation, age,  
1154 work-related injury, and employment status.<sup>5</sup> For patients with open fractures, these  
1155 additional risk factors will also be considered: Gustilo fracture type, lower extremity  
1156 fracture, wound contamination, time from injury to first debridement, antiseptic wound  
1157 dressing in the emergency department, method of fixation, and wound closure at initial  
1158 debridement.<sup>5</sup> Adjusted analyses including the above risk factors and treatment group as  
1159 independent variables will be performed for the SSI and reoperation outcomes.  
1160
- 1161 4. *As-treated analyses:* The proportion of surgical procedures receiving the incorrect, non-  
1162 allocated antiseptic solution will be reported. “As-treated” sensitivity analyses will be  
1163 performed using the solution received as the independent variable. For participants that  
1164 were treated in a single fracture surgery, they will be analyzed using the antiseptic  
1165 solution received. For participants who received multiple fracture surgeries, two analyses  
1166 will be performed. First, the antiseptic solution used in their last surgery prior to a study  
1167 outcome event will define their study treatment. For the second analysis, the antiseptic  
1168 solution received in the majority of their fracture surgeries will define their study  
1169 treatment. Participants who were treated with multiple fracture management surgeries,  
1170 but received equal exposure to both treatment solutions (e.g., one surgery with CHG and  
1171 one surgery with iodine), will be analyzed within their originally allocated treatment  
1172 group.  
1173
- 1174 5. *Co-intervention variability:* Selective censoring of one or more clusters and / or treatment  
1175 periods will be performed to further explore between-cluster and between-period  
1176 variability identified in the primary and secondary outcome comparisons. These analyses  
1177 will be used to explore the robustness of the study conclusions in the context of measured  
1178 practice variations in co-interventions that differ between participating sites and / or  
1179 evolve over the duration of the study recruitment. Results that are sensitive to the  
1180 removal of a cluster(s) and / or period(s) will be reported, along with potential clinical  
1181 hypotheses that are supported by the measured clinical practice variation.  
1182
- 1183 6. *Quantitative pooling of open fracture and closed fracture populations:* We will  
1184 quantitatively pool the treatment effects from the open and closed fracture populations if

1185 the direction of the effect is consistent across the two populations. The rationale for this  
 1186 sensitivity analysis approach is that a consistent direction of effect in the two populations  
 1187 suggests that the populations and mechanism of effect are similar enough to provide a  
 1188 clinically useful estimate of treatment effect if applied to all surgically treated fractures.  
 1189 If the direction of the effect is in opposite directions, for example, CHG appears to be  
 1190 more effective in closed fractures and iodine povacrylex is more effective in open  
 1191 fractures, then no pooling will be performed. This scenario would suggest that the  
 1192 populations and heterogeneity of treatment effect is too divergent; therefore, a pooled  
 1193 treatment estimate would not be clinically useful since surgeons will continue to view the  
 1194 choice of antiseptic skin solution for open and closed fractures patients as separate  
 1195 treatment decisions.

1196  
 1197 7. *Exploratory SSI definitions:* The above analyses will be repeated for the primary  
 1198 comparison using the FRI outcome and the CDC definition within 1 year of injury to  
 1199 determine if the study conclusions are sensitive to alternative definitions of SSI.  
 1200

1201 **Table 9** below shows a summary of each potential sensitivity analysis objectives, corresponding  
 1202 outcomes, hypotheses, and methods of analysis.  
 1203  
 1204

**Table 9: Summary of Sensitivity Analysis Plan**

|   | Objective                       | Outcome                     |        | Hypothesis                                                                        | Method of Analysis                                                                |
|---|---------------------------------|-----------------------------|--------|-----------------------------------------------------------------------------------|-----------------------------------------------------------------------------------|
|   |                                 | Name                        | Type   |                                                                                   |                                                                                   |
| 1 | Different analysis models       | SSI / Reoperation           | Binary | Iodine solution will be more effective than CHG solution                          | Multi-level regression models with different correlation structures               |
| 2 | Different missing data approach | SSI / Reoperation           | Binary | Iodine solution will be more effective than CHG solution                          | Multi-level regression models with missing data imputed using worst-case scenario |
| 3 | Baseline prognostic imbalance   | SSI / Reoperation           | Binary | Iodine solution will be more effective than CHG solution                          | Multi-level regression models with prognostic variables & treatment group         |
| 4 | As-treated analysis             | SSI / Reoperation           | Binary | Iodine solution will be more effective than CHG solution                          | Multi-level regression models using “as treated” treatment group                  |
| 5 | Co-intervention variability     | SSI / Reoperation           | Binary | Cluster- and period-variability is related to co-interventions                    | Censoring of cluster(s) and/or period(s) with differences in co-interventions     |
| 6 | Quantitative pooling            | SSI / Reoperation           | Binary | Iodine solution will be more effective than CHG solution in all fracture patients | Meta-analysis with fixed effects                                                  |
| 7 | Exploratory SSI definitions     | FRI / CDC SSI within 1 year | Binary | Iodine solution will be more effective than CHG solution                          | Multilevel regression model                                                       |

1205 **Note:** CHG = chlorhexidine gluconate; SSI = Surgical Site Infection; FRI = fracture-related infection; CDC =  
1206 Centers for Disease Control and Prevention

1207

### 1208 5.2.5 Interim Analysis

1209 No formal interim analyses are planned and the trial will not be stopped early for benefit. The  
1210 Data and Safety Monitoring Committee (see Section 7.5.6) will review frequent safety reports  
1211 and will collectively make judgments on the strength of evidence and the absolute magnitude and  
1212 seriousness of any safety signals.<sup>57</sup> The Data and Safety Monitoring Committee may make  
1213 recommendations regarding the trial.

1214

## 1215 **6.0 DATA MANAGEMENT**

1216

### 1217 **6.1 Case Report Forms and Data Transmission**

1218 Clinical sites will be provided with the trial CRFs prior to initiation of enrollment. Research  
1219 personnel at each clinical site will submit the required data, as detailed on the CRFs, to the  
1220 Methods Center using the REDCap Cloud electronic data capture system. Clinical site personnel  
1221 will receive a unique login and password for the REDCap Cloud system and will be able to view  
1222 and modify data for participants recruited at their clinical site.

1223

### 1224 **6.2 Data Integrity**

1225 The REDCap Cloud system uses a variety of mechanisms for checking data at the time of entry  
1226 including skip logic, range checks, and data type checks. Upon receipt of new data, the personnel  
1227 at the Methods Center will query all missing, implausible, or inconsistent data. Clinical site  
1228 personnel will be able to review all open queries in the system and will be required to respond  
1229 promptly.

1230

## 1231 **7.0 ETHICS AND DISSEMINATION**

1232

### 1233 **7.1 Research Ethics Approval**

1234 The McMaster University Methods Center and all participating clinical sites will receive REB or  
1235 IRB approval prior to commencing participant enrollment. A central IRB and local IRBs/REBs  
1236 will be used based on clinical site logistics. Prior to local commencement of the study, each  
1237 clinical site will provide the Methods Center with a copy of their ethics approval.

1238

### 1239 **7.2 Consent**

1240 In many cluster randomized comparative effectiveness trials, a waiver of consent is obtained  
1241 from the IRB of Record. The rationale for the waiver of consent is that all patients will receive  
1242 treatments that are effective and within standards of care, they will receive one of the study  
1243 treatments as part of their routine care regardless of study participation, the data collection is  
1244 minimal and obtained from the patient's medical records, the trial involves no more than  
1245 minimal risk to the patient, and that the waiver of consent will not adversely affect the rights and  
1246 welfare of the patient. Most of these concepts apply to the current trial, as the PREPARE trial is  
1247 comparative effectiveness research where patients will receive one of the preoperative antiseptic  
1248 skin solutions regardless of their participation in the study. Additionally, patients are never  
1249 included in the decision-making process for the choice of antiseptic preparation solution, and, in  
1250 most situations, they are not even aware of which solution is used. However, in contrast to many  
1251 cluster randomized crossover trials, PREPARE trial personnel will need to contact participants  
1252 directly to collect baseline and outcome data, as this information cannot be reliably obtained

1253 from the patients' medical records. Therefore, study personnel will obtain informed consent  
1254 from patients prior to data collection. This consent process will allow study participants to be  
1255 informed about the study rationale and provide consent for ongoing surveillance and data  
1256 collection.

1257  
1258 To increase enrollment and to avoid missing potential study participants, the consent process  
1259 may take place up to 3 weeks post-fracture for open fracture patients and up to 6 weeks post-  
1260 fracture for closed fracture patients. Consultation during the study design phase with IRB  
1261 members and patient advisors confirmed the acceptability of this flexible approach, where  
1262 consent may be obtained after the intervention. The primary rationale for allowing consent after  
1263 the intervention is consistent with the waiver of consent principles outlined above, but in  
1264 addition, the patient and IRB stakeholders recognized that obtaining consent prior to the patient's  
1265 first surgery could add undue decision making stress to a patient who is awaiting surgical  
1266 management of a serious extremity injury; allowing consent after their surgery would likely  
1267 facilitate an improved consent process.

1268  
1269 The consent process will typically take place in the patient's hospital room or in the outpatient  
1270 fracture clinic, either before or after the patient has had surgery(ies) to manage their fracture. If  
1271 the patient is unable to provide informed consent (e.g., due to their injury, language restrictions)  
1272 within 3 weeks of their open fracture or 6 weeks of their closed fracture, informed consent will  
1273 be obtained from their proxy. In addition, if a patient has been discharged from hospital prior to  
1274 being invited to participate in the study, a delegated member of the clinical care team may  
1275 initiate the consent process by telephone, as approved by the IRB of Record.

1276  
1277 To obtain informed consent, delegated study personnel should follow the below procedures:  
1278 • Present study information in a manner that is understandable to the potential  
1279 participant/proxy.  
1280 • Discuss the study with the potential participant/proxy and answer any questions he or she  
1281 asks.  
1282 • Allow the potential participant/proxy an opportunity to discuss participation with their  
1283 family, friends, or family physician, if desired.  
1284 • Confirm that the participant/proxy understands the risks and benefits of participating in  
1285 the study and that their participation is voluntary.  
1286 • Complete and obtain signatures for informed consent form and obtain contact  
1287 information from the participant/proxy.  
1288 • Provide/send the participant/proxy with a paper/electronic copy of the signed consent  
1289 form.

1290  
1291 Consent may be obtained electronically or using pen and paper consent forms, as approved by  
1292 the IRB of Record. If potential participants are contacted by telephone, documenting written  
1293 informed consent will involve the following procedures:

1294 • The study team confirms the potential participant's interest in learning more about the  
1295 study and verifies the mailing address or fax number to which the consent form can be  
1296 sent.  
1297 • A blank consent form is mailed or faxed along with a cover letter that introduces the  
1298 study and explains when the phone conversation will occur. A stamped, self-addressed

1299 envelope is provided if standard mail is used so the participant can return the signed  
1300 consent document to the study team.

1301 • After the potential participant has received the document, a member of the study team  
1302 calls the participant and walks through the entire document over the phone, answering  
1303 questions and making notes about the participant's questions. Time and date of the  
1304 conversation should be recorded.

1305 • Once all questions are answered, the participant signs the consent form if they are willing  
1306 to participate. S/he returns the consent form by mail or fax.

1307 • Once received, the study team member who conducted the consent conversation should  
1308 sign the consent form and date with today's date. To explain the discrepancy, this  
1309 individual should also write a note on the consent form stating that the participant's  
1310 consent was obtained by phone on xx date (the date the participant signed.)

1311 • The participant should receive back a fully-signed copy of the consent form for their  
1312 records.

1313  
1314 The process of obtaining and documenting informed consent will be completed in accordance  
1315 with local Good Clinical Practice recommendations. Consent procedures and forms, and the  
1316 communication, transmission and storage of patient data will comply with the IRB of Record  
1317 requirements for compliance with The Health Insurance Portability and Accountability Act.

1318  
1319 Upon providing informed consent, study participants will be followed for 12 months from their  
1320 fracture. Given the short follow-up time, the need for a regular reassessment of consent will not  
1321 apply; however, participants may withdraw their consent at any time.

1322  
1323 **7.3 Confidentiality**  
1324 Information about study participants will be kept confidential and will be managed in accordance  
1325 with the below rules:

- 1326 • All study-related information will be stored securely.
- 1327 • All study participant information will be stored in locked file cabinets, or locked  
1328 room, as applicable, and accessible only to study personnel.
- 1329 • All paper and electronic CRFs will be identified only by a coded participant number.
- 1330 • All databases will be password protected.

1331  
1332 In the event that a participant revokes authorization to collect or use personal health information,  
1333 the clinical site retains the ability to use all information collected prior to the revocation of  
1334 participant authorization. For participants who have revoked authorization to collect or use  
1335 personal health information, attempts should be made to obtain permission to collect at least vital  
1336 status (i.e., primary outcome data) at the end of their scheduled study period.

1337  
1338 **7.4 Protocol Amendments**  
1339 Any amendments to the study protocol which will affect the conduct of the study, impact the  
1340 safety or benefits to participants or affect the analysis and the interpretation of the safety and  
1341 efficacy of the intervention under investigation (e.g., changes to the study objectives, study  
1342 design, sample size, or study procedures) will necessitate a formal amendment to the protocol.  
1343 Any protocol amendments will be approved by the Principal Investigators and will require  
1344 approval by the McMaster University REB, the Central IRB, local IRBs/REBs, as well as the  
1345 Funder (as needed). The Methods Center will also file an amendment to all applicable regulatory

1346 agencies for changes to the protocol made after the original regulatory approval. Clinical sites  
1347 will also be required to submit amendment requests to their IRB of Record to obtain approval for  
1348 the amendment and to provide the Methods Center with a copy of this approval. Administrative  
1349 changes (e.g., minor corrections or clarifications that have no effect on the way the study is  
1350 conducted) will not need to undergo a formal amendment process.

1351

## 1352 **7.5 Adverse Event Reporting and Definitions**

### 1353 7.5.1 Serious Adverse Event (SAE)

1354 A SAE is any adverse event that is any of the following:

- 1355 • Fatal
- 1356 • Life threatening
- 1357 • Requires or prolongs hospital stay
- 1358 • Results in persistent or significant disability or incapacity
- 1359 • A congenital anomaly or birth defect
- 1360 • An important medical event

1361

### 1362 7.5.2 Unanticipated Problems Resulting in Risk to Participant or Others

1363 Any incident, experience, or outcome that meets the following criteria:

- 1364 • Unexpected in nature, severity, or frequency (e.g., not described in study-related  
1365 documents such as the ethics-approved protocol or consent form, etc.).
- 1366 • Related or possibly related to participation in the research (i.e., possibly related  
1367 means there is reasonable possibility that the incident experience or outcome may  
1368 have been caused by the procedures involved in the research).
- 1369 • Suggests that the research places participants or others at greater risk of harm  
1370 (including physical, psychological, economic, or social harm).

1371

### 1372 7.5.3 Serious Unexpected Adverse Drug Reactions

1373 A serious adverse drug reaction means a noxious and unintended response to a drug that occurs  
1374 at any dose and that requires in-patient hospitalization or prolongation of existing hospitalization,  
1375 causes congenital malformation, results in persistent or significant disability or incapacity, is life-  
1376 threatening or results in death. An adverse drug reaction is considered unexpected when its  
1377 nature (i.e., specificity or outcome), severity or frequency is either not identified, or is not  
1378 consistent with the term or description used in the product labelling.

1379

### 1380 7.5.4 Adverse Event Reporting

1381 Clinical sites are responsible for reporting SAEs and serious unexpected adverse drug reactions  
1382 immediately to the Methods Center via the REDCap Cloud system. Significant new information  
1383 on ongoing SAEs should also be provided promptly to the Methods Center via the REDCap  
1384 Cloud system. Unanticipated problems resulting in risk to participants or others are also to be  
1385 reported promptly to the Methods Center.

1386

1387 The Methods Center will inform all applicable regulatory agencies of any serious unexpected  
1388 adverse drug reaction in respect of the drug that has occurred as follows:

- 1389 (a) if it is neither fatal nor life threatening, within 15 days after becoming aware of the  
1390 information; and
- 1391 (b) if it is fatal or life threatening, within seven days after becoming aware of the information.

1392 Within eight days after having informed the regulatory agency of any serious unexpected adverse  
1393 drug reactions, the Methods Center will submit to the regulatory agency a complete report in  
1394 respect of that information that includes an assessment of the importance and implication of any  
1395 findings made.

1396 Adverse drug reactions that are expected or unexpected, but not serious, will not be reported to  
1397 the regulatory agency, but rather monitored and tracked by the Methods Center. The Methods  
1398 Center will report to applicable regulatory agencies "expected, serious" adverse drug reactions,  
1399 where an increase in the rate of occurrence or severity, was judged to be clinically important.

1400  
1401 A causality assessment will be undertaken by the Methods Center, together with the responsible  
1402 investigator for clinical investigation cases, and any case judged as having a reasonable  
1403 suspected causal relationship to the medicinal product will be reported.

#### 1404 1405 7.5.5 Clinical Site Reporting – IRB and REB

1406 Clinical sites are responsible for reporting SAEs and unanticipated problems resulting in risk to  
1407 participants or others to their local REB/IRB or the Central IRB in accordance with local  
1408 reporting requirements. Copies of each report and documentation of ethic board notification and  
1409 receipt will be kept in the clinical site's study file.

#### 1410 1411 7.5.6 Data and Safety Monitoring Committee

1412 As per the FDA guidance document the *Establishment and Operation of Clinical Trial Data*  
1413 *Monitoring Committees for Clinical Trial Sponsors*, a Data and Safety Monitoring Committee  
1414 will oversee the safety of the trial participants and the overall conduct of the trial. The members  
1415 of the Data and Safety Monitoring Committee will include two orthopaedic surgeons, an  
1416 infectious disease expert, a biostatistician and a fracture patient representative. One orthopaedic  
1417 surgeon will act as the Chair of the Committee. The Data and Safety Monitoring Committee will  
1418 be responsible for safeguarding the interests of study participants, assessing the safety and  
1419 efficacy of study procedures, and for monitoring the overall conduct of the study. The Data and  
1420 Safety Monitoring Committee will frequently review enrollment and demographic summaries,  
1421 listings of protocol deviations, and summaries and listings of SAEs. They will advise the  
1422 Principal Investigators and study team on any concerns related to participant safety and trial  
1423 conduct, and will make recommendations for the study to continue as designed, for study  
1424 termination, for study continuation with major or minor modifications, or temporary suspension  
1425 of enrollment until some uncertainty is resolved. We will develop a Data and Safety Monitoring  
1426 Committee charter to guide the process.

#### 1427 1428 **7.6 Dissemination Policy**

1429 The results from each fracture population will be submitted for publication regardless of whether  
1430 there are significant findings. Every attempt will be made to ensure that the amount of time  
1431 between completion of data collection and release of study findings are minimized.

### 1432 1433 **8.0 SUB-STUDY: PATIENT EXPERIENCES IN THE AQUEOUS-PREP AND PREPARE** 1434 **TRIALS**

#### 1435 1436 **8.1 Introduction**

1437 Patient and stakeholder involvement in the design of randomized controlled trials is increasingly  
1438 becoming recognized as an essential component of a trial's success.<sup>58,59</sup> Patient and stakeholder



1439 involvement (PSI) has been seen as the paradigm shift from research being done “to” or “for”  
1440 patients, to research being performed “with” or “by” patients themselves.<sup>60</sup> PSI allows for  
1441 democratization of the research process and empowering patients throughout the entire research  
1442 process – from design through to knowledge dissemination.<sup>61</sup> Research has found that patients  
1443 and stakeholders are motivated to be involved in research for a wide variety of reasons, including  
1444 a desire to contribute to research for the benefit of others.<sup>62</sup>

1445  
1446 Prior research has argued that PSI enhances the focus of clinical trials on outcomes that are  
1447 relevant to patients themselves, thus increasing the utility of any research findings.<sup>63</sup>  
1448 Furthermore, PSI has been argued to improve recruitment and retention rates, while raising the  
1449 quality of research findings and ultimately helping with the dissemination of research findings.<sup>64</sup>  
1450 Lastly, PSI may be able to improve patient safety when patients are involved in safety reporting  
1451 in hospital settings.<sup>65</sup>

1452  
1453 Despite these findings, a recent systematic review estimates that far less than 1% of clinical trials  
1454 engage patients in any meaningful or active way.<sup>66</sup> From the onset of the PREP-IT trials (i.e. the  
1455 Aqueous-PREP and PREPARE trials), the PREP-IT investigators have engaged multiple patient-  
1456 partners and stakeholders in the design, conduct, and implementation of the PREP-IT trials. One  
1457 of our engagement goals is to identify ways in which we can better engage with PREP-IT study  
1458 participants. To support this goal, we seek to learn about PREP-IT participants’ experiences  
1459 within the PREP-IT trials. This knowledge will be used to improve the study team’s ability to  
1460 engage study participants and provide study information in a meaningful and accessible manner.  
1461 Additionally, the unique design of the PREP-IT trials (e.g., consent after the intervention,  
1462 minimal follow-up, minimal requirements for participants) provides a novel trial to investigate  
1463 this question. This led to the current sub-study.

## 1464 1465 **8.2 Rationale and Objectives**

1466 One of the mandates of the PREP-IT program is to improve orthopaedic fracture research  
1467 through meaningful engagement with our patient-partners and stakeholders. The objective of  
1468 this sub-study is to learn about PREP-IT participants’ experiences with participating in the  
1469 Aqueous-PREP or PREPARE trial. The results of this sub-study will be used to develop  
1470 strategies to better engage research participants both in the PREP-IT trials as well as in future  
1471 clinical trials.

## 1472 1473 **8.3 Sub-Study Design**

1474 This sub-study will consist of an exit survey that will be given to a subset of participants in the  
1475 PREP-IT trials. Select clinical sites participating in the Aqueous-PREP and / or PREPARE trial  
1476 will be invited to participate in the sub-study.

1477  
1478 The exit survey is comprised of 14 questions that includes multiple choice and brief open-ended  
1479 questions. All of the questions use clear and simple language written at or below a grade eight  
1480 reading level to enhance the validity of results. The survey length has been kept to a minimum  
1481 to maximize response rate and limit barriers that would affect its proper completion.

1482  
1483 The survey was created after reviewing the current literature and with input from the PREP-IT  
1484 investigators, research coordinators, patient-partners, and stakeholders. Engaging the larger  
1485 study team follows the PREP-IT philosophy of meaningful engagement, as well as helps to  
1486 ensure that no vital questions were missed and that the survey wording is clear and easily

1487 understandable to the target audience. The questionnaire was pre-tested on a sample of  
1488 convenience.

1489

#### 1490 **8.4 Survey Participants and Distribution**

1491 All potential substudy participants, or their proxies, will be required to provide informed consent  
1492 specifically for the substudy prior to completing the survey. Informed consent for the substudy  
1493 may be obtained at the time of enrollment in the Aqueous-PREP or PREPARE trial using  
1494 procedures described in sections 4.3.1 and 7.2, or in-person at a subsequent follow-up visit or  
1495 time of survey administration using a pen and paper consent form. The patient or proxy must be  
1496 provided with a copy of the signed informed consent form. All sites within the United States of  
1497 America must conduct their consenting process in accordance with HIPAA (Health Insurance  
1498 Portability and Accountability Act) regulations as approved by their institutions, and sites in  
1499 Canada must comply with the Personal Information Protection and Electronic Documents Act  
1500 (PIPEDA).

1501

1502 Clinical sites participating in the sub-study will offer the survey to all eligible participants at the  
1503 time they complete their one-year follow up visit. The survey will be sent to participants either  
1504 through mail, email or RedCap Cloud, given to them on paper at a follow-up visit, or  
1505 administered over the phone, depending on each individual participant's preference. The  
1506 Research Coordinator may also telephone or text the participant to remind them to complete the  
1507 exit survey. We will document the number of participants invited to participate in the survey as  
1508 well as the number of participants who decline participation.

1509

#### 1510 **8.5 Data Entry**

1511 The exit survey responses will be entered into the Aqueous-PREP / PREPARE trial's electronic  
1512 data capture (EDC) system.

1513

#### 1514 **8.6 Sample Size**

1515 Sample size was calculated using a 5% margin of error, with 95% confidence intervals, a  
1516 potential population of all patients who have completed one year follow up (approximately 1600  
1517 patients) and an expected response rate of 50%. With this in mind, a sample size of  
1518 approximately 310 patients who complete every survey question will be required.<sup>67</sup> As such, the  
1519 survey will be distributed to all participants at participating clinical sites until our sample size of  
1520 at least 310 participants is achieved.

1521

#### 1522 **8.7 Data Analysis**

1523 We will summarize all variables with frequencies and percentages. The short form questions  
1524 will be coded appropriately based on themes.

1525

#### 1526 **8.8 Anticipated Implications of Results**

1527 This research serves as an important step towards understanding patients' perspectives as  
1528 participants in a clinical trial. Additionally, the research may influence how future clinical trials  
1529 are designed and conducted, with the overall goal of a greater focus on the patient experience  
1530 and increasing patient involvement in research. Lastly, the results of this sub-study could help  
1531 the study team to develop aids (e.g., posters, pamphlets, etc.) to improve patients' understanding  
1532 of clinical research and overall experience with the PREP-IT trials.

1533

1534 **9.0 REFERENCES**

- 1535
- 1536 1. Gustilo R, Merkow R, Templeman D. Management of open fractures. *J Bone Jt Surg.*
- 1537 1990;72(2):299-304.
- 1538 2. National Center for Health Statistics. Public Use Microdata File Documentation, National
- 1539 Hospital Ambulatory Medical Care Survey, 2011. *Hyattsville, MD Natl Tech Inf Serv*
- 1540 *2011*. [https://www.cdc.gov/nchs/data/ahcd/nhamcs\\_outpatient/2011\\_opd\\_web\\_tables.pdf](https://www.cdc.gov/nchs/data/ahcd/nhamcs_outpatient/2011_opd_web_tables.pdf).
- 1541 Accessed February 28, 2018.
- 1542 3. Darouiche RO. Treatment of Infections Associated with Surgical Implants. *N Engl J Med.*
- 1543 2004;350(14):1422-1429.
- 1544 4. FLOW Investigators. A Trial of Wound Irrigation in the Initial Management of Open
- 1545 Fracture Wounds. *N Engl J Med.* 2015;373(27):2629-2641. doi:10.1056/NEJMoa1508502
- 1546 5. Gitajn IL, Sprague S, Petrisor B, Jeray KJ, O'Hara N, Nascone J, Bhandari M, Slobogean
- 1547 G, FLOW Investigators. Predictors of Complications in Severe Open Fractures. *J Orthop*
- 1548 *Trauma.*
- 1549 6. Edwards JR, Peterson KD, Mu Y, et al. National Healthcare Safety Network (NHSN)
- 1550 report: Data summary for 2006 through 2008, issued December 2009. *Am J Infect Control.*
- 1551 2009;37(10):783-805. doi:10.1016/j.ajic.2009.10.001
- 1552 7. Whitehouse JD, Friedman ND, Kirkland KB, Richardson WJ, Sexton DJ. The Impact of
- 1553 Surgical-Site Infections Following Orthopedic Surgery at a Community Hospital and a
- 1554 University Hospital Adverse Quality of Life, Excess Length of Stay, and Extra Cost.
- 1555 *Infect Control Hosp Epidemiol.* 2002;23(04):183-189. doi:10.1086/502033
- 1556 8. Unpublished Data - FLOW Trial.
- 1557 9. Schoenfeld AJ, Dunn JC, Belmont PJ. Pelvic, spinal and extremity wounds among
- 1558 combat-specific personnel serving in Iraq and Afghanistan (2003-2011): A new paradigm
- 1559 in military musculoskeletal medicine. *Injury.* 2013;44(12):1866-1870.
- 1560 doi:10.1016/j.injury.2013.08.001
- 1561 10. Molina CS, Stinner DJ, Fras AR, Evans JM. Course of treatment and rate of successful
- 1562 salvage following the diagnosis of deep infection in patients treated for pilon fractures
- 1563 (AO/OTA: 43). *J Orthop.* 2015;12:S18-S24. doi:10.1016/j.jor.2015.01.023
- 1564 11. Colman M, Wright A, Gruen G, Siska P, Pape H-C, Tarkin I. Prolonged operative time
- 1565 increases infection rate in tibial plateau fractures. *Injury.* 2013;4(2):249-252.
- 1566 doi:10.1016/j.injury.2012.10.032
- 1567 12. Lin S, Mauffrey C, Mark H, Stahel PF, Hak DJ. Surgical site infection after open
- 1568 reduction and internal fixation of tibial plateau fractures. *Eur J Orthop Surg Traumatol*
- 1569 *24797-803*. doi:10.1007/s00590-013-1252-8
- 1570 13. Morris, BJ, Unger, RZ, Archer, KR, Mathis, SL, Perdue, AM, Obremskey W. Risk
- 1571 Factors of Infection After ORIF of Bicondylar Tibial Plateau Fractures. *J Orthop Trauma.*
- 1572 2013;27(9).
- 1573 14. Momaya AM, Hlavacek J, Etier B, et al. Risk factors for infection after operative fixation
- 1574 of Tibial plateau fractures. *Injury.* 2016;24:1501-1505. doi:10.1016/j.injury.2016.04.011
- 1575 15. Wyrsh B, McFerran MA, McAndrew M, Limbird TJ, Harper MC, Johnson KD SH.
- 1576 Operative Treatment of Fractures of the Tibial Plafond. *JBJS.* 1996;78-A(11).
- 1577 16. Claessen FMAP, Braun Y, Van Leeuwen WF, Dyer GS, Van Den Bekerom MPJ, Ring D.
- 1578 What Factors are Associated With a Surgical Site Infection After Operative Treatment of
- 1579 an Elbow Fracture? *Clin Orthop Relat Res.* 1999;474:562-570. doi:10.1007/s11999-015-
- 1580 4523-3
- 1581 17. Farragos AF, Schemitsch EH, McKee MD. Complications of Intramedullary Nailing for

- 1582 Fractures of the Humeral Shaft: A Review. *J Orthop Trauma*. 1999;13(4):258-267.
- 1583 18. Torbert JT, Joshi M, Moraff A, et al. Current Bacterial Speciation and Antibiotic  
1584 Resistance in Deep Infections After Operative Fixation of Fractures. *J Orthop Trauma*.  
1585 2015;29(1):7-17. doi:10.1097/BOT.0000000000000158
- 1586 19. Darouiche RO, Wall Jr. MJ, Itani KMF, et al. Chlorhexidine-Alcohol versus Povidone-  
1587 Iodine for Surgical-Site Antisepsis. *N Engl J Med*. 2010;362(1):18-26.  
1588 doi:10.1056/NEJMoa0810988
- 1589 20. Tuuli MG, Liu J, Stout MJ, et al. A Randomized Trial Comparing Skin Antiseptic Agents  
1590 at Cesarean Delivery. *N Engl J Med*. 2016;374(7):647-655. doi:10.1056/NEJMoa1511048
- 1591 21. Swenson BR, Hedrick TL, Metzger R, Bonatti H, Pruett TL, Sawyer RG. Effects of  
1592 preoperative skin preparation on postoperative wound infection rates: a prospective study  
1593 of 3 skin preparation protocols. *Infect Control Hosp Epidemiol*. 2009;30(10):964-971.  
1594 doi:10.1086/605926
- 1595 22. Swenson BR, Sawyer RG. Importance of Alcohol in Skin Preparation Protocols. *Infect*  
1596 *Control Hosp Epidemiol*. 2010;31(09):977. doi:10.1086/655843
- 1597 23. McDonnell G, Russell AD. Antiseptics and disinfectants: Activity, action, and resistance.  
1598 *Clin Microbiol Rev*. 1999;12(1):147-179. doi:10.1007/s13398-014-0173-7.2
- 1599 24. Dumville J, McFarlane E, Edwards P, Lipp A, Holmes A, Liu Z. Preoperative skin  
1600 antiseptic for prevention of surgical wound infections after clean surgery. *Cochrane*  
1601 *Database Syst Rev*. 2013;(3):CD003949. doi:10.1002/14651858.CD003949.pub4
- 1602 25. Centers for Disease Control and Prevention (CDC). *Surgical Site Infection (SSI) Event.*;  
1603 2017.
- 1604 26. Kunisada T, Yamada K, Oda S, Hara O. Investigation on the efficacy of povidone-iodine  
1605 against antiseptic-resistant species. *Dermatology*. 1997;195 Suppl(suppl 2):14-18.  
1606 <http://www.ncbi.nlm.nih.gov/pubmed/9403250>.
- 1607 27. Russell AD, Day MJ. Antibacterial activity of chlorhexidine. *J Hosp Infect*. 1993;25:229-  
1608 238.
- 1609 28. Tsang STJ, Mills LA, Frantzias J, Baren JP, Keating JF, Simpson AHRW. Exchange  
1610 nailing for nonunion of diaphyseal fractures of the tibia: our results and an analysis of the  
1611 risk factors for failure. *Bone Joint J*. 2016;98-B(4):534-541. doi:10.1302/0301-  
1612 620X.98B4.34870
- 1613 29. Mills L, Tsang J, Hooper G, Keenan G, Simpson A. The multifactorial aetiology of  
1614 fracture nonunion and the importance of searching for latent infection. *Bone Joint Res*.  
1615 2016;5(10):512-519. doi:10.1302/2046-3758.510.BJR-2016-0138
- 1616 30. Schemitsch E, Bhandari M, Guyatt G, et al. Prognostic Factors for Predicting Outcomes  
1617 After Intramedullary Nailing of the Tibia Study to Prospectively Evaluate Reamed  
1618 Intramedullary Nails in Patients with Tibial Fractures (SPRINT) Investigators\*. *JBJS*.  
1619 2012;94(19):1786-1793. doi:10.2106/JBJS.J.01418
- 1620 31. MacKenzie EJ, Bosse MJ. Factors influencing outcome following limb-threatening lower  
1621 limb trauma: lessons learned from the Lower Extremity Assessment Project (LEAP). *J Am*  
1622 *Acad Orthop Surg*. 2006;14(10 Spec No.):S205-S210. doi:10.5435/00124635-200600001-  
1623 00044
- 1624 32. Solution. 3M™ DuraPrep™ Surgical. 3M™ DuraPrep™ Surgical Solution.  
1625 <http://multimedia.3m.com/mws/media/5159830/duraprep-surgical-solution.pdf>. Published  
1626 2009.
- 1627 33. Sun X, Briel M, Walter SD, Guyatt GH. Is a subgroup effect believable? Updating criteria  
1628 to evaluate the credibility of subgroup analyses. *BMJ*. 2010;340(9209):c117.  
1629 doi:10.1136/bmj.c117

- 1630 34. Müller M, Nazarian S, Koch P, Schatzker J. The Comprehensive Classification of  
1631 Fractures of Long Bones. *Springer-Verlag Berlin Heidelb.* 1990.  
1632 <http://www.springer.com/kr/book/9783540181651>.
- 1633 35. Järvinen TLN, Sihvonen R, Bhandari M, et al. Blinded interpretation of study results can  
1634 feasibly and effectively diminish interpretation bias. *J Clin Epidemiol.* 2014;67(7):769-  
1635 772. doi:10.1016/j.jclinepi.2013.11.011
- 1636 36. Gustilo R, Anderson J. Prevention of infection in the treatment of one thousand and  
1637 twenty-five open fractures of long bones: retrospective and prospective analyses. *J Bone*  
1638 *Joint Surg Am.* 1976;58(4):453-458.
- 1639 37. Centers for Disease Control and Prevention (CDC). *CDC/NHSN Surveillance Definitions*  
1640 *for Specific Types of Infections.*; 2017.
- 1641 38. Metsemakers WJ, Morgenstern M, McNally MA, et al. Fracture-related infection: A  
1642 consensus on definition from an international expert group. *Injury.* 2018.  
1643 doi:10.1016/j.injury.2017.08.040
- 1644 39. Metsemakers WJ, Kuehl R, Moriarty TF, et al. Infection after fracture fixation: Current  
1645 surgical and microbiological concepts. *Injury.* 2018. doi:10.1016/j.injury.2016.09.019
- 1646 40. Journal of Orthopaedic Trauma. Journal of Orthopaedic Trauma: Online submission and  
1647 review system. <http://edmgr.ovid.com/jot/accounts/ifauth.htm>. Published 2019. Accessed  
1648 April 10, 2019.
- 1649 41. Study to Prospectively Evaluate Reamed Intramedullary Nails in Patients with Tibial  
1650 Fractures Investigators, Bhandari M, Guyatt G, et al. Randomized trial of reamed and  
1651 unreamed intramedullary nailing of tibial shaft fractures. *J Bone Joint Surg Am.*  
1652 2008;90(12):2567-2578. doi:10.2106/JBJS.G.01694
- 1653 42. TRUST Investigators writing group, Busse JW, Bhandari M, et al. Re-evaluation of low  
1654 intensity pulsed ultrasound in treatment of tibial fractures (TRUST): randomized clinical  
1655 trial. *BMJ.* 2016;355:i5351. doi:10.1136/bmj.i5351
- 1656 43. FAITH Investigators. Fracture fixation in the operative management of hip fractures  
1657 (FAITH): an international, multicentre, randomised controlled trial. *Lancet.*  
1658 2017;389(10078):1519-1527. doi:10.1016/S0140-6736(17)30066-1
- 1659 44. Bhandari M, Devereaux PJ, Einhorn TA, et al. Hip fracture evaluation with alternatives of  
1660 total hip arthroplasty versus hemiarthroplasty (HEALTH): protocol for a multicentre  
1661 randomised trial. *BMJ Open.* 2015;5(2):e006263. doi:10.1136/bmjopen-2014-006263
- 1662 45. Reich NG, Myers JA, Obeng D, Milstone AM, Perl TM. Empirical power and sample size  
1663 calculations for cluster-randomized and cluster-randomized crossover studies. *PLoS One.*  
1664 2012;7(4):e35564. doi:10.1371/journal.pone.0035564
- 1665 46. Grantham KL, Kasza J, Heritier S, Hemming K, Litton E, Forbes AB. How many times  
1666 should a cluster randomized crossover trial cross over? *Stat Med.* 2019.  
1667 doi:10.1002/sim.8349
- 1668 47. Zwarenstein M, Treweek S, Gagnier JJ, et al. Improving the reporting of pragmatic trials:  
1669 an extension of the CONSORT statement. *BMJ.* 2008;337:a2390.  
1670 doi:10.1136/BMJ.A2390
- 1671 48. Campbell MK, Piaggio G, Elbourne DR, Altman DG. Consort 2010 statement: extension  
1672 to cluster randomised trials. *BMJ.* 2012;345(sep04 1):e5661-e5661.  
1673 doi:10.1136/bmj.e5661
- 1674 49. Thabane L, Akhtar-Danesh N. Guidelines for reporting descriptive statistics in health  
1675 research. *Nurse Res.* 2008;15(2):72-81. doi:10.7748/nr2008.01.15.2.72.c6331
- 1676 50. Sterne J, White I, Carlin J, et al. Multiple imputation for missing data in epidemiological  
1677 and clinical research: potential and pitfalls. *Br Med J.* 2009;338(July):b2393.

- 1678 doi:10.1136/bmj.b2393
- 1679 51. Little RJA, Rubin DB. *Statistical Analysis with Missing Data.*; 2002.  
1680 doi:10.2307/1533221
- 1681 52. Wang R, Lagakos SW, Ware JH, Hunter DJ, Drazen JM. Statistics in Medicine —  
1682 Reporting of Subgroup Analyses in Clinical Trials. *N Engl J Med.* 2007;357(21):2189-  
1683 2194. doi:10.1056/NEJMsr077003
- 1684 53. Sun X, Ioannidis JPA, Agoritsas T, Alba AC, Guyatt G. How to use a subgroup analysis:  
1685 users' guide to the medical literature. *JAMA.* 2014;311(4):405-411.  
1686 doi:10.1001/jama.2013.285063
- 1687 54. Sun X, Briel M, Busse JW, et al. Subgroup Analysis of Trials Is Rarely Easy (SATIRE): a  
1688 study protocol for a systematic review to characterize the analysis, reporting, and claim of  
1689 subgroup effects in randomized trials. *Trials.* 2009;10:101. doi:10.1186/1745-6215-10-  
1690 101
- 1691 55. Morgan KE, Forbes AB, Keogh RH, Jairath V, Kahan BC. Choosing appropriate analysis  
1692 methods for cluster randomised cross-over trials with a binary outcome. *Stat Med.*  
1693 2017;36(2):318-333. doi:10.1002/sim.7137
- 1694 56. Zhang Y, Alyass A, Vanniyasingam T, et al. A systematic survey of the methods literature  
1695 on the reporting quality and optimal methods of handling participants with missing  
1696 outcome data for continuous outcomes in randomized controlled trials. *J Clin Epidemiol.*  
1697 2017;88:67-80. doi:10.1016/j.jclinepi.2017.05.016
- 1698 57. Pocock SJ, Clayton TC, Stone GW. Challenging Issues in Clinical Trial Design Part 4 of a  
1699 4-Part Series on Statistics for Clinical Trials. *J Am Coll Cardiol.* 2015;66(25):2886-2898.  
1700 doi:10.1016/j.jacc.2015.10.051
- 1701 58. Chalmers I. What do I want from health research and researchers when I am a patient?  
1702 *BMJ.* 1995;310(6990):1315-1318. doi:10.1136/bmj.310.6990.1315
- 1703 59. Domecq JP, Prutsky G, Elraiyah T, et al. Patient engagement in research: A systematic  
1704 review. *BMC Health Serv Res.* 2014;14:89. doi:10.1186/1472-6963-14-89
- 1705 60. INVOLVE. *Briefing Notes for Researchers: Public Involvement in NHS, Public Health  
1706 and Social Care Research.*; 2012. [https://www.invo.org.uk/wp-  
1707 content/uploads/2014/11/9938\\_INVOLVE\\_Briefing\\_Notes\\_WEB.pdf](https://www.invo.org.uk/wp-content/uploads/2014/11/9938_INVOLVE_Briefing_Notes_WEB.pdf).
- 1708 61. Esmail L, Moore E, Rein A. Evaluating patient and stakeholder engagement in research:  
1709 Moving from theory to practice. *J Comp Eff Res.* 2015;4(2):133-145.  
1710 doi:10.2217/cer.14.79
- 1711 62. Tarpey M, INVOLVE Support Unit. *Why People Get Involved in Health and Social Care  
1712 Research: A Working Paper.* Vol July.; 2006. [http://www.invo.org.uk/wp-  
1713 content/uploads/documents/whypeoplegetinvolvedinresearch2006.pdf](http://www.invo.org.uk/wp-content/uploads/documents/whypeoplegetinvolvedinresearch2006.pdf).
- 1714 63. Brett J, Staniszewska S, Mockford C, et al. A Systematic Review of the Impact of Patient  
1715 and Public Involvement on Service Users, Researchers and Communities. *Patient.*  
1716 2014;7(4):387-395. doi:10.1007/s40271-014-0065-0
- 1717 64. Robinson A. Patient and public involvement: In theory and in practice. *J Laryngol Otol.*  
1718 2014;128(4):318-325. doi:10.1017/S0022215114000735
- 1719 65. Lawton R, O'Hara JK, Sheard L, et al. Can patient involvement improve patient safety? A  
1720 cluster randomised control trial of the Patient Reporting and Action for a Safe  
1721 Environment (PRASE) intervention. *BMJ Qual Saf.* 2017;26(8):622-631.  
1722 doi:10.1136/bmjqs-2016-005570
- 1723 66. Fergusson D, Monfaredi Z, Pussegoda K, et al. The prevalence of patient engagement in  
1724 published trials: A systematic review. *Res Involv Engagem.* 2018;4:17.  
1725 doi:10.1186/s40900-018-0099-x

- 1726 67. Bartlett JE, Kotrlik JWKJW, Higgins C. Organizational research: Determining appropriate  
1727 sample size in survey research appropriate sample size in survey research. *Inf Technol*  
1728 *Learn Perform J.* 2001;19(1):43-50.  
1729
